# Supplementary material for: Total Synthesis of the Antimitotic Marine Macrolide (−)-Leiodermatolide
Source: PubMed Central journal article supplement (PMC4499261; doi:10.1002/anie.201310164), 2014-01-30
Supplement: anie0053-2692-sd1.pdf [file anie0053-2692-sd1.pdf]

Supporting Information

© Wiley-VCH 2014

69451 Weinheim, Germany

**Total Synthesis of the Antimitotic Marine Macrolide  
(–)-Leiodermatolide\*\***

*Ian Paterson,\* Kenneth K.-H. Ng, Simon Williams, David C. Millican, and Stephen M. Dalby*

anie\_201310164\_sm\_miscellaneous\_information.pdf

## Supporting information

### Table of contents

|                                                                       |       |
|-----------------------------------------------------------------------|-------|
| I. General Procedures                                                 | SI-2  |
| II. Detailed experimental procedures                                  |       |
| a. Synthesis of western fragment <b>2</b>                             | SI-4  |
| b. Synthesis of eastern fragment <b>3</b>                             | SI-15 |
| c. Fragment coupling and endgame                                      | SI-25 |
| III. Comparison of NMR data for natural and synthetic leiodermatolide | SI-39 |
| IV. $^1\text{H}$ and $^{13}\text{C}$ NMR spectra                      | SI-40 |

## I. General Procedures

Reactions were carried out under an atmosphere of argon using oven dried glassware and standard techniques for handling air sensitive chemicals, unless the reaction contained aqueous reagents or unless otherwise stated.

Reagents were purified using standard laboratory procedures,<sup>[1]</sup> toluene, benzene, dichloromethane, and acetonitrile were distilled from CaH<sub>2</sub> and stored under an atmosphere of argon. Tetrahydrofuran (THF) and Et<sub>2</sub>O were distilled from potassium or sodium wire / benzophenone ketyl radical and stored under argon. Solvents used for extraction and chromatography were distilled. 2,6-lutidine, diisopropylamine, hexamethyldisilazane (HMDS), and triethylamine were distilled from CaH<sub>2</sub> and stored over CaH<sub>2</sub> under an atmosphere of argon. Acetic acid was distilled from acetic anhydride and CrO<sub>3</sub> and stored over 4Å molecular sieves. *N,N*-Dimethylformamide (DMF) was distilled from MgSO<sub>4</sub> and stored over 4Å molecular sieves. 2,3-Dichloro-5,6-dicyano-1,4-benzoquinone (DDQ) was recrystallised from C<sub>6</sub>H<sub>6</sub> and CHCl<sub>3</sub> (1:5). All other chemicals were used as received from the manufacturer unless otherwise stated.

Aqueous solutions of ammonium chloride (NH<sub>4</sub>Cl), sodium bicarbonate (NaHCO<sub>3</sub>), sodium thiosulfate (Na<sub>2</sub>S<sub>2</sub>O<sub>3</sub>), brine (NaCl) and sodium / potassium (Na/K) tartrate were saturated. Buffer solutions were prepared as directed from stock tablets.

Purification by flash column chromatography was carried out using Kieselgel 60 (230–400 mesh) and a positive pressure. Preparative thin layer chromatography was carried out using Merck Kieselgel 60 F254 plates.

TLC was carried out using Merck Kieselgel 60 F254 plates which were visualized using UV light (254 nm) and stained using potassium permanganate, anisaldehyde or phosphomolybdic acid / cerium sulfate dips.

NMR spectra were recorded using the following machines: Bruker Avance 500 cryo, Avance BB500, Avance TCI-ATM 500 cryo, and Avance DRX400. <sup>1</sup>H NMR spectra

---

[1] W. L. F. Armarego, D. D. Perrin, *Purification of Laboratory Chemicals*, 4<sup>th</sup> edition, Butterworth-Heinemann, 1996.

were recorded at 298 K using the residual undeuterated solvent as a reference compound,<sup>[2]</sup> CDCl<sub>3</sub> ( $\delta_{\text{H}} = 7.26$ ) or CD<sub>2</sub>Cl<sub>2</sub> ( $\delta_{\text{H}} = 5.32$ ). <sup>1</sup>H NMR data are presented as: chemical shift  $\delta$  (in ppm, relative to tetramethylsilane,  $\delta_{\text{TMS}} = 0$ ), integration, multiplicity (s = singlet, d = doublet, t = triplet, q = quartet, m = multiplet, br = broad, obs = obscured) and coupling constants ( $J$  in Hz). Signals are assigned according to the numbering scheme for leiodermatolide Figure 1 unless otherwise indicated. Assignments have been made based on the 1D data presented along with a range of 2D spectra, and comparison with fully assigned spectra for similar compounds. <sup>13</sup>C NMR spectra were recorded at 298 K with proton decoupling and an internal deuterium lock for CDCl<sub>3</sub> ( $\delta_{\text{C}} = 77.16$ ) or CD<sub>2</sub>Cl<sub>2</sub> ( $\delta_{\text{C}} = 53.83$ ).

Fourier transform IR spectroscopy (FT-IR) was carried out using a Perkin-Elmer Spectrum One spectrometer, and spectra were recorded as a thin film. Wavelengths of maximum absorption ( $\nu_{\text{max}}$ ) are reported in wavenumbers ( $\text{cm}^{-1}$ ).

Optical rotations were measured using a Perkin-Elmer 241 polarimeter at the sodium D line (589 nm) and are reported as  $[\alpha]_{\text{D}}^{20}$ , concentration ( $c$  in g / 100 mL) and solvent.

High resolution mass spectroscopy (HRMS) was carried out by the EPSRC UK National Mass Spectrometry Facility (Swansea, UK) or the departmental Mass spectrometry service (University Chemical Laboratories, Cambridge) using electrospray ionization (ESI) or atmospheric pressure chemical ionization (APCI). The parent ion  $[\text{M}+\text{NH}_4]^+$ ,  $[\text{M}+\text{Na}]^+$  or  $[\text{M}+\text{H}]^+$  is quoted.

The numbering system used for leiodermatolide follows that of Paterson and Wright<sup>[3]</sup> with the exception of methyl groups, which are denoted by the skeletal carbon they are appended to (Figure 1).

---

[2] G. R. Fulmer, A. J. M. Miller, N. H. Sherden, H. E. Gottlieb, A. Nudelman, B. M. Stoltz, J. E. Bercaw, K. I. Goldberg, *Organometallics*, **2010**, *29*, 2176.

[3] I. Paterson, S. M. Dalby, J. C. Roberts, G. J. Naylor, E. A. Guzmán, R. Isbrucker, T. P. Pitts, P. Linley, D. Divlianska, J. K. Reed, A. E. Wright, *Angew. Chem.* **2011**, *123*, 3277; *Angew. Chem. Int. Ed.* **2011**, *50*, 3219.

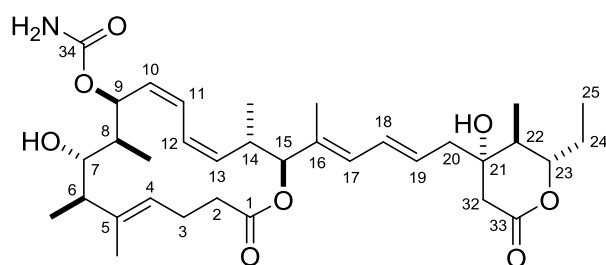

Figure 1. The numbering system for leiodermatolide (1)

## II. Detailed experimental procedures

### a. Synthesis of western fragment 2

Ketone **8a**

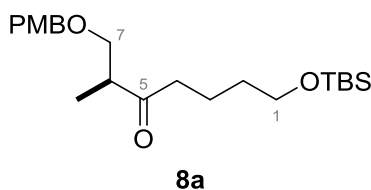

To a suspension of magnesium turnings (1.10 g, 45.0 mmol) in THF (20 mL) was added iodine (2 crystals, approx. 20 mg) and 1,2-dibromoethane (50  $\mu$ L) and the reaction stirred until it became colourless. A solution of TBSO(CH<sub>2</sub>)<sub>4</sub>Br<sup>[4]</sup> (11.5 g, 42.9 mmol) in THF (10 mL) was then added dropwise over 2 h and the reaction heated to reflux for 1 h to give a clear grey solution of the Grignard reagent.

Weinreb amide **8**<sup>[5]</sup> (4.58 g, 17.2 mmol, dried azeotropically with PhH) was dissolved in THF (25 mL) and cooled to  $-78$  °C. The solution of Grignard reagent was added *via* cannula (25 mL THF wash) over 1 h, the reaction warmed to 0 °C and stirred for 1.5 h. NH<sub>4</sub>Cl solution (10 mL) and water (30 mL) were added, the layers separated and the aqueous phase extracted with CH<sub>2</sub>Cl<sub>2</sub> (4  $\times$  100 mL). The combined organic extracts were dried (MgSO<sub>4</sub>), concentrated *in vacuo* and purified by flash column chromatography (EtOAc / PE 40–60 1:20  $\rightarrow$  1:4) to yield ketone **8a** as a colourless liquid (5.97 g, 15.1 mmol, 88%).

**R<sub>f</sub>** 0.6 (EtOAc / PE 40–60 1:20), **<sup>1</sup>H NMR** (400 MHz, CDCl<sub>3</sub>)  $\delta$ <sub>H</sub> 7.19 (2H, d,  $J$  = 8.7 Hz, ArH), 6.85 (2H, d,  $J$  = 8.7 Hz, ArH), 4.41 (1H, d,  $J$  = 11.6 Hz, OCH<sub>a</sub>H<sub>b</sub>PMP), 4.37 (1H, d,  $J$  = 11.6 Hz, OCH<sub>a</sub>H<sub>b</sub>PMP), 3.78 (3H, s, OMe), 3.58 (2H, t,  $J$  = 6.5 Hz, H1), 3.56 (1H, dd,  $J$  = 9.1, 7.8 Hz, H7a), 3.40 (1H, dd,  $J$  = 9.1, 5.5 Hz, H7b), 2.83

[4] P. Tauh, A. G. Fallis, *J. Org. Chem.*, **1999**, *64*, 6960.

[5] I. Paterson, G. J. Florence, K. Gerlach, J. P. Scott, *J. Am. Chem. Soc.* **2001**, *123*, 9535.

(1H, dqd,  $J = 7.8, 7.1, 5.5$  Hz, H6) 2.48 (2H, t,  $J = 7.3$  Hz, H4), 1.60 (2H, tt,  $J = 7.3, 7.1$  Hz, H3), 1.48 (2H, tt,  $J = 7.1, 6.5$  Hz, H2), 1.03 (3H, d,  $J = 7.1$  Hz, Me6), 0.87 (9H, s, Sit-BuMe<sub>2</sub>), 0.02 (6H, s, Sit-BuMe<sub>2</sub>); <sup>13</sup>C NMR (125 MHz, CDCl<sub>3</sub>)  $\delta_C$  213.1, 159.2, 130.2, 129.2, 113.8, 72.9, 72.0, 62.9, 55.2, 46.4, 41.8, 32.3, 26.0, 19.9, 18.3, 13.6, -5.3;  $[\alpha]_D^{20} +11.4$  ( $c$  1.1, CHCl<sub>3</sub>); IR (thin film / cm<sup>-1</sup>) 2931, 2857, 1714, 1613, 1586, 1523, 1463, 1361, 1302, 1248, 1173, 1094, 1037, 1006, 835, 755; HRMS (ESI) calc. for C<sub>22</sub>H<sub>39</sub>O<sub>4</sub>Si [M+H]<sup>+</sup> 395.2612, found 395.2613.

#### Vinyl triflate **4**

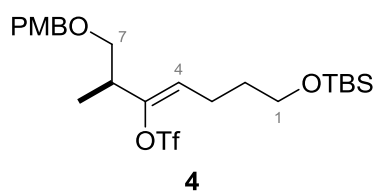

To a solution of hexamethyldisilazane (3.29 mL, 15.8 mmol) in THF (40 mL) at 0 °C was added *n*-butyllithium solution (1.50 M in hexanes, 8.42 mL, 12.6 mmol) and the solution stirred at 0 °C for 30 min before cooling to -78 °C. Ketone **8a** (4.16 g, 10.5 mmol) was dissolved in THF (40 mL), cooled to -78 °C and the cooled solution of LiHMDS added *via* cannula. The reaction was stirred at -78 °C for 1 h before addition of *N*-(5-chloro-2-pyridyl)triflimide (6.20 g, 15.8 mmol) in THF (40 mL) and stirred at -78 °C for a further 1 h before warming slowly to -30 °C over 2.5 h. Water (200 mL) was added, the layers separated and the aqueous phase extracted with EtOAc (3 × 100 mL). The combined organic extracts were dried (MgSO<sub>4</sub>), concentrated *in vacuo* and purified by flash column chromatography (EtOAc / PE 40–60 1:50 → 1:20) to give vinyl triflate **4** as a colourless oil (4.54 g, 8.61 mmol, 82%).

**R<sub>f</sub>** 0.43 (EtOAc / PE 40–60 1:10); <sup>1</sup>H NMR (500 MHz, CDCl<sub>3</sub>)  $\delta_H$  7.25 (2H, d,  $J = 8.6$  Hz, ArH), 6.90 (2H, d,  $J = 8.6$  Hz, ArH), 5.36 (1H, t,  $J = 7.3$  Hz, H4) 4.46 (2H, s, OCH<sub>2</sub>PMP), 3.83 (3H, s, OMe), 3.63 (2H, t,  $J = 6.3$  Hz, H1), 3.53 (1H, dd,  $J = 9.4, 5.3$  Hz, H7a), 3.38 (1H, dd,  $J = 9.4, 6.4$  Hz, H7b), 2.74 (1H, ddq,  $J = 6.8, 6.4, 5.3$  Hz, H6), 2.27 (2H, dt,  $J = 7.3, 7.3$  Hz, H3), 1.63 (2H, tt,  $J = 7.3, 6.3$  Hz, H2), 1.19 (3H, d,  $J = 6.8$  Hz, Me6), 0.91 (9H, s, Sit-BuMe<sub>2</sub>), 0.06 (6H, s, Sit-BuMe<sub>2</sub>); <sup>13</sup>C NMR (125 MHz, CDCl<sub>3</sub>)  $\delta_C$  159.2, 150.6, 130.1, 129.2, 128.3, 121.0, 118.6 (q,  $J = 319.5$  Hz), 113.8, 72.7, 71.5, 62.3, 55.3, 38.4, 31.8, 25.9, 22.5, 18.3, 15.6, -5.4;  $[\alpha]_D^{20} +11.3$  ( $c$

1.2, CHCl<sub>3</sub>); **IR** (thin film / cm<sup>-1</sup>) 2933, 2858, 1614, 1514, 1409, 1247, 1208, 1142, 1097, 906, 834, 776; **HRMS** (ESI) calc. for C<sub>23</sub>H<sub>41</sub>O<sub>6</sub>NF<sub>3</sub>SSi [M+NH<sub>4</sub>]<sup>+</sup> 544.2370, found 544.2362.

### Alkene **9**

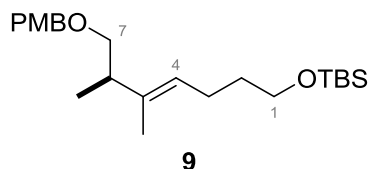

To a solution of vinyl triflate **4** (313 mg, 0.611 mmol) in 1,4-dioxane (10 mL) was added potassium carbonate (337 mg, 2.44 mmol), tetrakis(triphenylphosphine)palladium(0) (70.6 mg, 0.0611 mmol) and trimethylboroxine (0.128 mL, 0.920 mmol). The reaction was heated to 50 °C with stirring for 3 h before cooling to rt. The reaction mixture was filtered through a pad of Celite<sup>®</sup>, concentrated *in vacuo* and purified immediately by column chromatography (EtOAc / PE 40–60 1:20) to give alkene **9** as a colourless oil (224 mg, 0.572 mmol, 96%).

**R<sub>f</sub>** 0.24 (EtOAc / PE 40–60 1:20); **<sup>1</sup>H NMR** (500 MHz, CDCl<sub>3</sub>) δ<sub>H</sub> 7.25 (2H, d, *J* = 8.7 Hz, ArH), 6.87 (2H, d, *J* = 8.8 Hz, ArH), 5.20 (1H, t, *J* = 7.0 Hz, H<sub>4</sub>), 4.44 (2H, s, OCH<sub>2</sub>PMP), 3.80 (3H, s, OMe), 3.60 (2H, t, *J* = 6.5 Hz, H<sub>1</sub>), 3.41 (1H, dd, *J* = 9.4, 6.8 Hz, H<sub>7a</sub>), 3.25 (1H, dd, *J* = 9.3, 7.3 Hz, H<sub>7b</sub>), 2.42 (1H, ddq, *J* = 6.9, 6.9, 6.9 Hz, H<sub>6</sub>), 2.05 (2H, dt, *J* = 7.3, 7.3 Hz, H<sub>3</sub>), 1.57 (2H, m obs, H<sub>2</sub>), 1.57 (3H, s, Me<sub>5</sub>), 1.01 (3H, d, *J* = 7.0 Hz, Me<sub>6</sub>), 0.90 (9H, s, Si<sub>*t*</sub>-BuMe<sub>2</sub>), 0.05 (6H, s, Si<sub>*t*</sub>-BuMe<sub>2</sub>); **<sup>13</sup>C NMR** (125 MHz, CDCl<sub>3</sub>) δ<sub>C</sub> 159.2, 137.4, 131.0, 129.3, 124.6, 113.8, 74.0, 72.6, 62.8, 55.4, 42.6, 33.0, 26.1, 24.1, 18.5, 16.7, 13.6, -5.1; [α]<sub>D</sub><sup>20</sup> -10.0 (*c* 1.0, CHCl<sub>3</sub>); **IR** (thin film / cm<sup>-1</sup>) 2952, 2931, 2858, 1613, 1514, 1463, 1249, 1097, 1039, 835; **HRMS** (ESI) calc. for C<sub>23</sub>H<sub>44</sub>NO<sub>3</sub>Si [M+NH<sub>4</sub>]<sup>+</sup> 410.3085, found 410.3082.

## Alcohol **9d**

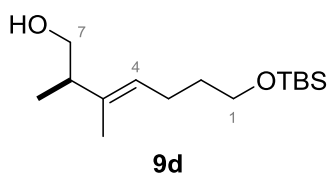

To a rapidly stirred solution of PMB ether **9** (2.59 g, 6.59 mmol) in CH<sub>2</sub>Cl<sub>2</sub> (36 mL) and pH 7 buffer (4 mL) at 0 °C was added DDQ (2.99 g, 13.2 mmol). The reaction was stirred at rt for 2 h, then quenched with NaHCO<sub>3</sub> solution (100 mL) and water (200 mL) until all the solids had dissolved. The mixture was extracted with CH<sub>2</sub>Cl<sub>2</sub> (4 × 70 mL), the combined organic phases dried (MgSO<sub>4</sub>) and concentrated *in vacuo*. The crude product was purified by column chromatography (CH<sub>2</sub>Cl<sub>2</sub> / PhMe 1:10 → 1:2) to yield alcohol **9d** as a yellow oil (1.51 g, 5.54 mmol, 84%).

**R<sub>f</sub>** 0.13 (EtOAc / PE 40–60 1:20); **<sup>1</sup>H NMR** (500 MHz, CDCl<sub>3</sub>) δ<sub>H</sub> 5.27 (1H, t, *J* = 7.1 Hz, H4), 3.60 (2H, t, *J* = 6.4 Hz, H1), 3.44 (2H, dd, *J* = 6.3, 6.3 Hz, H7), 2.31 (1H, ddq, *J* = 6.9, 6.9, 6.9 Hz, H6), 2.09 (2H, dt, *J* = 7.4, 7.4 Hz, H3), 1.56 (2H, m obs, H2), 1.56 (3H, s, Me5), 1.36 (1H, t, *J* = 6.0 Hz, OH), 0.98 (3H, d, *J* = 6.9 Hz, Me6), 0.89 (9H, s, *Sit*-*Bu*Me<sub>2</sub>), 0.04 (6H, s, *Sit*-*Bu*Me<sub>2</sub>); **<sup>13</sup>C NMR** (125 MHz, CDCl<sub>3</sub>) δ<sub>C</sub> 136.2, 126.9, 65.3, 62.7, 45.4, 33.0, 26.1, 24.2, 18.5, 15.6, 12.7, -5.1; **[α]<sub>D</sub><sup>20</sup>** +5.0 (*c* 1.0, CHCl<sub>3</sub>); **IR** (thin film / cm<sup>-1</sup>) 3352, 2956, 2929, 2859, 1472, 1464, 1388, 1255, 1101, 1036; **HRMS** (ESI) calc. for C<sub>15</sub>H<sub>32</sub>O<sub>2</sub>Si [M+H]<sup>+</sup> 273.2244, found 273.2249.

## Aldehyde **10**

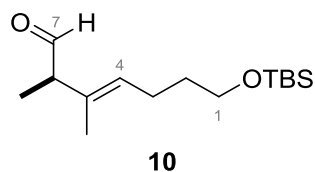

Alcohol **9d** (1.80 g, 6.64 mmol) was dissolved in CH<sub>2</sub>Cl<sub>2</sub> (175 mL) and cooled to 0 °C. NaHCO<sub>3</sub> (5.60 g, 66.4 mmol) and Dess–Martin periodinane (4.20 g, 9.96 mmol) were added and the reaction stirred at rt for 45 min. The reaction was recooled to 0 °C, Na<sub>2</sub>S<sub>2</sub>O<sub>3</sub> (150 mL) was added and the mixture stirred for 30 min at rt. The layers were separated and the aqueous portion extracted with CH<sub>2</sub>Cl<sub>2</sub> (4 × 100 mL), the combined organic extracts were dried (MgSO<sub>4</sub>) and concentrated *in vacuo*. Purification by flash



column chromatography (EtOAc / PE 40–60 1:50) gave aldehyde **10** as a colourless liquid (1.48 g, 5.47 mmol, 83%).

**R<sub>f</sub>** 0.42 (EtOAc / PE 40–60 1:20); **<sup>1</sup>H NMR** (500 MHz, CDCl<sub>3</sub>) δ<sub>H</sub> 9.49 (1H, s, H7), 5.31 (1H, t, *J* = 7.2 Hz, H4), 3.59 (2H, t, *J* = 6.4 Hz, H1), 2.95 (1H, q, *J* = 6.9 Hz, H6), 2.11 (2H, dt, *J* = 7.3, 7.3 Hz, H3), 1.58 (3H, s, Me5), 1.57 (2H, m obs, H2), 1.15 (3H, d, *J* = 6.9 Hz, Me6), 0.88 (9H, s, *Sit*-BuMe<sub>2</sub>), 0.03 (6H, s, *Sit*-BuMe<sub>2</sub>); **<sup>13</sup>C NMR** (125 MHz, CDCl<sub>3</sub>) δ<sub>C</sub> 202.3, 131.9, 129.5, 62.5, 55.9, 32.7, 26.1, 24.5, 18.4, 14.8, 12.3, –5.2; **[α]<sub>D</sub><sup>20</sup>** –131.3 (*c* 1.3, CHCl<sub>3</sub>); **IR** (thin film / cm<sup>–1</sup>) 2952, 2930, 2858, 1727, 1472, 1462, 1387, 1255, 1101, 835; **HRMS** (ESI) calc. for C<sub>15</sub>H<sub>31</sub>O<sub>2</sub>Si [M+H]<sup>+</sup> 271.2088, found 271.2086.

### Aldol adduct **11**

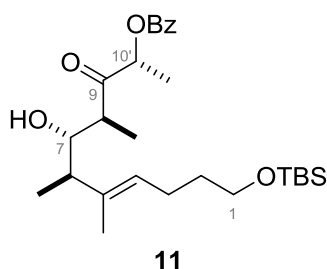

Ketone (*R*)-**7**<sup>[6]</sup> (1.02 g, 4.95 mmol) was dried azeotropically with PhH, dissolved in Et<sub>2</sub>O (8 mL) and stirred over CaH<sub>2</sub> for 30 min. Dicyclohexylboron chloride (1.02 mL, 4.26 mmol) was added to a solution of triethylamine (0.646 mL, 4.86 mmol) in Et<sub>2</sub>O (5 mL) at 0 °C and the clear solution stirred for 5 min. The solution of ketone was then added *via* cannula and the flask washed with Et<sub>2</sub>O (3 mL); the cloudy solution was stirred at 0 °C for 1 h before cooling to –78 °C. Aldehyde **10** (821 mg, 3.04 mmol) was dried azeotropically from PhH, dissolved in Et<sub>2</sub>O (5 mL) and stirred over CaH<sub>2</sub> for 30 min. This solution was added *via* cannula to the cooled enolate solution and the flask washed with Et<sub>2</sub>O (3 mL). The reaction was stirred at –78 °C for 3 h and –20 °C for 14 h. MeOH (10 mL) and pH 7 buffer solution (10 mL) were added at 0 °C, the layers separated and the aqueous phase extracted with Et<sub>2</sub>O (3 × 20 mL). The combined organic extracts were stirred over silica gel for 1 h, the silica was then removed by filtration and the solvent removed *in vacuo*. Purification by flash column chromatography (EtOAc / PE 40–60 1:50 → 1:10) gave aldol adduct **11** as a

[6] I. Paterson, D. J. Wallace, C. J. Cowden, *Synthesis* **1998**, 639.

colourless oil (1.39 g, 2.92 mmol, 96%) along with recovered ketone **7** (362 mg, 1.76 mmol).

**R<sub>f</sub>** 0.48 (EtOAc / PE 40–60 1:4); **<sup>1</sup>H NMR** (500 MHz, CDCl<sub>3</sub>)  $\delta_{\text{H}}$  8.09 (2H, d,  $J = 7.2$  Hz, ArH), 7.59 (1H, t,  $J = 7.4$  Hz, ArH), 7.47 (2H, dd,  $J = 7.7, 7.7$  Hz, ArH), 5.45 (1H, q,  $J = 6.9$  Hz, H10'), 5.20 (1H, t,  $J = 7.1$  Hz, H4), 3.59 (2H, t,  $J = 6.3$  Hz, H1), 2.97 (1H, dq,  $J = 7.1, 7.1$  Hz, H8), 2.29 (1H, d,  $J = 5.5$  Hz, OH), 2.27 (1H, m obs, H6), 2.10 (2H, m, H3), 1.60 (3H, s, Me5), 1.55 (3H, d,  $J = 7.4$  Hz, Me10'), 1.55 (2H, m, H2), 1.29 (3H, d,  $J = 7.1$  Hz, Me8), 1.05 (3H, d,  $J = 6.9$  Hz, Me6), 0.90 (9H, s, Si*t*-BuMe<sub>2</sub>), 0.05 (6H, s, Si*t*-BuMe<sub>2</sub>); **<sup>13</sup>C NMR** (125 MHz, CDCl<sub>3</sub>)  $\delta_{\text{C}}$  212.1, 165.7, 137.3, 133.3, 129.8, 129.6, 128.4, 126.3, 74.9, 74.7, 62.6, 44.8, 44.5, 32.8, 26.0, 24.1, 18.3, 15.9, 14.9, 14.5, 12.9, -5.3;  $[\alpha]_{\text{D}}^{20}$  -13.7 ( $c$  1.1, CHCl<sub>3</sub>); **IR** (thin film / cm<sup>-1</sup>) 3519, 2952, 2932, 2856, 1719, 1453, 1381, 1268, 1108, 1100; **HRMS** (ESI) calc. for C<sub>27</sub>H<sub>45</sub>O<sub>5</sub>Si [M+H]<sup>+</sup> 477.3031, found 477.3025.

#### TMS Ether **11g**

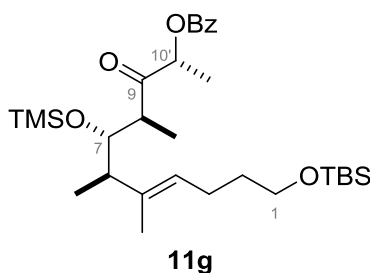

Aldol adduct **11** (1.39 g, 2.92 mmol) was dissolved in CH<sub>2</sub>Cl<sub>2</sub> (30 mL) and cooled to 0 °C, imidazole (594 mg, 8.73 mmol) then chlorotrimethylsilane (0.93 mL, 7.30 mmol) were added and the reaction stirred at rt for 30 min. The reaction was quenched with NH<sub>4</sub>Cl solution (20 mL), the layers separated and the aqueous phase extracted with CH<sub>2</sub>Cl<sub>2</sub> (3 × 20 mL). The combined organic extracts were dried (MgSO<sub>4</sub>) and concentrated *in vacuo* to give TMS ether **11g** as a colourless oil (1.53 g, 2.79 mmol, 96%) which was used without further purification.

**R<sub>f</sub>** 0.60 (EtOAc / PE 40–60 1:9); **<sup>1</sup>H NMR** (500 MHz, CDCl<sub>3</sub>)  $\delta_{\text{H}}$  8.07 (2H, dt,  $J = 8.3, 1.2$  Hz, ArH), 7.56 (1H, tt,  $J = 7.5, 1.2$  Hz, ArH), 7.44 (2H, dd,  $J = 7.8, 7.8$  Hz, ArH), 5.43 (1H, q,  $J = 7.0$  Hz, H10'), 5.14 (1H, t,  $J = 7.0$  Hz, H4), 3.99 (1H, dd,  $J = 8.7, 2.7$  Hz, H7), 3.59 (2H, t,  $J = 6.5$  Hz, H1), 3.07 (1H, dq,  $J = 8.1, 7.3$  Hz, H8), 2.15 (1H, q,

$J = 6.3$  Hz, H6), 2.08 (1H, ddt,  $J = 15.0, 7.6, 7.6$  Hz, H3a), 1.98 (1H, m, H3b), 1.61 (3H, s, Me5), 1.56 (2H, m, H2), 1.51 (3H, d,  $J = 6.9$  Hz, Me10'), 1.15 (3H, d,  $J = 7.0$  Hz, Me8), 0.95 (3H, d,  $J = 6.9$  Hz, Me6), 0.89 (9H, s, Si-BuMe<sub>2</sub>), 0.04 (6H, s, Si-BuMe<sub>2</sub>), -0.03 (9H, s, SiMe<sub>3</sub>); <sup>13</sup>C NMR (125 MHz, CDCl<sub>3</sub>)  $\delta_C$  209.3, 165.8, 136.5, 133.3, 129.92, 129.90, 128.5, 125.7, 75.6, 75.1, 62.9, 47.0, 43.5, 32.9, 26.1, 24.5, 18.4, 16.7, 15.5, 14.8, 12.1, 0.7, -5.2;  $[\alpha]_D^{20} +8.9$  ( $c$  1.3, CHCl<sub>3</sub>); IR (thin film / cm<sup>-1</sup>) 2594, 2932, 2858, 1723, 1452, 1379, 1264, 1249, 1109, 837; HRMS (ESI) calc. for C<sub>30</sub>H<sub>56</sub>O<sub>5</sub>NSi [M+NH<sub>4</sub>]<sup>+</sup> 566.3692, found 566.3687.

### Triol **11i**

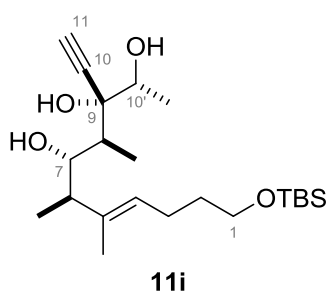

*n*-Butyllithium solution (1.6 M in hexanes, 11.6 mL, 18.6 mmol) was added dropwise to a solution of ethynyltrimethylsilane (3.29 mL, 23.3 mmol) in THF (22 mL) at 0 °C and stirred for 20 min. The reaction was cooled to -78 °C and a solution of ketone **11g** (1.28 g, 2.33 mmol) in THF (6.0 mL) was added *via* cannula. The reaction was stirred at -78 °C for 1 h then warmed to 0 °C and stirred for a further 4 h. NH<sub>4</sub>Cl solution (40 mL) was added, the layers separated and the aqueous phase extracted with Et<sub>2</sub>O (2 × 20 mL) and EtOAc (1 × 20 mL). The combined organic extracts were dried (Na<sub>2</sub>SO<sub>4</sub>) and concentrated *in vacuo*. The residue was dissolved in MeOH (20 mL), K<sub>2</sub>CO<sub>3</sub> (4.83 g, 35.0 mmol) was added and the reaction stirred for 16 h at rt. NH<sub>4</sub>Cl solution (20 mL) was added and the aqueous phase extracted with EtOAc (3 × 20 mL). The combined organic extracts were dried (Na<sub>2</sub>SO<sub>4</sub>), concentrated *in vacuo* and purified by column chromatography (EtOAc / PE 40–60 1:4 → 1:1) to give triol **11i** as a colourless oil (714 mg, 1.79 mmol, 77%).<sup>[7]</sup>

**R<sub>f</sub>** 0.35 (EtOAc / PE 40–60 1:2); <sup>1</sup>H NMR (500 MHz, CDCl<sub>3</sub>)  $\delta_H$  5.47 (1H, s, OH9), 5.28 (1H, t,  $J = 6.7$  Hz, H4), 3.95 (1H, d,  $J = 9.5$  Hz, H7), 3.88 (1H, dq,  $J = 8.5, 6.2$

[7] The (inconsequential) stereochemistry at C9 was confirmed by nOe analysis of an orthoacetate derivative of **11i**.

Hz, H10'), 3.61 (2H, t,  $J = 6.2$  Hz, H1), 2.66 (1H, d,  $J = 8.8$  Hz, OH10'), 2.48 (1H, s, H11), 2.43 (1H, br s, OH7), 2.35 (1H, m, H6), 2.13 (2H, m, H3), 1.80 (1H, dq,  $J = 9.7$ , 6.8 Hz, H8), 1.70 (3H, s, Me5), 1.58 (2H, tt,  $J = 6.8$ , 6.8 Hz, H2), 1.23 (3H, d,  $J = 6.2$  Hz, Me10'), 0.97 (3H, d,  $J = 6.9$  Hz, Me6), 0.91 (3H, d,  $J = 6.5$  Hz, Me8), 0.89 (9H, s, *Sit*-*Bu*Me<sub>2</sub>), 0.04 (6H, s, *Sit*-*Bu*Me<sub>2</sub>); <sup>13</sup>C NMR (125 MHz, CDCl<sub>3</sub>)  $\delta_C$  137.1, 126.6, 84.8, 77.2, 73.7, 73.3, 72.2, 62.6, 42.8, 40.5, 32.8, 26.0, 24.4, 18.4, 17.1, 16.1, 11.6, 10.1, -5.1, -5.3;  $[\alpha]_D^{20}$  +11.6 (*c* 2.0, CHCl<sub>3</sub>); IR (thin film / cm<sup>-1</sup>) 3310, 2928, 2859, 1721, 1427, 1256, 1103, 984, 836, 775; HRMS (ESI) calc. for C<sub>22</sub>H<sub>43</sub>O<sub>4</sub>Si [M+H]<sup>+</sup> 399.2925, found 399.2927.

## Ynone 12

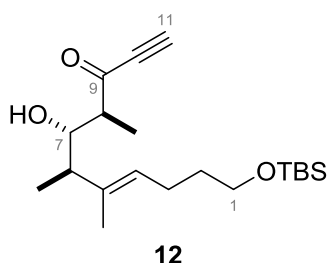

Triol **11i** (714 mg, 1.79 mmol) was dissolved in CH<sub>2</sub>Cl<sub>2</sub> (25 mL), silica supported sodium periodate (14.6 wt% NaIO<sub>4</sub>, 10.5 g, 7.16 mmol) was added and the reaction stirred for 1 h. The mixture was filtered, concentrated *in vacuo* to give ynone **12** as a yellow oil (570 mg, 1.62 mmol, 90%) which was used without further purification.

**R<sub>f</sub>** 0.50 (EtOAc / PE 40–60 1:4); <sup>1</sup>H NMR (400 MHz, CDCl<sub>3</sub>)  $\delta_H$  5.22 (1H, t,  $J = 7.1$  Hz, H4), 3.63 (1H, ddd,  $J = 6.2$ , 6.2, 6.2 Hz, H7), 3.59 (2H, t,  $J = 6.4$  Hz, H1), 3.26 (1H, s, H11), 2.79 (1H, qd,  $J = 7.2$ , 6.4 Hz, H8), 2.30 (1H, dq,  $J = 6.7$ , 6.7 Hz, H6), 2.14 (1H, d,  $J = 6.4$  Hz, OH), 2.06 (2H, dt,  $J = 7.4$ , 7.4 Hz, H3), 1.59 (3H, s, Me5), 1.55 (2H, tt,  $J = 7.0$ , 7.0 Hz, H2), 1.25 (3H, d,  $J = 7.3$  Hz, Me8), 1.04 (3H, d,  $J = 6.9$  Hz, Me6), 0.88 (9H, s, *Sit*-*Bu*Me<sub>2</sub>), 0.03 (6H, s, *Sit*-*Bu*Me<sub>2</sub>); <sup>13</sup>C NMR (100 MHz, CDCl<sub>3</sub>)  $\delta_C$  191.7, 137.2, 127.1, 81.4, 79.6, 75.2, 63.0, 51.1, 45.7, 33.1, 26.4, 24.5, 18.7, 14.8, 14.3, 13.7, -4.9;  $[\alpha]_D^{20}$  -24.9 (*c* 1.0, CHCl<sub>3</sub>); IR (thin film / cm<sup>-1</sup>) 3464, 3246, 2952, 2930, 2857, 2091, 1674, 1462, 1255, 1098; HRMS (ESI) calc. for C<sub>20</sub>H<sub>36</sub>O<sub>3</sub>SiNa [M+Na]<sup>+</sup> 375.2326, found 375.2327.

### Iodoenone **13**

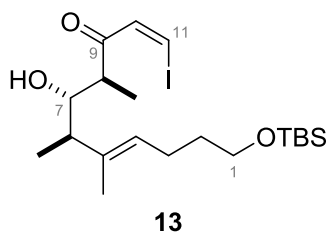

Ynone **12** (364 mg, 1.03 mmol) was dissolved in THF (1.72 mL), AcOH (103  $\mu$ L, 1.80 mmol) and sodium iodide (309 mg, 2.06 mmol) were added and the reaction was stirred in the dark at rt for 40 h. NaHCO<sub>3</sub> solution (2.0 mL) was added, the mixture was extracted with CH<sub>2</sub>Cl<sub>2</sub> (3  $\times$  5 mL), dried (Na<sub>2</sub>SO<sub>4</sub>) and concentrated *in vacuo*. Purification by flash column chromatography (EtOAc / PE 40–60 1:50  $\rightarrow$  1:18) gave the *Z*-iodoenone **13** as a yellow oil (398 mg, 828  $\mu$ mol, 81%) along with the *E*- isomer (41.4 mg, 86.2  $\mu$ mol, 8%).

**R<sub>f</sub>** 0.38 (EtOAc / PE 40–60 1:10); **<sup>1</sup>H NMR** (500 MHz, CDCl<sub>3</sub>)  $\delta$ <sub>H</sub> 7.32 (1H, d, *J* = 8.8 Hz, H11), 7.23 (1H, d, *J* = 8.8 Hz, H10), 5.14 (1H, t, *J* = 7.1 Hz, H4), 3.58 (2H, t, *J* = 6.4 Hz, H1), 3.51 (1H, ddd, *J* = 7.5, 7.5, 5.1 Hz, H7), 2.59 (1H, d, *J* = 7.8 Hz, OH), 2.27 (1H, dq, *J* = 7.0, 7.0 Hz, H6), 2.02 (1H, dt, *J* = 7.4, 7.4 Hz, H3), 1.55 (3H, s, Me5), 1.52 (2H, tt, *J* = 7.1, 7.1 Hz, H2), 1.21 (3H, d, *J* = 7.2 Hz, Me8), 1.08 (3H, d, *J* = 7.0 Hz, Me6), 0.89 (9H, s, *Sit*-BuMe<sub>2</sub>), 0.04 (6H, s, *Sit*-BuMe<sub>2</sub>); **<sup>13</sup>C NMR** (125 MHz, CDCl<sub>3</sub>)  $\delta$ <sub>C</sub> 204.3, 137.3, 135.2, 126.4, 91.7, 76.5, 62.6, 48.2, 46.7, 32.8, 26.1, 24.1, 18.3, 14.41, 14.36, 13.6, -5.3;  **$[\alpha]_D^{20}$**  +41.1 (*c* 1.3, CHCl<sub>3</sub>); **IR** (thin film / cm<sup>-1</sup>) 3497, 2930, 2857, 1684, 1565, 1460, 1256, 1102, 975, 836 776; **HRMS** (ESI) calc. for C<sub>20</sub>H<sub>38</sub>IO<sub>3</sub>Si [M+H]<sup>+</sup> 481.1629, found 481.1627.

### Diol **14**

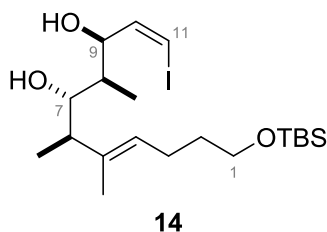

Me<sub>4</sub>NBH(OAc)<sub>3</sub> (1.88 g, 7.08 mmol) was dissolved in AcOH (8.0 mL) and MeCN (8.0 mL) and the solution stirred at 0 °C for 1 h before cooling to -30 °C. A solution of ketone **13** (340 mg, 708  $\mu$ mol) in MeCN (16 mL) was added *via* cannula and the

reaction stirred at  $-30\text{ }^{\circ}\text{C}$  in the dark for 40 h. The mixture was pipetted into  $\text{NaHCO}_3$  and Na/K tartrate solution (1:1, 20 mL) at  $0\text{ }^{\circ}\text{C}$  and stirred at rt for 30 min. The layers were separated and the aqueous phase extracted with EtOAc ( $4 \times 20\text{ mL}$ ), the combined organic extracts were washed with  $\text{NaHCO}_3$  solution (10 mL), dried ( $\text{Na}_2\text{SO}_4$ ) and concentrated *in vacuo*. Residual boronate was removed by co-evaporation with MeOH ( $4 \times 2\text{ mL}$ ) and the crude product was purified by flash column chromatography (EtOAc / PE 40–60 1:9  $\rightarrow$  1:4) to give diol **14** as a colourless oil (330 mg, 684  $\mu\text{mol}$ , 97%).

$R_f$  0.59 (EtOAc / PE 40–60 1:4),  $^1\text{H NMR}$  (500 MHz,  $\text{CDCl}_3$ )  $\delta_{\text{H}}$  6.39 (2H, m, H10, H11), 5.31 (1H, t,  $J = 7.2\text{ Hz}$ , H4), 4.63 (1H, dt,  $J = 2.0, 6.1\text{ Hz}$ , H9), 3.60 (3H, m, H1, OH), 3.56 (1H, m, H7), 2.36 (1H, dq,  $J = 6.5, 6.5\text{ Hz}$ , H6), 2.09 (1H, dt,  $J = 7.3, 7.3\text{ Hz}$ , H3), 1.99 (1H, dqd,  $J = 7.2, 7.2, 2.5\text{ Hz}$ , H8), 1.62 (3H, s, Me5), 1.57 (2H, tt,  $J = 7.2, 7.2\text{ Hz}$ , H2), 1.03 (3H, d,  $J = 7.0\text{ Hz}$ , Me6), 0.97 (3H, d,  $J = 7.2\text{ Hz}$ , Me8), 0.89 (9H, s,  $\text{Si}t\text{-BuMe}_2$ ), 0.04 (6H, s,  $\text{Si}t\text{-BuMe}_2$ );  $^{13}\text{C NMR}$  (125 MHz,  $\text{CDCl}_3$ )  $\delta_{\text{C}}$  141.2, 137.1, 126.5, 82.7, 76.5, 75.0, 62.6, 44.2, 39.3, 32.8, 26.0, 24.3, 18.4, 15.7, 12.6, 12.2,  $-5.3$ ;  $[\alpha]_{\text{D}}^{20} +20.5$  ( $c$  0.9,  $\text{CH}_2\text{Cl}_2$ ); **IR** (thin film /  $\text{cm}^{-1}$ ) 3354, 2929, 2342, 1462, 1255, 1103, 967, 836, 775; **HRMS** (ESI) calc. for  $\text{C}_{20}\text{H}_{39}\text{O}_3\text{INaSi}$   $[\text{M}+\text{Na}]^+$  505.1605, found 505.1600.

#### Acetonide **14m**

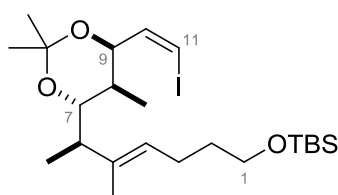

**14m**

Diol **14** (27 mg, 56.0  $\mu\text{mol}$ ) was dissolved in 2,2-dimethoxypropane (1 mL) and  $\text{CH}_2\text{Cl}_2$  (2 mL) and pyridinium *para*-toluenesulfonate (several crystals) was added. The reaction was stirred at rt for 1.5 h, concentrated *in vacuo* and purified by flash column chromatography (EtOAc / PE 40–60 1:12) to give acetonide **14m** as a colourless oil (29.1 mg, 55.6  $\mu\text{mol}$ , 99%).

$R_f$  0.55 (EtOAc / PE 40–60 1:10),  $^1\text{H NMR}$  (500 MHz,  $\text{CDCl}_3$ )  $\delta_{\text{H}}$  6.35 (1H, d,  $J = 7.4\text{ Hz}$ , H11), 6.30 (1H, dd,  $J = 7.4, 7.4\text{ Hz}$ , H10), 5.27 (1H, t,  $J = 7.3\text{ Hz}$ , H4), 4.61

(1H, dd,  $J = 7.1, 4.9$  Hz, H9), 3.60 (3H, t,  $J = 6.6$  Hz, H1), 3.27 (1H, dd,  $J = 6.8, 6.8$  Hz, H7), 2.21 (1H, dq,  $J = 6.8, 6.8$  Hz, H6), 2.03 (3H, m, H8, H3), 1.58 (3H, s, Me5), 1.56 (2H, m obs, H2), 1.40 (3H, s, acetonide), 1.34 (3H, s, acetonide), 1.07 (3H, d,  $J = 6.9$  Hz, Me6), 0.89 (9H, s, *Sit*-BuMe<sub>2</sub>), 0.81 (3H, d,  $J = 6.8$  Hz, Me8), 0.04 (6H, s, *Sit*-BuMe<sub>2</sub>); <sup>13</sup>C NMR (125 MHz, CDCl<sub>3</sub>)  $\delta_C$  139.8, 137.0, 126.0, 100.5, 81.7, 76.9, 73.4, 62.7, 47.2, 37.1, 32.8, 26.0, 25.7, 24.0, 23.8, 18.4, 14.9, 13.7, 13.1, -5.2;  $[\alpha]_D^{20}$  +16.6 ( $c$  0.30, CHCl<sub>3</sub>); IR (thin film / cm<sup>-1</sup>) 2930, 2859, 1461, 1378, 1226, 1106, 1017, 836, 774; HRMS (ESI) calc. for C<sub>23</sub>H<sub>44</sub>O<sub>3</sub>ISi [M+H]<sup>+</sup> 523.2099, found 523.2094.

### Vinyl stannane **2**

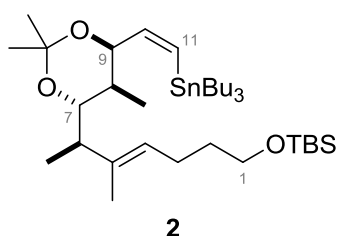

Tributyltin chloride (36  $\mu$ L, 133  $\mu$ mol) was added to a solution of vinyl iodide **14m** (17.4 mg, 33.0  $\mu$ mol) in Et<sub>2</sub>O (2 mL) and the solution cooled to -78 °C. *t*-Butyllithium solution (1.7 M in pentane, 116  $\mu$ L, 198  $\mu$ mol) was added dropwise and the reaction stirred for 30 min before being quenched with NH<sub>4</sub>Cl solution (2.5 mL) and immediately warmed to rt. The layers were separated and the aqueous phase extracted with CH<sub>2</sub>Cl<sub>2</sub> (3  $\times$  3 mL), the combined organic extracts were dried (MgSO<sub>4</sub>) and concentrated *in vacuo*. Purification by flash column chromatography (Et<sub>3</sub>N washed silica gel, EtOAc / PE 40–60 0:1  $\rightarrow$  1:10) gave vinyl stannane **2** as a colourless oil (18.3 mg, 26.7  $\mu$ mol, 81%).

**R<sub>f</sub>** 0.9 (EtOAc / PE 40–60 1:20); <sup>1</sup>H NMR (500 MHz, CDCl<sub>3</sub>)  $\delta_H$  6.42\* (1H, dd,  $J = 13.4, 6.6$  Hz, H10), 5.97\* (1H, dd,  $J = 13.4, 0.9$  Hz, H11), 5.23 (1H, t,  $J = 7.0$  Hz, H4), 4.27 (1H, ddd,  $J = 6.7, 4.2, 0.9$  Hz, H9), 3.59 (3H, t,  $J = 6.5$  Hz, H1), 3.20 (1H, dd,  $J = 7.0, 7.0$  Hz, H7), 2.14 (1H, qd,  $J = 7.0, 7.0$  Hz, H6), 2.03 (2H, dt,  $J = 7.3, 7.3$  Hz, H3), 1.79 (1H, dqd,  $J = 7.1, 7.1, 5.0$  Hz, H8), 1.56 (3H, s, Me5), 1.57–1.46 (8H, m, H2, SnBu<sub>3</sub>), 1.34 (6H, s, acetonide), 1.31 (6H, m, SnBu<sub>3</sub>), 1.04 (3H, d,  $J = 6.8$  Hz, Me6), 0.93–0.87 (24H, m, SnBu<sub>3</sub>, *Sit*-BuMe<sub>2</sub>), 0.77 (3H, d,  $J = 6.9$  Hz, Me8), 0.04

\* These peaks show satellites due to coupling to <sup>117</sup>Sn and <sup>119</sup>Sn.

(6H, s, *Sit*-BuMe<sub>2</sub>); <sup>13</sup>C NMR (125 MHz, CDCl<sub>3</sub>) δ<sub>C</sub> 145.7, 137.1, 129.1, 125.8, 100.5, 76.9, 73.0, 62.7, 47.5, 39.6, 32.8, 29.2, 27.4, 26.0, 25.7, 24.0, 23.8, 18.4, 14.9, 13.74, 13.70, 13.1, 10.9, -5.3; [α]<sub>D</sub><sup>20</sup> +13.8 (*c* 0.18, CHCl<sub>3</sub>); IR (thin film / cm<sup>-1</sup>) 2958, 2931, 2858, 1464, 1378, 1256, 1225, 1104, 836, 775; HRMS (ESI) calc. for C<sub>35</sub>H<sub>74</sub>NO<sub>3</sub>SiSn [M+NH<sub>4</sub>]<sup>+</sup> 701.4476, found 701.4124.

## b. Synthesis of eastern fragment 3

### Aldol adduct 16

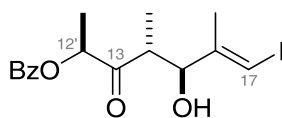

**16**

A solution of ketone (*S*)-**7**<sup>[6]</sup> (3.46 g, 16.8 mmol, dried azeotropically with PhH) in Et<sub>2</sub>O (5.0 mL) was dried over CaH<sub>2</sub> for 5 min. In a separate flask, dicyclohexylboron chloride (3.43 mL, 15.7 mmol) was added to a solution of triethylamine (2.81 mL, 20.1 mmol) in Et<sub>2</sub>O (10 mL) at 0 °C. The solution of ketone (*S*)-**7** was then added *via* cannula (2 × 2.5 mL Et<sub>2</sub>O wash) to the clear mixture and the resultant cloudy suspension was stirred at 0 °C for 1 h before cooling to -78 °C. Freshly prepared aldehyde **15**<sup>[8]</sup> (*ca.* 1.64 g, 8.39 mmol) in Et<sub>2</sub>O (*ca.* 20 mL) was added *via* cannula (4 × 5.0 mL Et<sub>2</sub>O wash) and the reaction stirred at -78 °C for 6 h before warming to -20 °C for 10 h. MeOH (20 mL) and pH 7 buffer solution (20 mL) were added at 0 °C, the layers separated and the aqueous phase was extracted with Et<sub>2</sub>O (4 × 50 mL). The combined organic extracts were stirred over silica gel for 30 min, filtered, dried (Na<sub>2</sub>SO<sub>4</sub>) and concentrated *in vacuo*. Purification by flash column chromatography (EtOAc / PE 40–60 0:1 → 1:7) gave aldol adduct **16** as a white crystalline solid (3.04 g, 7.55 mmol, 90%).

**R<sub>f</sub>** 0.26 (EtOAc / PE 40–60 1:4); **Melting point** 126–127 °C; <sup>1</sup>H NMR (500 MHz, CDCl<sub>3</sub>) δ<sub>H</sub> 8.08 (2H, d, *J* = 7.2 Hz, ArH), 7.59 (1H, t, *J* = 7.4 Hz, ArH), 7.46 (2H, dd, *J* = 7.7, 7.7 Hz, ArH), 6.34 (1H, s, H17), 5.43 (1H, q, *J* = 7.0 Hz, H12'), 4.41 (1H, dd, *J* = 8.9, 4.4 Hz, H15), 3.05 (1H, dq, *J* = 8.8, 7.2 Hz, H14), 2.30 (1H, d, *J* = 4.4 Hz, OH), 1.82 (3H, s, Me16), 1.57 (3H, d, *J* = 7.0 Hz, Me12'), 1.08 (3H, d, *J* = 7.1 Hz,

[8] a) R. Baker, J. L. Castro, *J. Chem. Soc., Perkin Trans. 1* **1990**, 47; b) J. D. White, P. R. Blakemore, N. J. Green, E. B. Hauser, M. A. Holoboski, L. E. Keown, C. S. Nylund Kolz, B. W. Phillips, *J. Org. Chem.* **2002**, 67, 7750.



Me14);  $^{13}\text{C}$  NMR (100 MHz,  $\text{CDCl}_3$ )  $\delta_{\text{C}}$  210.5, 166.0, 147.5, 133.5, 129.9, 129.5, 128.6, 81.2, 78.8, 75.0, 45.6, 18.9, 15.6, 14.5;  $[\alpha]_{\text{D}}^{20}$  +40.3 (*c* 1.0,  $\text{CHCl}_3$ ); IR (thin film /  $\text{cm}^{-1}$ ) 3499, 2992, 2939, 1733, 1699, 1451, 1385, 1317, 1286, 1271; HRMS (ESI) calc. for  $\text{C}_{16}\text{H}_{20}\text{O}_4\text{I}$   $[\text{M}+\text{H}]^+$  403.0401, found 403.0402.

#### TBS ether **16b**

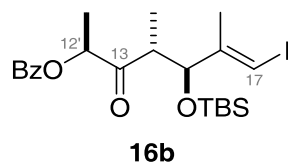

2,6-Lutidine (2.20 mL, 18.9 mmol) and TBSOTf (2.17 mL, 9.43 mmol) were added to a solution of aldol adduct **16** (1.27 g, 3.15 mmol) in  $\text{CH}_2\text{Cl}_2$  (15 mL) at  $-78$  °C. After stirring at  $-78$  °C for 2 h, further 2,6-lutidine (2.20 mL, 18.9 mmol) and TBSOTf (2.17 mL, 9.43 mmol) were added. After stirring at  $-78$  °C for a further 1h, the reaction was quenched by the addition of MeOH (20 mL) followed by  $\text{NaHCO}_3$  solution (40 mL). Upon warming up to rt, the layers were separated and the aqueous phase was extracted with  $\text{CH}_2\text{Cl}_2$  ( $3 \times 50$  mL). The combined organic extracts were dried ( $\text{MgSO}_4$ ) and concentrated *in vacuo*. Purification by flash column chromatography (EtOAc / PE 40–60 0:1  $\rightarrow$  1:7) gave TBS ether **16b** as a colourless liquid (1.62 g, 3.13 mmol, 99%).

$R_f$  0.53 (EtOAc / PE 40–60 1:4);  $^1\text{H}$  NMR (500 MHz,  $\text{CDCl}_3$ )  $\delta_{\text{H}}$  8.07 (2H, d,  $J = 7.4$  Hz, ArH), 7.58 (1H, t,  $J = 7.4$  Hz, ArH), 7.45 (2H, dd,  $J = 7.7, 7.7$  Hz, ArH), 6.26 (1H, s, H17), 5.42 (1H, q,  $J = 7.0$  Hz, H12'), 4.44 (1H, d,  $J = 9.7$  Hz, H15), 3.00 (1H, dq,  $J = 9.4, 7.2$  Hz, H14), 1.77 (3H, s, Me16), 1.54 (3H, d,  $J = 7.0$  Hz, Me12'), 0.96 (3H, d,  $J = 7.1$  Hz, Me14), 0.81 (9H, s,  $\text{Si}t\text{-BuMe}_2$ ),  $-0.02$  (3H, s,  $\text{Si}t\text{-BuMe}_a$ ),  $-0.04$  (3H, s,  $\text{Si}t\text{-BuMe}_b$ );  $^{13}\text{C}$  NMR (125 MHz,  $\text{CDCl}_3$ )  $\delta_{\text{C}}$  208.5, 165.8, 147.9, 133.4, 129.9, 129.7, 128.6, 80.7, 79.7, 75.2, 46.6, 25.8, 18.6, 18.2, 15.4, 14.4,  $-5.0$ ,  $-5.1$ ;  $[\alpha]_{\text{D}}^{20}$  +6.1 (*c* 1.0,  $\text{CHCl}_3$ ); IR (thin film /  $\text{cm}^{-1}$ ) 2957, 2931, 2858, 1722, 1604, 1452, 1266, 1116, 1070, 1000, 855, 836, 778, 771; HRMS (ESI) calc. for  $\text{C}_{22}\text{H}_{34}\text{O}_4\text{ISi}$   $[\text{M}+\text{H}]^+$  517.1266, found 517.1263.

## Benzoate **16c**

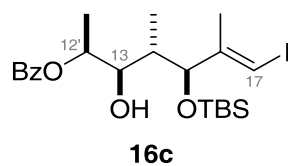

Lithium aluminium hydride (237 mg, 6.25 mmol) was added to a solution of TBS protected aldol adduct **16b** (1.62 g, 3.13 mmol) in Et<sub>2</sub>O (5 mL) at -78 °C. After stirring at -78 °C for 30 min, the reaction was quenched by the addition of acetone (5 mL) followed by NH<sub>4</sub>Cl solution (5 mL). Upon warming up to rt, the layers were separated and the aqueous portion extracted with Et<sub>2</sub>O (3 × 50 mL). The combined organic extracts were dried (Na<sub>2</sub>SO<sub>4</sub>) and concentrated *in vacuo* to give benzoate **16c** as a colourless liquid (1.60 g, 3.08 mmol, crude 98%, >20:1 dr at C13) to be used without further purification.

A portion was further purified by flash column chromatography (EtOAc/PE 40–60 0:1 → 1:20) to provide a sample for characterisation:

**R<sub>f</sub>** 0.45 (EtOAc / PE 40–60 1:4); **<sup>1</sup>H NMR** (400 MHz, CDCl<sub>3</sub>) δ<sub>H</sub> 8.07 (2H, d, *J* = 8.2 Hz, ArH), 7.55 (1H, t, *J* = 7.4 Hz, ArH), 7.43 (2H, dd, *J* = 7.6, 7.6 Hz, ArH), 6.25 (1H, s, H17), 5.28 (1H, qd, *J* = 6.3, 3.0 Hz, H12'), 4.22 (1H, d, *J* = 8.2 Hz, H15), 3.83 (1H, td, *J* = 8.0, 2.4 Hz, H13), 3.80 (1H, s, OH), 1.80 (1H, m obs, H14), 1.78 (3H, s, Me16), 1.37 (3H, d, *J* = 6.4 Hz, Me12'), 0.90 (9H, s, Si-BuMe<sub>2</sub>), 0.81 (3H, d, *J* = 7.0 Hz, Me14), 0.10 (3H, s, Si-BuMe<sub>a</sub>Me<sub>b</sub>), 0.02 (3H, s, Si-BuMe<sub>a</sub>Me<sub>b</sub>); **<sup>13</sup>C NMR** (100 MHz, CDCl<sub>3</sub>) δ<sub>C</sub> 166.3, 148.3, 133.0, 130.7, 129.8, 128.4, 83.4, 81.0, 75.8, 72.8, 40.1, 25.9, 19.7, 18.2, 13.3, 13.0, -4.6, -5.2; [**α**]<sub>D</sub><sup>20</sup> +5.1 (*c* 1.0, CHCl<sub>3</sub>); **IR** (thin film / cm<sup>-1</sup>) 3506, 2956, 2931, 2858, 1715, 1452, 1275, 1069, 1027, 835; **HRMS** (ESI) calc. for C<sub>22</sub>H<sub>36</sub>O<sub>4</sub>ISi [M+H]<sup>+</sup> 519.1422, found 519.1412.

## Diol **5**

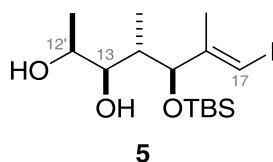

K<sub>2</sub>CO<sub>3</sub> (869 mg, 6.25 mmol) was added to a solution of ester **16c** (1.60 g, 3.08 mmol) in MeOH (30 mL). The reaction was allowed to stir at rt for 2 h before it was quenched by the addition of NH<sub>4</sub>Cl (10 mL) at 0 °C. The layers were separated and

the aqueous phase was extracted with CH<sub>2</sub>Cl<sub>2</sub> (3 × 50 mL). The combined organic extracts were dried (Na<sub>2</sub>SO<sub>4</sub>) and concentrated *in vacuo*. Purification by flash column chromatography (EtOAc / PE 40–60 0:1 → 1:7) gave diol **5** as a colourless oil (1.19 g, 2.89 mmol, 92% over 2 steps).

**R<sub>f</sub>** 0.26 (EtOAc / PE 40–60 1:4); **<sup>1</sup>H NMR** (500 MHz, CDCl<sub>3</sub>) δ<sub>H</sub> 6.24 (1H, s, H17), 4.14 (1H, d, *J* = 8.6 Hz, H15), 3.91 (1H, dd, *J* = 1.7, 0.6 Hz, OH13), 3.79 (1H, dqdd, *J* = 9.1, 6.3, 3.5, 0.6 Hz, H12'), 3.63 (1H, ddd, *J* = 8.2, 3.5, 1.8 Hz, H13), 2.51 (1H, d, *J* = 9.1 Hz, OH12'), 1.79 (3H, d, *J* = 1.1 Hz, Me16), 1.71 (1H, tq, *J* = 8.4, 7.0 Hz, H14), 1.16 (3H, d, *J* = 6.4 Hz, Me12'), 0.91 (9H, s, Si*t*-BuMe<sub>2</sub>), 0.68 (3H, d, *J* = 6.9 Hz, Me14), 0.12 (3H, s, Si*t*-BuMe<sub>a</sub>Me<sub>b</sub>), 0.03 (3H, s, Si*t*-BuMe<sub>a</sub>Me<sub>b</sub>); **<sup>13</sup>C NMR** (125 MHz, CDCl<sub>3</sub>) δ<sub>C</sub> 148.4, 84.1, 80.9, 77.6, 68.5, 39.4, 25.9, 19.5, 18.2, 16.3, 12.7, -4.5, -5.2; **[α]<sub>D</sub><sup>20</sup>** +36.5 (*c* 1.0, CHCl<sub>3</sub>); **IR** (thin film / cm<sup>-1</sup>) 3442, 2954, 2930, 2857, 1615, 1472, 1379, 1258, 1072, 1040, 837, 777; **HRMS** (ESI) calc. for C<sub>15</sub>H<sub>31</sub>O<sub>4</sub>INaSi [M+Na]<sup>+</sup> 437.0979, found 437.0979.

### Ketone **18**

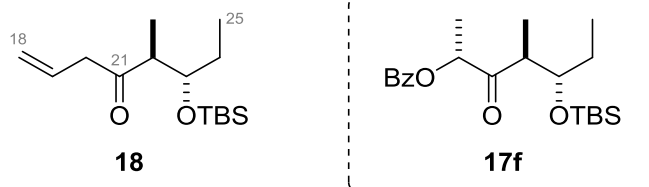

Allylmagnesium bromide solution (1 M in Et<sub>2</sub>O, 19.5 mL, 19.5 mmol) was added dropwise to a stirred solution of TBS ether **17f**<sup>[9]</sup> (2.10 g, 5.56 mmol) in THF (25 mL) at -78 °C over 5 min. The reaction was stirred for 1.5 h before being quenched at -78 °C with NH<sub>4</sub>Cl (10 mL) and warmed to rt. The organic phase was separated, the aqueous phase extracted with Et<sub>2</sub>O (3 × 30 mL), and the combined organic extracts concentrated *in vacuo*. The crude diol was dissolved in MeOH / pH 7 buffer (3:1, 20 mL), NaIO<sub>4</sub> (3.57 g, 16.7 mmol) added, and the reaction mixture stirred at rt for 16 h. H<sub>2</sub>O (20 mL) was added and the MeOH removed *in vacuo*. The mixture was extracted with CH<sub>2</sub>Cl<sub>2</sub> (3 × 30 mL) and the combined organic extracts were dried (MgSO<sub>4</sub>) and concentrated *in vacuo*. Purification by flash column chromatography (EtOAc / PE 40–60 1:30) afforded ketone **18** (1.27 g, 4.70 mmol, 85% over 2 steps) as a pale yellow oil.

[9] S. Crossman, M. V. Perkins, *J. Org. Chem.* **2006**, *71*, 117.

$R_f$  0.56 (EtOAc / PE 40–60 1:10);  $^1\text{H NMR}$  (500 MHz,  $\text{CDCl}_3$ )  $\delta_{\text{H}}$  5.93 (1H, ddt,  $J = 17.1, 10.2, 6.9$  Hz, H19), 5.16 (1H, d,  $J = 10.2$  Hz, H18a), 5.10 (1H, d,  $J = 17.1$  Hz, H18b), 3.90 (1H, dt,  $J = 7.7, 4.3$  Hz, H23), 3.27–3.23 (2H, m, H20), 2.80 (1H, dq,  $J = 7.2, 7.2$  Hz, H22), 1.48 (2H, m, H24), 0.97 (3H, d,  $J = 7.0$  Hz, Me22), 0.89 (3H, t,  $J = 7.3$  Hz, H25), 0.86 (9H, s,  $\text{Si}t\text{-BuMe}_2$ ), 0.04 (3H, s,  $\text{Si}t\text{-BuMe}_a$ ),  $-0.01$  (3H, s,  $\text{Si}t\text{-BuMe}_b$ );  $^{13}\text{C NMR}$  (125 MHz,  $\text{CDCl}_3$ )  $\delta_{\text{C}}$  211.9, 130.9, 118.6, 74.7, 49.9, 48.7, 26.3, 26.0, 18.2, 12.8, 7.8,  $-4.4, -4.7$ ;  $[\alpha]_{\text{D}}^{20} +65.6$  ( $c$  1.9,  $\text{CHCl}_3$ ); **IR** (thin film /  $\text{cm}^{-1}$ ) 2958, 2932, 2858, 1719, 1463, 1256, 1122, 1071, 1040, 1005, 836, 776; **HRMS** (ESI) calc. for  $\text{C}_{15}\text{H}_{30}\text{SiO}_2\text{Na}$   $[\text{M}+\text{Na}]^+$  293.1907, found 293.1893.

### Aldol adduct **18i**

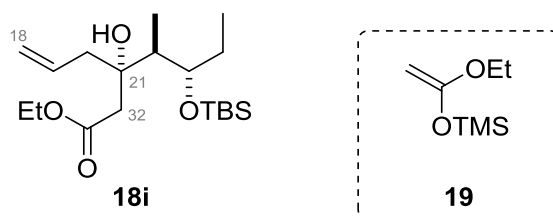

To a stirred solution of ketone **18** (500 mg, 1.85 mmol) in  $\text{CH}_2\text{Cl}_2$  (10 mL) at  $-78$  °C was added silyl ketene acetal **19** (600  $\mu\text{L}$ , 3.70 mmol), followed by  $\text{BF}_3 \cdot \text{Et}_2\text{O}$  (350  $\mu\text{L}$ , 2.78 mmol). The solution was stirred at  $-78$  °C for 1.5 h before being quenched with  $\text{NaHCO}_3$  (5 mL) and warmed to rt. The organic phase was separated, and the aqueous phase extracted with  $\text{CH}_2\text{Cl}_2$  ( $3 \times 10$  mL). The combined organic extracts were dried ( $\text{MgSO}_4$ ) and concentrated *in vacuo*. Purification by flash column chromatography (EtOAc / PE 40–60 1:30  $\rightarrow$  1:20) afforded ester **18i** (577 mg, 1.61 mmol, 87%) as a colourless oil.

Alternatively, the reaction was carried out with ketone **18** (881 mg, 3.26 mmol) and silyl ketene acetal **19** (2.61 mL, 16.3 mmol) in  $\text{CH}_2\text{Cl}_2$  (15 mL) under the same conditions and the crude product was used in the subsequent step without further purification.

$R_f$  0.39 (EtOAc / PE 40–60 1:15);  $^1\text{H NMR}$  (500 MHz,  $\text{CDCl}_3$ )  $\delta_{\text{H}}$  5.95 (1H, m, H19), 5.11 (1H, d,  $J = 10.0$  Hz, H18a), 5.10 (1H, d,  $J = 17.3$  Hz, H18b), 4.55 (1H, s, OH), 4.14 (2H, q,  $J = 7.1$  Hz,  $\text{CH}_3\text{CH}_2\text{O}$ ), 3.94 (1H, ddd,  $J = 5.6, 5.6, 4.7$  Hz, H23), 2.61

(1H, d,  $J = 14.2$  Hz, H32a), 2.50 (1H, dd,  $J = 14.5, 6.3$  Hz, H20a), 2.44 (1H, d,  $J = 14.2$  Hz, H32b), 2.38 (1H, dd,  $J = 14.4, 8.0$  Hz, H20b), 1.93 (1H, dq,  $J = 7.0, 7.0$  Hz, H22), 1.65 (1H, m, H24a), 1.55 (1H, m, H24b), 1.26 (3H, t,  $J = 7.1$  Hz, CH<sub>3</sub>CH<sub>2</sub>O), 0.91 (9H, s, *Sit*-BuMe<sub>2</sub>), 0.89 (3H, obs, H25), 0.83 (3H, d,  $J = 7.1$  Hz, Me22), 0.13 (3H, s, *Sit*-BuMe<sub>a</sub>Me<sub>b</sub>), 0.11 (3H, s, *Sit*-BuMe<sub>a</sub>Me<sub>b</sub>); <sup>13</sup>C NMR (125 MHz, CDCl<sub>3</sub>) δ<sub>C</sub> 172.6, 134.3, 117.9, 75.9, 75.4, 60.6, 43.2, 43.0, 41.5, 26.6, 26.1, 18.2, 14.3, 11.1, 8.5, -3.8, -4.5; [α]<sub>D</sub><sup>20</sup> -9.0 (*c* 2.3, CHCl<sub>3</sub>); IR (thin film / cm<sup>-1</sup>) 3486, 2957, 2932, 2858, 1733, 1714, 1464, 1373, 1336, 1255, 1191, 1055, 1005, 836, 774; HRMS (ESI) calc. for C<sub>19</sub>H<sub>38</sub>SiO<sub>4</sub>Na [M+Na]<sup>+</sup> 381.2432, found 381.2433.

### Lactone **20**

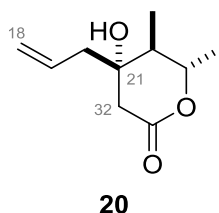

To a stirred solution of ester **18i** (274 mg, 765 μmol) in THF / MeOH (3:2, 5.0 mL) at rt was added HCl (3 M aq., 2.0 mL). The mixture was stirred for 1.5 h, then cooled to 0 °C and quenched with NaHCO<sub>3</sub> (3 mL). The organic phase was separated, and the aqueous phase extracted with CH<sub>2</sub>Cl<sub>2</sub> (3 × 10 mL). The combined organic extracts were dried (MgSO<sub>4</sub>) and concentrated *in vacuo*. Purification by flash column chromatography (EtOAc / PE 40–60 1:10 → 1:3) afforded lactone **20**<sup>[10]</sup> (142 mg, 717 μmol, 94%) as a white crystalline solid.

Alternatively, the reaction was carried out with crude aldol adduct **18f** in THF (9.0 mL) and MeOH (6.0 mL) under the same conditions and the crude product was used in the subsequent step without further purification.

**R<sub>f</sub>** 0.21 (EtOAc / PE 40–60 1:2); **Melting point** 56–58 °C; **<sup>1</sup>H NMR** (500 MHz, CDCl<sub>3</sub>) δ<sub>H</sub> 5.86 (1H, dddd,  $J = 17.2, 10.1, 7.4, 7.4$  Hz, H19), 5.28 (1H, d,  $J = 10.1$  Hz,

[10] Previously reported NMR data were recorded with C<sub>6</sub>D<sub>6</sub> as a solvent and our data recorded in C<sub>6</sub>D<sub>6</sub> were consistent, see: J. Willwacher, N. Kausch-Busies, A. Fürstner, *Angew. Chem.* **2012**, *124*, 12207; *Angew. Chem. Int. Ed.* **2012**, *51*, 12041.

The enantiomeric lactone *ent*-**20** was also prepared analogously from (*S*)-**7** with identical spectroscopic data with the exception of [α]<sub>D</sub><sup>20</sup> = -5.4 (*c* 3.09, CHCl<sub>3</sub>).

H18a), 5.20 (1H, d,  $J = 17.1$  Hz, H18b), 3.94 (1H, ddd,  $J = 10.0, 7.3, 2.9$  Hz, H23), 2.78 (1H, d,  $J = 16.7$  Hz, H26a), 2.38 (1H, d,  $J = 16.9$  Hz, H26b), 2.33 (1H, dd,  $J = 13.9, 7.5$  Hz, H20a), 2.16 (1H, dd,  $J = 13.8, 7.2$  Hz, H20b), 2.14 (1H, obs, OH), 1.92 (1H, dq,  $J = 10.0, 6.9$  Hz, H22), 1.85 (1H, dqd,  $J = 14.8, 7.3, 3.1$  Hz, H24a), 1.62 (1H, ddq,  $J = 14.6, 7.3, 7.3$  Hz, H24b), 1.02 (3H, d,  $J = 7.0$  Hz, Me22), 1.01 (3H, d,  $J = 7.1$  Hz, H25);  $^{13}\text{C}$  NMR (125 MHz,  $\text{CDCl}_3$ )  $\delta_{\text{C}}$  170.5, 131.6, 121.5, 83.8, 71.2, 42.8, 42.7, 39.0, 26.9, 11.3, 9.0;  $[\alpha]_{\text{D}}^{20} +5.8$  ( $c$  1.17,  $\text{CHCl}_3$ ); IR (thin film /  $\text{cm}^{-1}$ ) 3432, 2976, 2942, 1721, 1641, 1464, 1378, 1248, 1045, 1007, 920; HRMS (ESI) calc. for  $\text{C}_{11}\text{H}_{18}\text{O}_3\text{Na}$   $[\text{M}+\text{Na}]^+$  221.1148, found 221.1147.

X-ray crystallographic analysis confirmed the relative configuration of lactone **20** as shown in Figure 2.<sup>[11]</sup>

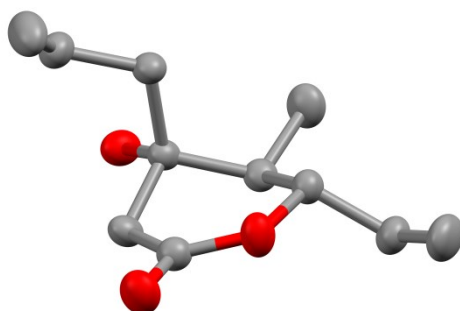

**Figure 2** ORTEP drawing of lactone **20** with thermal ellipsoids shown at 50% probability level. Hydrogen atoms are omitted for clarity.

## Lactone **6**

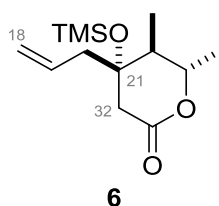

Imidazole (90.7 mg, 1.33 mmol) and  $\text{TMSCl}$  (135  $\mu\text{L}$ , 1.07 mmol) were added to a solution of alcohol **20** (176 mg, 0.888 mmol) in  $\text{CH}_2\text{Cl}_2$  (9 mL) at 0 °C. The reaction was stirred for 1 h before  $\text{NH}_4\text{Cl}$  solution was added. The layers were separated and the aqueous phase extracted with  $\text{CH}_2\text{Cl}_2$  ( $3 \times 10$  mL). The combined organic extracts

[11] CCDC-782549 containing the supplementary crystallographic data can be obtained free of charge via <http://www.ccdc.cam.ac.uk/Community/Requeststructure/> or from the Cambridge Crystallographic Data Centre, 12, Union Road, Cambridge, CB2 1EZ, UK; fax: (+44) 1223-336-033; e-mail: deposit@ccdc.cam.ac.uk.

were dried (Na<sub>2</sub>SO<sub>4</sub>), concentrated *in vacuo* and purified by flash column chromatography (EtOAc / PE 40–60 1:50 → 1:20) to give lactone **6** (233 mg, 0.862 mmol, 97%) as white needle like crystals.

Alternatively, the reaction was carried out with crude lactone **20**, imidazole (655 mg, 9.77 mmol) and TMSCl (827 μL, 6.52 mmol) in CH<sub>2</sub>Cl<sub>2</sub> (8 mL) under the same conditions. Purification provided lactone **6** as white needle like crystals (682 mg, 2.52 mmol, 77% over 3 steps).

**R<sub>f</sub>** 0.45 (EtOAc / PE 40–60 1:10); **Melting point** 33–34 °C; **<sup>1</sup>H NMR** (500 MHz, CDCl<sub>3</sub>) δ<sub>H</sub> 5.82 (1H, dddd, *J* = 17.0, 10.1, 8.4, 5.8 Hz, H19), 5.15 (1H, d, *J* = 10.1 Hz, H18a), 5.09 (1H, d, *J* = 17.2 Hz, H18b), 3.94 (1H, ddd, *J* = 10.3, 7.4, 3.1 Hz, H23), 2.88 (1H, d, *J* = 16.3 Hz, H32a), 2.43 (1H, d, *J* = 16.5 Hz, H32b), 2.38 (1H, dd, *J* = 14.0, 5.7 Hz, H20a), 2.04 (1H, dd, *J* = 14.0, 8.1 Hz, H20b), 1.91–1.80 (2H, m, H22, H24a), 1.58 (1H, ddq, *J* = 14.6, 7.3, 7.3 Hz, H24b), 1.02 (3H, t, *J* = 7.3 Hz, H25), 1.02 (3H, d, *J* = 6.8 Hz, Me22), 0.14 (9H, s, SiMe<sub>3</sub>); **<sup>13</sup>C NMR** (125 MHz, CDCl<sub>3</sub>) δ<sub>C</sub> 170.2, 133.0, 119.2, 83.9, 74.8, 43.9, 43.5, 39.9, 27.0, 11.1, 9.1, 2.5; **[α]<sub>D</sub><sup>20</sup>** +30.7 (*c* 0.7, CHCl<sub>3</sub>); **IR** (thin film / cm<sup>-1</sup>) 2962, 1742, 1251, 1077, 997, 841, 756; **HRMS** (ESI) calc. for C<sub>14</sub>H<sub>27</sub>O<sub>3</sub>Si [M+H]<sup>+</sup> 271.1724, found 271.1753.

## Diene **21**

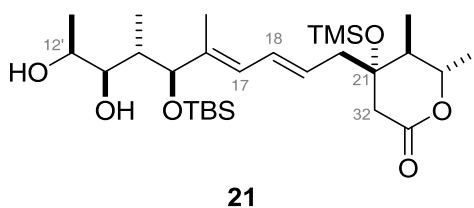

Pd(OAc)<sub>2</sub> (21.5 mg, 95.8 μmol) and Ag<sub>2</sub>CO<sub>3</sub> (264 mg, 0.958 mmol) was added to a degassed solution of vinyl iodide **5** (512 mg, 1.15 mmol) and lactone **6** (259 mg, 0.958 mmol) in DMF (2.5 mL). The mixture was heated to 80 °C for 10 h before cooled to rt, diluted with Et<sub>2</sub>O, and filtered through a plug of Celite<sup>®</sup>. The crude product was concentrated *in vacuo* and purified by column chromatography (EtOAc / PE 40–60 1:50 → 1:20) to give diene **21** as a colourless liquid (389 mg, 0.699 mmol, 73%).

**R<sub>f</sub>** 0.20 (EtOAc / PE 40–60 3:7); **<sup>1</sup>H NMR** (400 MHz, CDCl<sub>3</sub>) δ<sub>H</sub> 6.23 (1H, dd, *J* = 15.1, 10.8 Hz, H18), 5.90 (1H, d, *J* = 10.7 Hz, H17), 5.65 (1H, ddd, *J* = 15.0, 7.8, 6.9 Hz, H19), 4.25 (1H, s, OH13), 3.94 (1H, d, *J* = 8.7 Hz, H15), 3.92 (1H, ddd, *J* = 10.5, 7.4, 3.0 Hz, H23), 3.76 (1H, m, H12'), 3.64 (1H, dd, *J* = 8.0, 3.0 Hz, H13), 2.89 (1H, d, *J* = 16.4 Hz, H32a), 2.60 (1H, br s, OH12), 2.42 (1H, d, *J* = 16.2 Hz, H32b), 2.40 (1H, m obs, H20a), 2.08 (1H, dd, *J* = 14.1, 8.0 Hz, H20b), 1.80–1.89 (2H, m, H22, H24a), 1.68 (3H, s, Me16), 1.68 (1H, obs, H14), 1.56 (1H, ddq, *J* = 14.6, 7.3, 7.3 Hz, H24b), 1.15 (3H, d, *J* = 6.3 Hz, Me12'), 1.00 (3H, d, *J* = 6.8 Hz, Me23), 1.00 (3H, t, *J* = 7.3 Hz, H25), 0.89 (9H, s, Si*t*-BuMe<sub>2</sub>), 0.64 (3H, d, *J* = 6.9 Hz, Me14), 0.11 (9H, s, SiMe<sub>3</sub>), 0.10 (3H, s, Si*t*-BuMe<sub>a</sub>Me<sub>b</sub>), 0.00 (3H, s, Si*t*-BuMe<sub>a</sub>Me<sub>b</sub>); **<sup>13</sup>C NMR** (125 MHz, CDCl<sub>3</sub>) δ<sub>C</sub> 170.0, 136.6, 129.9, 128.8, 128.2, 85.7, 83.7, 78.0, 75.0, 68.5, 44.0, 43.5, 39.0, 38.6, 26.9, 25.9, 18.1, 16.3, 12.8, 11.8, 11.0, 9.0, 2.5, -4.2, -5.2; [ $\alpha$ ]<sub>D</sub><sup>20</sup> +8.9 (*c* 1.03, CHCl<sub>3</sub>); **IR** (thin film / cm<sup>-1</sup>) 3449, 2955, 2932, 2856, 1736, 1463, 1377, 1251, 1075, 1004, 840; **HRMS** (ESI) calc. for C<sub>29</sub>H<sub>57</sub>O<sub>6</sub>Si<sub>2</sub> [M+H]<sup>+</sup> 557.3688, found 557.3686.

### Aldehyde **21m**

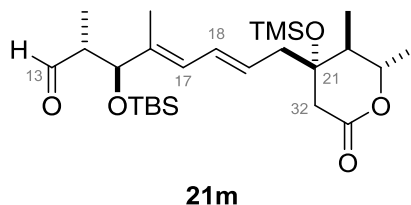

Silica-supported NaIO<sub>4</sub> (14.6 wt% NaIO<sub>4</sub>, 3.47 g, 2.37 mmol) was added to a solution of diol **21** (330 mg, 0.593 mmol) in CH<sub>2</sub>Cl<sub>2</sub> (12 mL). The mixture was filtered after 1 h and concentrated in vacuo to give aldehyde **21m** as a colourless liquid (300 mg, 0.587 mmol, crude 99%) which was used immediately without further purification.

A portion was further purified by flash column chromatography (EtOAc / PE 40–60 0:1 → 1:20) to provide a sample for characterisation:

**R<sub>f</sub>** 0.45 (EtOAc / PE 40–60 1:4); **<sup>1</sup>H NMR** (400 MHz, CDCl<sub>3</sub>) δ<sub>H</sub> 9.73 (1H, d, *J* = 2.8 Hz, H13), 6.25 (1H, dd, *J* = 15.1, 10.8 Hz, H18), 5.96 (1H, d, *J* = 10.8 Hz, H17), 5.65 (1H, ddd, *J* = 15.0, 8.1, 6.9 Hz, H19), 4.09 (1H, d, *J* = 8.4 Hz, H15), 3.91 (1H, ddd, *J* = 10.4, 7.4, 3.0 Hz, H23), 2.85 (1H, d, *J* = 16.4 Hz, H32a), 2.56 (1H, dqd, *J* = 8.2, 7.1, 2.9 Hz, H14), 2.42 (1H, d, *J* = 16.4 Hz, H32b), 2.40 (1H, m obs, H20a), 2.09 (1H, dd,



$J = 14.1, 8.1$  Hz, H20b), 1.77–1.89 (2H, m, H22, H24a), 1.69 (3H, s, Me16), 1.56 (1H, ddq,  $J = 14.6, 7.3, 7.3$  Hz, H24b), 1.00 (3H, d,  $J = 6.8$  Hz, Me23), 1.00 (3H, t,  $J = 7.3$  Hz, H25), 0.85 (3H, m obs, Me14), 0.84 (9H, s, Si-BuMe<sub>2</sub>), 0.11 (9H, s, SiMe<sub>3</sub>), 0.01 (3H, s, Si-BuMe<sub>a</sub>Me<sub>b</sub>), -0.05 (3H, s, Si-BuMe<sub>a</sub>Me<sub>b</sub>); <sup>13</sup>C NMR (125 MHz, CDCl<sub>3</sub>)  $\delta_C$  205.0, 170.0, 136.0, 130.0, 128.9, 127.6, 83.8, 80.3, 75.0, 50.4, 44.1, 43.6, 38.6, 27.0, 25.8, 18.2, 11.7, 11.07, 11.06, 9.0, 2.5, -4.4, -5.2;  $[\alpha]_D^{20} +15.3$  ( $c$  0.99, CHCl<sub>3</sub>); IR (thin film / cm<sup>-1</sup>) 2958, 2932, 2861, 1732, 1462, 1388, 1251, 1105, 1059, 840; HRMS (ESI) calc. for C<sub>27</sub>H<sub>54</sub>O<sub>5</sub>NSi<sub>2</sub> [M+NH<sub>4</sub>]<sup>+</sup> 528.3535, found 528.3531.

### Vinyl iodide **3**

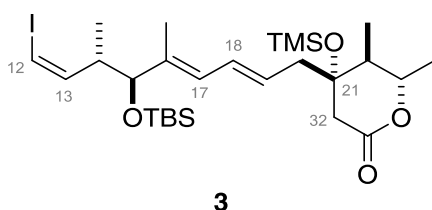

NaHMDS (1.0 M in THF, 1.79 mL, 1.79 mmol) was added to a suspension of [PPh<sub>3</sub>CH<sub>2</sub>I]<sup>+</sup>I<sup>-</sup> (948 mg, 1.79 mmol) in THF (12 mL). After stirring at rt for 30 min, the mixture was cooled to -78 °C and a solution of crude aldehyde (300 mg, 0.587 mmol) in THF (4 mL) was added to the mixture *via* cannula (2 × 4 mL THF wash). The reaction was stirred at -78 °C for 3 h before quenched with hexanes (5 mL) and NH<sub>4</sub>Cl solution (5 mL), and diluted with H<sub>2</sub>O (10 mL). The phases were separated and the aqueous phase was extracted with Et<sub>2</sub>O (3 × 50 mL). The combined organic extracts were dried (MgSO<sub>4</sub>) and concentrated *in vacuo*. Purification by flash column chromatography (EtOAc / PE 40–60 0:1 → 1:20) afforded vinyl iodide **3** (232 mg, 0.365 mmol, 62% over 2 steps) as a colourless liquid.

$R_f$  0.85 (EtOAc / PE 40–60 1:20); <sup>1</sup>H NMR (400 MHz, CDCl<sub>3</sub>)  $\delta_H$  6.26 (1H, dd,  $J = 15.1, 10.9$  Hz, H18), 6.14 (1H, d,  $J = 7.4$  Hz, H12), 6.03 (1H, dd, 8.8, 7.4 Hz, H13), 5.92 (1H, d,  $J = 10.8$  Hz, H17), 5.59 (1H, ddd,  $J = 15.0, 7.5, 7.5$  Hz, H19), 3.93 (1H, ddd,  $J = 10.4, 7.4, 3.0$  Hz, H23), 3.88 (1H, d,  $J = 5.8$  Hz, H15), 2.88 (1H, d,  $J = 16.4$  Hz, H32a), 2.71 (1H, m, H14), 2.44 (1H, d,  $J = 16.4$  Hz, H32b), 2.38 (1H, m obs, H20a), 2.11 (1H, dd,  $J = 14.1, 8.0$  Hz, H20b), 1.91–1.78 (2H, m, H22, H24a), 1.70 (3H, s, Me16), 1.57 (1H, ddq,  $J = 14.6, 7.3, 7.3$  Hz, H24b), 1.02 (3H, t,  $J = 7.3$  Hz, H25), 1.01 (3H, d,  $J = 6.8$  Hz, Me23), 0.90 (3H, d,  $J = 7.1$  Hz, Me14), 0.88 (9H, s,



## Vinyl stannane **SI1**

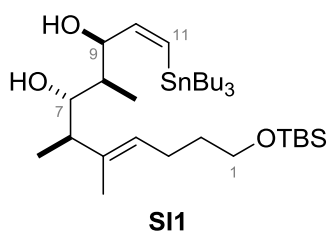

Sodium hydride (60 wt% suspension in mineral oil, 50.0 mg, 1.25 mmol) was washed with hexane ( $2 \times 1$  mL) and suspended in Et<sub>2</sub>O (1 mL). The mixture was cooled to 0 °C, a solution of vinyl iodide **14** (60.0 mg, 124 μmol) in Et<sub>2</sub>O (2 mL + 4 mL wash) was added *via* cannula and the mixture stirred at rt for 30 min before being cooled to -78 °C. Tributyltin chloride (269 μL, 992 μmol) was added followed by dropwise addition of *t*-butyllithium solution (1.7 M in pentane, 729 μL, 1.24 mmol). A further portion of *t*-butyllithium (200 μL, 340 μmol) was added after 1 h and the reaction stirred for a further 45 min before being quenched with NH<sub>4</sub>Cl solution (5 mL) and immediately warmed to rt. The layers were separated and the aqueous phase extracted with CH<sub>2</sub>Cl<sub>2</sub> ( $4 \times 5$  mL), the combined organic extracts were dried (Na<sub>2</sub>SO<sub>4</sub>) and concentrated *in vacuo*. Purification by flash column chromatography (Et<sub>3</sub>N washed silica gel, (EtOAc / PE 40–60 0:1 → 1:10) gave vinyl stannane **SI1** as a colourless oil (56.1 mg, 86.9 μmol, 70%).

**R<sub>f</sub>** 0.85 (MeOH / CH<sub>2</sub>Cl<sub>2</sub> 1:20); **<sup>1</sup>H NMR** (400 MHz, CDCl<sub>3</sub>) δ<sub>H</sub> 6.56\* (1H, dd, *J* = 13.1, 4.7 Hz, H10), 6.05\* (1H, dd, *J* = 13.1, 1.7 Hz, H11), 5.24 (1H, t, *J* = 7.0 Hz, H4), 4.35 (1H, br s, H9), 3.60 (3H, t, *J* = 6.4 Hz, H1), 3.58 (1H, m obs, H7), 3.15 (1H, br s, OH), 2.33 (1H, qd, *J* = 6.8, 4.8 Hz, H6), 2.08 (2H, m, H3), 1.85 (1H, dqd, *J* = 7.2, 7.2, 2.4 Hz, H8), 1.62 (3H, s, Me5), 1.61–1.42 (8H, m, H2, SnBu<sub>3</sub>), 1.30 (6H, m, SnBu<sub>3</sub>), 1.02 (3H, d, *J* = 6.9 Hz, Me6), 0.92–0.84 (27H, m, SnBu<sub>3</sub>, Me8, Si*t*-BuMe<sub>2</sub>), 0.05 (6H, s, Si*t*-BuMe<sub>2</sub>); **<sup>13</sup>C NMR** (100 MHz, CDCl<sub>3</sub>) δ<sub>C</sub> 147.0, 137.4, 130.5, 126.1, 75.5, 74.6, 62.6, 44.2, 39.2, 32.8, 29.3, 26.0, 24.2, 18.3, 15.6, 13.8, 12.1, 12.0, 11.4, -5.3; [**α**]<sub>D</sub><sup>20</sup> -13.6 (*c* 0.88, CHCl<sub>3</sub>); **IR** (thin film / cm<sup>-1</sup>) 3464, 2956, 2927, 2857, 1463, 1255, 1102, 970, 1102, 834, 776, 665; **HRMS** (ESI) calc. for C<sub>32</sub>H<sub>67</sub>O<sub>3</sub>Si<sup>116</sup>Sn [M+H]<sup>+</sup> 643.3871, found 643.3871.

\* These peaks show satellites due to coupling to <sup>117</sup>Sn and <sup>119</sup>Sn

## Diene **SI2**

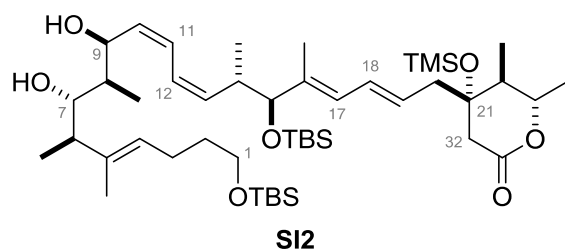

A degassed solution of vinyl stannane **SI1** (46.3 mg, 71.7  $\mu\text{mol}$ ), and vinyl iodide **3** (48.6 mg, 76.6  $\mu\text{mol}$ ) in DMF (3.2 mL) was added *via* cannula to a flask containing tetrakis(triphenylphosphine)palladium(0) (16.0 mg, 13.8  $\mu\text{mol}$ ) and  $[\text{Ph}_2\text{PO}_2][\text{NBu}_4]$  (83.0 mg, 180  $\mu\text{mol}$ ). The mixture was cooled to 0  $^\circ\text{C}$ , copper thiophenecarboxylate (36.0 mg, 188  $\mu\text{mol}$ ) was added and the reaction stirred at 0  $^\circ\text{C}$  in the dark for 30 min. Water (5 mL) and  $\text{Et}_2\text{O}$  (10 mL) were added, the layers were separated and the aqueous portion extracted with  $\text{Et}_2\text{O}$  ( $3 \times 20$  mL). The combined organic extracts were washed with water ( $2 \times 20$  mL), dried ( $\text{Na}_2\text{SO}_4$ ), concentrated *in vacuo* and purified by flash column chromatography ( $\text{EtOAc} / \text{PE}$  40–60 1:4) to give diene **SI2** as a yellowish oil (58.0 mg, 67.2  $\mu\text{mol}$ , 94%).

$R_f$  0.33 ( $\text{EtOAc} / \text{PE}$  40–60 1:4);  $^1\text{H NMR}$  (400 MHz,  $\text{CDCl}_3$ )  $\delta_{\text{H}}$  6.35 (1H, dd,  $J = 11.5, 11.5$  Hz, H11), 6.26 (1H, dd,  $J = 15.0, 10.8$  Hz, H18), 6.21 (1H, dd,  $J = 11.3, 11.3$  Hz, H12), 5.88 (1H, d,  $J = 10.7$  Hz, H17), 5.60 (1H, ddd,  $J = 15.0, 7.5, 7.5$  Hz, H19), 5.51 (1H, dd,  $J = 9.8, 9.7$  Hz, H10), 5.31 (2H, m, H13, H4), 4.89 (1H, d,  $J = 8.0$  Hz, H9), 4.93 (1H, ddd,  $J = 10.3, 7.4, 2.9$  Hz, H23), 3.68 (1H, d,  $J = 7.7$  Hz, H15), 3.61 (2H, t,  $J = 6.4$  Hz, H1), 3.57 (1H, dd,  $J = 6.3, 6.3$  Hz, H7), 3.16 (1H, br s, OH), 2.88 (1H, d,  $J = 16.4$  Hz, H32a), 2.80 (1H, dq,  $J = 9.3, 7.2$  Hz, H14), 2.44 (1H, d,  $J = 16.2$  Hz, H32b), 2.42–2.30 (2H, m, H6, H20a), 2.16–2.02 (3H, m, H3, H20b), 1.90–1.80 (3H, m, H8, H22, H24a), 1.69 (3H, s, Me16), 1.60 (3H, s, Me5), 1.62–1.52 (3H, m obs, H2, H24b), 1.07–0.99 (9H, m, H25, Me6, Me22), 0.90 (12H, s + obs,  $\text{Si}t\text{-BuMe}_2$ , Me8), 0.82 (9H, s,  $\text{Si}t\text{-BuMe}_2$ ), 0.78 (3H, d,  $J = 6.8$  Hz, Me14), 0.12 (9H, s,  $\text{SiMe}_3$ ), 0.05 (6H, s,  $\text{C10Si}t\text{-BuMe}_2$ ),  $-0.03$  (3H, s,  $\text{C15OSi}t\text{-BuMe}_a\text{Me}_b$ ),  $-0.08$  (3H, s,  $\text{C15OSi}t\text{-BuMe}_a\text{Me}_b$ );  $^{13}\text{C NMR}$  (125 MHz,  $\text{CDCl}_3$ )  $\delta_{\text{C}}$  170.1, 138.2, 137.6, 137.5, 131.5, 130.4, 127.3, 126.4, 126.2, 125.3, 123.4, 83.7, 82.8, 77.3, 77.0, 76.8, 75.3, 75.0, 70.1, 62.6, 44.9, 44.0, 43.5, 39.9, 38.6, 36.7, 32.8, 26.9, 26.0, 25.8, 24.2, 18.4, 18.2, 17.6, 15.0, 13.0, 12.1, 11.8, 11.0, 8.9, 2.4,  $-4.6, -5.0, -5.3$ ;  $[\alpha]_{\text{D}}^{20} +15.3$  ( $c$  1.17,

CHCl<sub>3</sub>); **IR** (thin film / cm<sup>-1</sup>) 3295, 2957, 2930, 1741, 1462, 1252, 1072, 1006, 971, 837, 774; **HRMS** (ESI) calc. for C<sub>48</sub>H<sub>90</sub>O<sub>7</sub>Si<sub>3</sub>Na [M+Na]<sup>+</sup> 885.5887, found 885.5882.

### Diene **22**

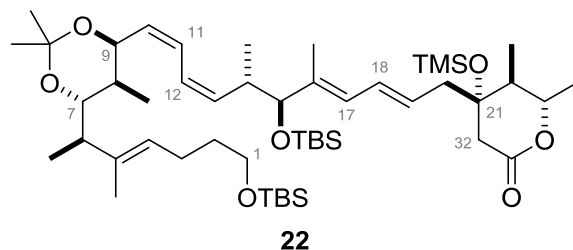

#### *via* Stille coupling of **2** and **3**

A solution of tetrakis(triphenylphosphine)palladium(0) (2.3 mg, 2.0 μmol), copper thiophenecarboxylate (7.8 mg, 41 μmol) and [Ph<sub>2</sub>PO<sub>2</sub>][NBu<sub>4</sub>] (19.0 mg, 41.3 μmol) was prepared in degassed DMF (0.3 mL) and cooled to 0 °C. A degassed solution of vinyl stannane **2** (14.0 mg, 20.4 μmol), and vinyl iodide **3** (13.0 mg, 20.4 μmol) in DMF (0.3 mL) and THF (0.2 mL) was added *via* cannula and the reaction stirred at 0 °C in the dark for 1.5 h and rt for 15 min. Water (2 mL) and Et<sub>2</sub>O (2 mL) were added, the layers were separated and the aqueous portion extracted with Et<sub>2</sub>O (3 × 5 mL). The combined organic extracts were washed with water (2 × 4 mL) dried (MgSO<sub>4</sub>), concentrated *in vacuo* and purified by flash column chromatography (EtOAc / PE 40–60 1:20) to give diene **22** as a colourless oil (14.6 mg, 16.1 μmol, 80%).

#### *via* protection of **SI2**

Diol **SI2** (32.0 mg, 37.1 μmol) was dissolved in 2,2-dimethoxypropane (1 mL) and CH<sub>2</sub>Cl<sub>2</sub> (1 mL) and pyridinium *para*-toluenesulfonate (approx. 5 mg) was added. The reaction was stirred under an argon atmosphere for 1.5 h, NaHCO<sub>3</sub> solution (2 mL) was added, the layers were separated and the aqueous phase extracted with CH<sub>2</sub>Cl<sub>2</sub> (3 × 5 mL), the combined organic extracts were dried (MgSO<sub>4</sub>) and concentrated *in vacuo* to yield diene **22** as a colourless oil (33.3 mg, 36.9 μmol, 99%) that was used without further purification.

Alternatively upon completion the reaction mixture could be concentrated *in vacuo* and submitted directly to the subsequent deprotection.

**R<sub>f</sub>** 0.85 (EtOAc / PE 40–60 1:3); **<sup>1</sup>H NMR** (500 MHz, CDCl<sub>3</sub>) δ<sub>H</sub> 6.35 (1H, dd, *J* = 11.5, 11.5 Hz, H11), 6.26 (1H, dd, *J* = 15.0, 10.9 Hz, H18), 6.19 (1H, dd, *J* = 11.3, 11.3 Hz, H12), 5.89 (1H, d, *J* = 10.7 Hz, H17), 5.60 (1H, ddd, *J* = 15.0, 7.5, 7.5 Hz, H19), 5.40–5.31 (2H, m, H10, H13), 5.23 (1H, t, *J* = 6.9 Hz, H4), 4.83 (1H, dd, *J* = 8.0, 4.6 Hz, H9), 3.93 (1H, ddd, *J* = 10.2, 7.5, 2.8 Hz, H23), 3.68 (1H, d, *J* = 7.8 Hz, H15), 3.59 (2H, t, *J* = 6.4 Hz, H1), 3.25 (1H, dd, *J* = 6.8, 6.8 Hz, H7), 2.88 (1H, d, *J* = 16.4 Hz, H32a), 2.80 (1H, dq, *J* = 9.3, 7.1 Hz, H14), 2.44 (1H, d, *J* = 16.4 Hz, H32b), 2.40 (1H, dd, *J* = 14.2, 6.5 Hz, H20a), 2.18 (1H, dq, *J* = 6.4, 6.4 Hz, H6), 2.10 (1H, dd, *J* = 14.1, 7.9 Hz, H20b), 2.07–1.97 (2H, m, H3), 1.90–1.80 (2H, m, H22, H24a), 1.79–1.73 (1H, m, H8), 1.68 (3H, s, Me16), 1.62–1.50 (3H, m obs, H2, H24b), 1.57 (3H, s, Me5), 1.36 (3H, s, acetonide), 1.34 (3H, s, acetonide), 1.04 (3H, d, *J* = 6.9 Hz, Me6), 1.02 (3H, t, *J* = 7.1 Hz, H25), 0.89 (9H, s, *Sit*-*Bu*Me<sub>2</sub>), 0.81 (9H, s, *Sit*-*Bu*Me<sub>2</sub>), 0.80 (3H, d, *J* = 6.8 Hz, Me8), 0.79 (3H, d, *J* = 6.9 Hz, Me14), 0.12 (9H, s, SiMe<sub>3</sub>), 0.04 (6H, s, C1OSit-*Bu*Me<sub>2</sub>), -0.03 (3H, s, C15OSit-*Bu*Me<sub>a</sub>Me<sub>b</sub>), -0.08 (3H, s, C15OSit-*Bu*Me<sub>a</sub>Me<sub>b</sub>); **<sup>13</sup>C NMR** (125 MHz, CDCl<sub>3</sub>) δ<sub>C</sub> 170.1, 138.3, 137.5, 137.2, 130.4, 128.5, 127.3, 126.4, 125.7, 125.3, 123.4, 100.2, 83.7, 82.8, 75.0, 66.4, 62.7, 47.2, 44.1, 43.5, 39.2, 38.6, 36.8, 32.8, 29.7, 26.9, 26.0, 25.8, 25.6, 24.0, 23.9, 18.3, 18.2, 17.6, 14.9, 13.8, 12.9, 11.8, 11.0, 8.9, 2.4, -4.6, -5.0, -5.3; [ $\alpha$ ]<sub>D</sub><sup>20</sup> +26.3 (*c* 1.37, CHCl<sub>3</sub>); **IR** (thin film / cm<sup>-1</sup>) 2929, 1745, 1462, 1278, 1252, 1104; **HRMS** (ESI) calc. for C<sub>51</sub>H<sub>98</sub>O<sub>7</sub>Si<sub>3</sub>N [M+NH<sub>4</sub>]<sup>+</sup> 920.6646, found 920.6646.

### Alcohol **22b**

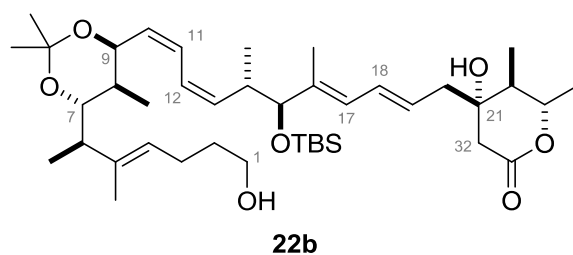

A stock solution of HF·Py and pyridine was prepared by adding HF·Py (approx. 70% HF, 100 μL) to a solution of pyridine (300 μL) in THF (1 mL) at 0 °C and the mixture stirred at rt for 30 min. TBS ether **22** (33.3 mg, 36.9 μmol) was dissolved in THF (2 mL) cooled to 0 °C and an aliquot of the stock solution (800 μL) was added. The reaction was stirred at rt for 3.5 h before cooling to 0 °C and quenched by careful addition of NaHCO<sub>3</sub> solution. The layers were separated and the aqueous portion

extracted with EtOAc (3 × 3 mL). The combined organic extracts were dried (MgSO<sub>4</sub>), concentrated *in vacuo* and the product used without further purification (26.2 mg, 36.5 μmol, 99%).

**R<sub>f</sub>** 0.40 (EtOAc / PE 40–60 1:1); **<sup>1</sup>H NMR** (500 MHz, CDCl<sub>3</sub>) δ<sub>H</sub> 6.37 (1H, dd, *J* = 15.0, 10.9 Hz, H18), 6.32 (1H, dd, *J* = 11.8, 11.8 Hz, H11), 6.18 (1H, dd, *J* = 11.3, 11.3 Hz, H12), 5.92 (1H, d, *J* = 10.7 Hz, H17), 5.62 (1H, ddd, *J* = 15.1, 7.6, 7.6 Hz, H19), 5.41–5.33 (2H, m, H10, H13), 5.26 (1H, t, *J* = 6.9 Hz, H4), 4.83 (1H, dd, *J* = 8.0, 4.8 Hz, H9), 3.95 (1H, ddd, *J* = 10.1, 7.3, 3.0 Hz, H23), 3.71 (1H, d, *J* = 7.0 Hz, H15), 3.63 (2H, t, *J* = 6.5 Hz, H1), 3.27 (1H, dd, *J* = 6.8, 6.8 Hz, H7), 2.80 (1H, d, *J* = 16.7 Hz, H32a), 2.80 (1H, m obs, H14), 2.41 (1H, d, *J* = 16.8 Hz, H32b), 2.38 (1H, dd, *J* = 13.3, 8.2 Hz, H20a), 2.23 (1H, dd, *J* = 14.2, 7.1 Hz, H20b), 2.20 (1H, dq, *J* = 6.8, 6.8 Hz, H6), 2.12–2.05 (2H, m, H3), 1.95 (1H, dq, *J* = 10.1, 6.9 Hz, H22), 1.87 (1H, dqd, *J* = 14.9, 7.3, 3.1 Hz, H24a), 1.81–1.74 (1H, m, H8), 1.70 (3H, s, Me16), 1.67–1.59 (3H, m obs, H2, H24b), 1.60 (3H, s, Me5), 1.36 (3H, s, acetonide), 1.34 (3H, s, acetonide), 1.08–1.01 (9H, m, H25, Me6, Me22), 0.84 (3H, obs, Me14), 0.83 (9H, s, *Sit*-BuMe<sub>2</sub>), 0.80 (3H, d, *J* = 7.0 Hz, Me8), –0.01 (3H, s, C15O*Sit*-BuMe<sub>a</sub>Me<sub>b</sub>), –0.08 (3H, s, C15O*Sit*-BuMe<sub>a</sub>Me<sub>b</sub>); **<sup>13</sup>C NMR** (125 MHz, CDCl<sub>3</sub>) δ<sub>C</sub> 170.2, 139.9, 137.6, 137.0, 132.5, 128.7, 125.5, 125.4, 125.1, 124.8, 123.4, 100.3, 83.6, 82.3, 76.9, 71.4, 66.4, 62.8, 47.0, 42.9, 42.5, 39.0, 38.0, 36.9, 32.6, 26.8, 25.8, 25.6, 24.2, 24.0, 18.2, 17.8, 14.8, 14.0, 12.9, 12.3, 11.2, 8.9, –4.6, –5.0; **[α]<sub>D</sub><sup>20</sup>** +32.2 (*c* 0.9, CHCl<sub>3</sub>); **IR** (thin film / cm<sup>–1</sup>) 3390, 2929, 2856, 1722, 1458, 1378, 1248, 1226, 1173, 1066, 1005, 890, 836, 775; **HRMS** (ESI) calc. for C<sub>42</sub>H<sub>72</sub>O<sub>7</sub>SiNa [M+Na]<sup>+</sup> 739.4940, found 739.4933.

### Acid **22d**

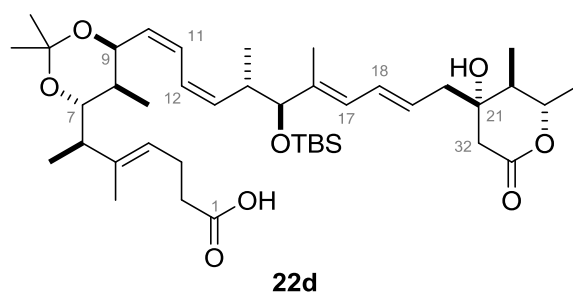

Alcohol **22b** (35.4 mg, 49.4 μmol) was dissolved in CH<sub>2</sub>Cl<sub>2</sub> (3.5 mL) and pH 7 buffer solution (0.7 mL). Bisacetoxiodobenzene (31.8 mg, 98.8 μmol) and 2,2,6,6-tetramethylpiperidine 1-oxyl (0.7 mg, 4.3 μmol) were added and the reaction stirred at

rt for 1.5 h. Sodium thiosulfate solution (3 mL) was added, the layers were separated and the aqueous portion extracted with EtOAc (5 × 3 mL). The combined organic extracts were dried (MgSO<sub>4</sub>), concentrated *in vacuo* and used directly in the next step. The crude aldehyde was dissolved in a mixture of water (1 mL), *t*-BuOH (1 mL) and THF (1 mL), 2-methyl-2-butene (100 μL), sodium chlorite (13.5 mg, 147 μmol) and sodium dihydrogenphosphate (46.9 mg, 294 μmol) were added and the reaction stirred at rt for 1 h. EtOAc (5 mL) and water (2 mL) were added, the layers were separated and the aqueous portion extracted with EtOAc (5 × 3 mL). The combined organic extracts were dried (MgSO<sub>4</sub>), concentrated *in vacuo* and purified by preparative thin layer chromatography (EtOAc / PE 40–60 / AcOH 50:50:1) to give acid **22d** as a colourless oil (28.6 mg, 39.2 μmol, 80%).

**R<sub>f</sub>** 0.55 (EtOAc / PE 40–60 / AcOH 50:50:1); **<sup>1</sup>H NMR** (500 MHz, CDCl<sub>3</sub>) δ<sub>H</sub> 6.38 (1H, dd, *J* = 15.2, 11.2 Hz, H18), 6.33 (1H, dd, *J* = 11.4, 11.4 Hz, H11), 6.18 (1H, dd, *J* = 11.3, 11.3 Hz, H12), 5.92 (1H, d, *J* = 11.0 Hz, H17), 5.62 (1H, ddd, *J* = 14.9, 7.5, 7.5 Hz, H19), 5.41–5.34 (2H, m, H10, H13), 5.23 (1H, t, *J* = 6.2 Hz, H4) 4.83 (1H, dd, *J* = 7.9, 5.0 Hz, H9), 3.95 (1H, ddd, *J* = 10.1, 7.3, 2.9 Hz, H23), 3.73 (1H, d, *J* = 6.9 Hz, H15), 3.26 (1H, dd, *J* = 6.7, 6.7 Hz, H7), 2.80 (1H, d, *J* = 16.6 Hz, H32a), 2.80 (1H, m obs, H14), 2.42 (1H, d, *J* = 16.5 Hz, H32b), 2.39–2.29 (5H, m, H2, H3, H20a), 2.24 (1H, dd, *J* = 14.1, 7.2 Hz, H20b), 2.19 (1H, dq, *J* = 6.5, 6.5 Hz, H6), 1.95 (1H, dq, *J* = 10.1, 6.8 Hz, H22), 1.87 (1H, dqd, *J* = 14.6, 7.4, 3.1 Hz, H24a), 1.78–1.72 (1H, m, H8), 1.70 (3H, s, Me16), 1.68–1.62 (1H, m obs, H24b), 1.61 (3H, s, Me5), 1.36 (3H, s, acetonide), 1.33 (3H, s, acetonide), 1.07–1.01 (9H, m, H25, Me6, Me22), 0.84 (3H, obs, Me14), 0.83 (9H, s, Sit-BuMe<sub>2</sub>), 0.79 (3H, d, *J* = 7.0 Hz, Me8), –0.01 (3H, s, C15OSit-BuMe<sub>a</sub>Me<sub>b</sub>), –0.07 (3H, s, C15OSit-BuMe<sub>a</sub>Me<sub>b</sub>); **<sup>13</sup>C NMR** (125 MHz, CDCl<sub>3</sub>) δ<sub>C</sub> 177.1, 170.5, 139.9, 138.8, 136.9, 132.5, 128.3, 125.3, 125.1, 124.7, 123.7, 123.4, 100.3, 83.6, 76.8, 82.1, 71.5, 66.4, 47.1, 42.8, 42.4, 39.0, 38.0, 36.9, 33.8, 26.8, 25.8, 25.6, 23.9, 23.2, 18.2, 17.8, 14.8, 13.8, 12.9, 12.4, 11.2, 8.9, –4.6, –5.0; **[α]<sub>D</sub><sup>20</sup>** +20.0 (*c* 0.60, CHCl<sub>3</sub>); **IR** (thin film / cm<sup>–1</sup>) 3435, 2927, 1714 br, 1459, 1378, 1248, 1225, 1064, 1006, 836, 775; **HRMS** (ESI) calc. for C<sub>42</sub>H<sub>74</sub>O<sub>8</sub>SiN [M+NH<sub>4</sub>]<sup>+</sup> 748.5178, found 748.5177.



## Acid **23**

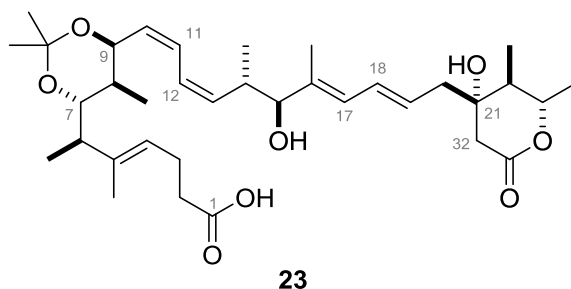

To a solution of TBS ether **22d** (10.3 mg, 14.1  $\mu\text{mol}$ ) in THF (1 mL) was added a solution of tetrabutylammonium fluoride (1 M in THF, 141  $\mu\text{L}$ , 141  $\mu\text{mol}$ ) and the reaction was heated to 50  $^{\circ}\text{C}$  for 16 h. The reaction was cooled to rt and quenched with  $\text{NH}_4\text{Cl}$  solution (1 mL), the layers were separated and the aqueous portion extracted with EtOAc ( $5 \times 3$  mL). The combined organic extracts were dried ( $\text{MgSO}_4$ ), concentrated *in vacuo* and purified by flash column chromatography (EtOAc / PE 40–60 / AcOH 50:50:1) to give seco acid **23** as a colourless oil (5.7 mg, 9.0  $\mu\text{mol}$ , 64%).

**R<sub>f</sub>** 0.55 (EtOAc / PE 40–60 / AcOH 60:40:1); **<sup>1</sup>H NMR** (500 MHz,  $\text{CDCl}_3$ )  $\delta_{\text{H}}$  6.40 (1H, dd,  $J = 15.1, 10.8$  Hz, H18), 6.34–6.25 (2H, m, H11, H12), 6.03 (1H, d,  $J = 10.8$  Hz, H17), 5.70 (1H, ddd,  $J = 15.1, 7.5, 7.5$  Hz, H19), 5.49 (1H, dd,  $J = 9.1, 9.1$  Hz, H10), 5.39 (1H, dd,  $J = 9.6, 9.6$  Hz, H13), 5.34 (1H, t,  $J = 6.2$  Hz, H4), 4.88 (1H, dd,  $J = 7.0, 4.8$  Hz, H9), 3.95 (1H, ddd,  $J = 10.1, 7.3, 3.0$  Hz, H23), 3.75 (1H, d,  $J = 9.3$  Hz, H15), 3.18 (1H, dd,  $J = 8.7, 6.8$  Hz, H7), 2.85 (1H, m, H14), 2.08 (1H, d,  $J = 16.7$  Hz, H32a), 2.41 (1H, d,  $J = 16.7$  Hz, H32b), 2.41–2.28 (4H, m, H3, H6, H20a), 2.27–2.19 (3H, m, H2, H20b), 1.95 (1H, dq,  $J = 10.1, 6.9$  Hz, H22), 1.87 (1H, dqd,  $J = 14.6, 7.3, 3.1$  Hz, H24a), 1.84–1.79 (1H, m, H8), 1.77 (3H, s, Me16), 1.69–1.59 (1H, m, H24b), 1.55 (3H, s, Me5), 1.37 (3H, s, acetonide), 1.36, (3H, s, acetonide), 1.07–1.01 (9H, m, H25, Me6, Me22), 0.85 (3H, d,  $J = 6.7$  Hz, Me14), 0.74 (3H, d,  $J = 7.8$  Hz, Me8); **<sup>13</sup>C NMR** (125 MHz,  $\text{CDCl}_3$ )  $\delta_{\text{C}}$  175.8, 170.3, 137.3, 136.7, 135.2, 131.9, 131.6, 127.7, 126.6, 125.8, 125.5, 123.1, 100.3, 83.7, 82.4, 71.6, 66.8, 65.9, 48.6, 42.8, 42.6, 39.2, 38.0, 36.0, 34.0, 26.8, 25.9, 24.1, 23.1, 17.3, 15.7, 13.1, 13.0, 11.7, 11.3, 9.0;  **$[\alpha]_{\text{D}}^{20}$**   $-83.3$  ( $c$  0.12,  $\text{CHCl}_3$ ); **IR** (thin film /  $\text{cm}^{-1}$ ) 3441, 2933, 1725, 1457, 1378, 1224, 1005; **HRMS** (ESI) calc. for  $\text{C}_{36}\text{H}_{60}\text{O}_8\text{N}$   $[\text{M}+\text{NH}_4]^+$  634.4313, found 634.4311.

It was found to be possible to reverse the order of acetonide deprotection and macrolactonisation albeit in lower yield for the deprotection step. These compounds are described below.

### Acid **SI3**

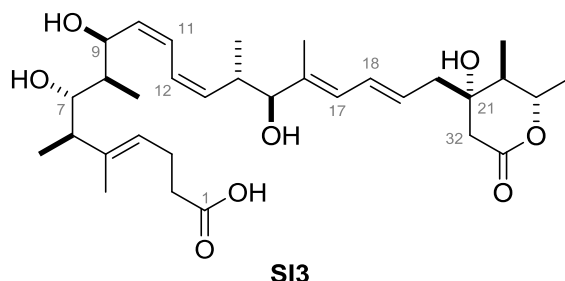

To a solution of TBS ether **22d** (12.7 mg, 17.3  $\mu\text{mol}$ ) in THF (1.2 mL) was added a solution of tetrabutylammonium fluoride (1 M in THF, 174  $\mu\text{L}$ , 174  $\mu\text{mol}$ ) and the reaction was heated to 50  $^{\circ}\text{C}$  for 16 h. The reaction was cooled to rt and quenched with  $\text{NH}_4\text{Cl}$  solution (1 mL), the layers were separated and the aqueous portion extracted with EtOAc ( $5 \times 3$  mL). The combined organic extracts were dried ( $\text{MgSO}_4$ ), concentrated *in vacuo* and redissolved in MeOH (1 mL) and cooled to 5  $^{\circ}\text{C}$ . Dowex<sup>®</sup> 50WX8 (55 mg) was added and the reaction stirred at 5  $^{\circ}\text{C}$  for 2.5 h before being filtered and concentrated *in vacuo*. Purification by preparative thin layer chromatography (EtOAc / PE 40–60 / AcOH 80:20:1) gave acid **SI3** as a colourless oil (4.2 mg, 7.1  $\mu\text{mol}$ , 41%).

$R_f$  0.37 (EtOAc / PE 40–60 / AcOH 80:20:1);  $^1\text{H NMR}$  (500 MHz,  $\text{CDCl}_3$ )  $\delta_{\text{H}}$  6.48–6.33 (3H, m, H11, H12, H18), 6.03 (1H, d,  $J = 10.7$  Hz, H17), 5.70 (1H, ddd,  $J = 15.1, 7.6, 7.6$  Hz, H19), 5.62 (1H, dd,  $J = 9.5, 9.5$  Hz, H10), 5.42 (1H, dd,  $J = 10.0, 10.0$  Hz, H13), 5.26 (1H, t,  $J = 5.9$  Hz, H4), 4.96 (1H, d,  $J = 8.6$  Hz, H9), 3.95 (1H, ddd,  $J = 10.2, 7.2, 3.0$  Hz, H23), 3.76 (1H, d,  $J = 8.9$  Hz, H15), 3.56 (1H, dd,  $J = 6.7, 5.6$  Hz, H7), 2.93–2.84 (1H, m, H14), 2.80 (1H, d,  $J = 16.7$  Hz, H32a), 2.45–2.26 (7H, m, H2, H3, H6, H20a, H32b), 2.22 (1H, dd,  $J = 14.0, 7.4$  Hz, H20b), 1.94 (1H, dq,  $J = 10.1, 6.9$  Hz, H22), 1.87 (1H, dqd,  $J = 14.6, 7.3, 3.1$  Hz, H24a), 1.82–1.78 (1H, m obs, H8), 1.77 (3H, s, Me16), 1.64 (1H, ddq,  $J = 7.2, 7.2, 7.2$  Hz, H24b), 1.58 (3H, s, Me5), 1.08 (3H, d,  $J = 6.8$  Hz, Me6), 1.05–1.01 (6H, m, H25, Me22), 1.00 (3H, d,  $J = 7.2$  Hz, Me8), 0.86 (3H, d,  $J = 6.7$  Hz, Me14);  $^{13}\text{C NMR}$  (125 MHz,  $\text{CDCl}_3$ )  $\delta_{\text{C}}$  175.8, 170.4, 138.7, 137.5, 135.8, 132.4, 132.0, 127.4, 126.4, 125.3, 124.8, 124.5, 83.7, 82.3, 76.8

obs, 71.6, 68.5, 45.6, 42.8, 42.6, 39.0, 38.0, 36.0, 33.6, 29.7, 26.8, 23.2, 17.4, 14.2, 14.1, 12.0, 11.9, 11.3, 9.0;  $[\alpha]_D^{20}$   $-10.0$  ( $c$  0.20,  $\text{CHCl}_3$ ); **IR** (thin film /  $\text{cm}^{-1}$ ) 3425, 2935, 1722, 1712, 1455, 1378, 1260, 1070, 1006, 969, 795; **HRMS** (ESI) calc. for  $\text{C}_{33}\text{H}_{56}\text{O}_8\text{N}$   $[\text{M}+\text{NH}_4]^+$  594.4000, found 594.3995.

#### Acetonide protected macrocycle **23f**

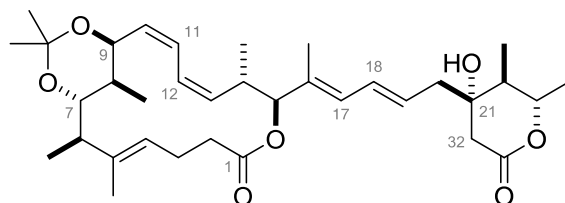

**23f**

To a solution of acid **23** (5.0 mg, 8.1  $\mu\text{mol}$ ) in THF (1.5 mL) was added triethylamine (22.6  $\mu\text{L}$ , 162  $\mu\text{mol}$ ) and 2,4,6-trichlorobenzoyl chloride (12.7  $\mu\text{L}$ , 81.1  $\mu\text{mol}$ ) and the mixture stirred for 1 h at rt. Toluene (4.5 mL) was added and the resulting solution added *via* syringe pump to a solution of DMAP (19.8 mg, 162  $\mu\text{mol}$ ) in toluene (6.0 mL) over 3 h. The reaction was stirred for a further hour before being concentrated *in vacuo* and purified by flash column chromatography (EtOAc / PE 40–60 1:2) to give macrocycle **23f** as a colourless oil (3.9 mg, 6.49  $\mu\text{mol}$ , 80%).

**R<sub>f</sub>** 0.56 (EtOAc / PE 40–60 1:1); **<sup>1</sup>H NMR** (500 MHz,  $\text{CDCl}_3$ )  $\delta_{\text{H}}$  6.35 (1H, dd,  $J$  = 15.0, 10.9 Hz, H18), 6.18 (1H, dd,  $J$  = 10.5, 10.5 Hz, H12), 6.08 (1H, dd,  $J$  = 10.6, 10.6 Hz, H11), 6.06 (1H, d,  $J$  = 10.9 Hz, H17), 5.72 (1H, ddd,  $J$  = 15.0, 7.5, 7.5 Hz, H19), 5.58 (1H, dd,  $J$  = 10.8, 7.0 Hz, H10), 5.36–5.28 (2H, m, H4, H13), 5.14 (1H, d,  $J$  = 10.3 Hz, H15), 4.91 (1H, br s, H9), 3.95 (1H, ddd,  $J$  = 10.0, 7.4, 2.8 Hz, H23), 3.17 (1H, dd,  $J$  = 10.0, 4.9 Hz, H7), 2.88–2.80 (1H, m obs, H14), 2.80 (1H, d,  $J$  = 16.8 Hz, H32a), 2.47–2.15 (8H, m, H2, H3, H6, H20a, H20b, H32b), 1.97–1.83 (2H, m, H22, H24a), 1.82–1.76 (1H, m obs, H8), 1.75 (3H, s, Me16), 1.63 (1H, ddq,  $J$  = 14.4, 7.2, 7.2 Hz, H24b), 1.49 (3H, s, Me5), 1.08 (3H, d,  $J$  = 6.7 Hz, Me6), 1.06–1.01 (6H, m, H25, Me22), 0.85 (3H, d,  $J$  = 6.8 Hz, Me14), 0.76 (3H, d,  $J$  = 6.9 Hz, Me8); **<sup>13</sup>C NMR** (125 MHz,  $\text{CDCl}_3$ )  $\delta_{\text{C}}$  172.4, 170.1, 135.1, 134.8, 134.3, 132.6, 131.7, 129.2, 127.3, 127.1, 124.2, 123.1, 100.4, 83.7, 83.0, 77.0 obs, 71.7, 66.5, 49.1, 42.8, 42.6, 38.0, 37.9, 35.4, 34.5, 26.9, 26.7, 24.9, 22.0, 16.9, 15.4, 14.1, 13.1, 12.0, 11.3, 9.0;  $[\alpha]_D^{20}$   $-50.0$  ( $c$  0.17,  $\text{CHCl}_3$ ); **IR** (thin film /  $\text{cm}^{-1}$ ); 2956, 2925, 1730, 1661, 1456,

1376, 1260, 1096, 1091, 800; **HRMS** (ESI) calc. for C<sub>36</sub>H<sub>55</sub>O<sub>7</sub> [M+H]<sup>+</sup> 599.3973, found 599.3948.

### Macrocycle **24**

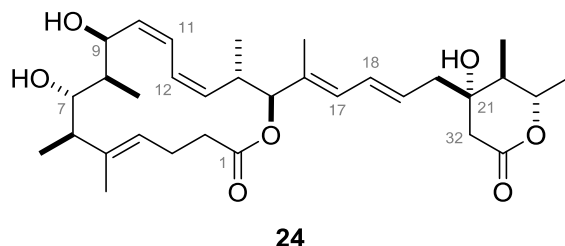

*via* deprotection of acetonide **23f**

Acetonide **23f** (3.9 mg, 6.49  $\mu$ mol) was dissolved in MeOH (1 mL) and Dowex<sup>®</sup> 50WX8 (4 mg) was added. The mixture was stirred at rt for 30 min before being filtered through glass wool and concentrated *in vacuo* to give macrocycle **24** as an amorphous solid (3.5 mg, 5.9  $\mu$ mol, 91%) that was used without further purification.

*via* macrolactonisation of acid **SI3**

To a solution of acid **SI3** (2.5 mg, 4.20  $\mu$ mol) in THF (0.5 mL) was added triethylamine (5.9  $\mu$ L, 42  $\mu$ mol) and 2,4,6-trichlorobenzoyl chloride (4.5  $\mu$ L, 28.7  $\mu$ mol) and the mixture stirred for 1 h at rt. Toluene (2 mL) was added and the resulting solution added *via* syringe pump to a solution of DMAP (11.0 mg, 42.1  $\mu$ mol) in toluene (2 mL) over 1.5 h. The reaction was stirred for a further 16 h before being concentrated *in vacuo* and purified by flash column chromatography (EtOAc / PE 40–60 1:1) to give macrocycle **24** as an amorphous solid (2.0 mg, 3.48  $\mu$ mol, 83%).

**R<sub>f</sub>** 0.42 (EtOAc / PE 40–60 1:1); **<sup>1</sup>H NMR** (500 MHz, CDCl<sub>3</sub>)  $\delta$ <sub>H</sub> 6.47 (1H, dd, *J* = 11.3, 11.3 Hz, H12), 6.36 (1H, dd, *J* = 15.2, 10.9 Hz, H18), 6.31 (1H, dd, *J* = 11.2, 11.2 Hz, H11), 6.08 (1H, d, *J* = 10.8 Hz, H17), 5.73 (1H, ddd, *J* = 15.1, 7.6, 7.6 Hz, H19), 5.61 (1H, dd, *J* = 10.3, 10.3 Hz, H10), 5.32 (1H, dd, *J* = 10.6, 10.6 Hz, H13), 5.17 (1H, dd, *J* = 10.7, 3.1 Hz, H4), 5.10 (2H, app d, *J* = 10.3 Hz, H9, H15), 3.95 (1H, ddd, *J* = 10.3, 7.4, 3.1 Hz, H23), 3.47 (1H, dd, *J* = 10.3, 4.6 Hz, H7), 2.97 (1H, ddq, *J* = 10.1, 10.1, 6.6 Hz, H14), 2.80 (1H, d, *J* = 16.7 Hz, H32a), 2.50 (1H, dq, *J* = 10.6, 6.7 Hz, H6) 2.43–2.34 (3H, m, H3a, H20a, H32b), 2.28 (1H, br t, *J* = 12.9 Hz, H2a), 2.25–2.16 (2H, m, H2b, H20b), 1.97–1.91 (2H, m, H3b, H22), 1.86 (1H, ddq, *J* = 14.6,

7.3, 3.1 Hz, H24a), 1.79 (3H, s, Me16), 1.68–1.60 (1H, m, H8), H24b), 1.58 (3H, s, Me5), 1.14 (3H, d,  $J = 6.7$  Hz, Me6), 1.13 (3H, d,  $J = 7.3$  Hz, Me8), 1.06–1.02 (6H, m, H25, Me22), 0.88 (3H, d,  $J = 6.7$  Hz, Me14);  $^{13}\text{C}$  NMR (125 MHz,  $\text{CDCl}_3$ )  $\delta_{\text{C}}$  172.2, 170.0, 136.6, 136.5, 133.8, 131.7, 131.1, 129.3, 127.4, 125.9, 125.0, 123.9, 83.6, 82.5, 80.1, 71.6, 65.0, 47.9, 42.8, 42.6, 38.0, 37.9, 34.9, 33.5, 26.8, 21.8, 16.5, 16.0, 12.1, 11.7, 11.2 (overlapping), 8.9;  $[\alpha]_{\text{D}}^{20} -44.2$  ( $c$  0.35,  $\text{CHCl}_3$ ); IR (thin film /  $\text{cm}^{-1}$ ) 3434, 2963, 2925, 2853, 1726, 1457, 1376, 1260, 1214, 1147, 1079, 1018, 969, 801, 753; HRMS (ESI) calc. for  $\text{C}_{33}\text{H}_{50}\text{O}_7\text{Na}$   $[\text{M}+\text{Na}]^+$  581.3467, found 581.3454.

### Leiodermatolide (1)

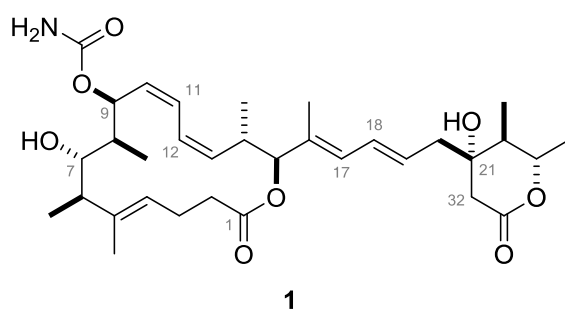

Macrocycle **24** (0.49 mg, 0.86  $\mu\text{mol}$ ), was dissolved in  $\text{CH}_2\text{Cl}_2$  (100  $\mu\text{L}$ ) and 1-trimethylsilyl imidazole (6.7  $\mu\text{L}$ , 45.4  $\mu\text{mol}$ ) was added. The reaction was stirred at rt for 2 h before judged complete by TLC. MeOH (7  $\mu\text{L}$ ) was added along with pyridinium *para*-toluenesulfonate (1 crystal) and the reaction stirred for 4 hours. The mixture was applied directly to a short column of silica washed with triethylamine and eluted with EtOAc / PE 40–60 2:3. The product was concentrated *in vacuo*, dissolved in  $\text{CH}_2\text{Cl}_2$  (300  $\mu\text{L}$ ), cooled to  $-78$   $^\circ\text{C}$  and trichloroacetylisocyanate (2  $\mu\text{L}$ , 16.8  $\mu\text{mol}$ ) was added. The reaction was stirred at  $-78$   $^\circ\text{C}$  for 30 min, quenched with MeOH (200  $\mu\text{L}$ ) and concentrated *in vacuo*. The residue was taken up in  $\text{CH}_2\text{Cl}_2$  (1 mL) and loaded onto a short column of alumina. After 1 h the column was flushed with MeOH and  $\text{CH}_2\text{Cl}_2$  (1:3, 2 mL), the solvents were removed and the residue redissolved in MeOH (250  $\mu\text{L}$ ) and  $\text{CH}_2\text{Cl}_2$  (500  $\mu\text{L}$ ). Pyridinium *para*-toluenesulfonate (2 crystals) was added and the reaction stirred for 30 min at rt before being concentrated *in vacuo* and purified by preparative thin layer chromatography (PE 40–60 / EtOAc / MeOH 60:40:5) to yield leiodermatolide (**1**) as an amorphous white solid (280  $\mu\text{g}$ , 0.45  $\mu\text{mol}$ , 53%).

via direct carbamoylation of macrocycle **24**

Macrocycle **24** (3.0 mg, 5.2  $\mu\text{mol}$ ) was dissolved in  $\text{CH}_2\text{Cl}_2$  (1 mL), cooled to  $-78\text{ }^\circ\text{C}$  and trichloroacetylisocyanate (50  $\mu\text{L}$  of a 0.105 M solution in  $\text{CH}_2\text{Cl}_2$ , 5.25  $\mu\text{mol}$ ) was added. The reaction was stirred at  $-78\text{ }^\circ\text{C}$  for 40 min, quenched with MeOH (200  $\mu\text{L}$ ) and concentrated *in vacuo*. The residue was taken up in  $\text{CH}_2\text{Cl}_2$  (1 mL) and loaded onto a short column of alumina. After 1 h the column was flushed with MeOH and  $\text{CH}_2\text{Cl}_2$  (1:3, 2 mL), the solvents were removed to give a 4:1 mixture of regioisomers. These were separated by preparative thin layer chromatography (PE 40–60 / EtOAc / MeOH 60:40:5) to yield leiodermatolide (**1**) as an amorphous white solid (300  $\mu\text{g}$ , 0.49  $\mu\text{mol}$ , 9%) along with regioisomeric carbamate **SI4** (2.1 mg, 3.4  $\mu\text{mol}$ , 66%).

$R_f$  0.32 (PE 40–60 / EtOAc / MeOH 60:40:5);  $^1\text{H NMR}$  (500 MHz,  $\text{CD}_2\text{Cl}_2$ )  $\delta_{\text{H}}$  6.54 (1H, dd,  $J = 11.4, 11.4$  Hz, H12), 6.39 (2H, m, H11, H18), 6.10 (1H, d,  $J = 10.7$  Hz, H17), 5.90 (1H, d,  $J = 10.2$  Hz, H9), 5.76 (1H, ddd,  $J = 15.0, 7.5, 7.5$  Hz, H19), 5.53 (1H, dd,  $J = 10.5, 10.5$  Hz, H10), 5.35 (1H, dd,  $J = 9.9, 9.9$  Hz, H13), 5.10 (1H, m, H4), 5.07 (1H, d,  $J = 10.4$  Hz, H15), 4.66 (2H, br s,  $\text{NH}_2$ ), 3.91 (1H, ddd,  $J = 10.0, 7.4, 2.9$  Hz, H23), 3.27 (1H, d,  $J = 10.4$  Hz, H7), 2.98 (1H, ddq,  $J = 10.1, 10.1, 6.7$  Hz, H14), 2.73 (1H, d,  $J = 16.8$  Hz, H32a), 2.47 (1H, dq,  $J = 10.1, 6.6$  Hz, H6) 2.42 (1H, dd,  $J = 14.0, 7.4$  Hz, H20a), 2.35 (1H, d,  $J = 16.5$  Hz, H32b), 2.31 (1H, ddd,  $J = 16.7, 6.3, 2.5$  Hz, H2a), 2.23 (1H, m, H20b), 2.21 (2H, m, H3a, H3b), 2.00 (1H, m, H2b), 1.90 (1H, dq,  $J = 10.1, 7.0$  Hz, H22), 1.86 (1H, ddq,  $J = 14.6, 7.4, 3.3$  Hz, H24a), 1.80 (3H, d,  $J = 0.9$  Hz, Me16), 1.74 (1H, br q,  $J = 7.6$  Hz, H8), 1.63 (1H, ddq,  $J = 14.6, 7.3, 7.3$  Hz, H24b), 1.43 (3H, s, Me5), 1.13 (3H, d,  $J = 6.7$  Hz, Me6), 1.09 (3H, d,  $J = 7.3$  Hz, Me8), 1.02 (3H, d,  $J = 6.9$  Hz, Me22), 1.02 (3H, t,  $J = 7.3$  Hz, H25), 0.87 (3H, d,  $J = 6.7$  Hz, Me14);  $^{13}\text{C NMR}$  (125 MHz,  $\text{CD}_2\text{Cl}_2$ )  $\delta_{\text{C}}$  172.2, 170.1, 157.3, 137.7, 137.5, 134.1, 131.7, 129.7, 128.6, 128.2, 126.2, 125.7, 124.5, 83.9, 82.6, 78.2, 72.2, 67.8, 48.6, 43.2, 43.0, 39.4, 38.7, 35.1, 33.8, 27.2, 22.3, 16.6, 16.5, 12.5, 12.1, 11.7, 11.3, 9.2;  $[\alpha]_{\text{D}}^{20}$   $-74.0$  ( $c$  0.027, MeOH); HRMS (ESI) calc. for  $\text{C}_{34}\text{H}_{52}\text{NO}_8$   $[\text{M}+\text{H}]^+$  602.3693, found 602.3713.

Carbamate **SI4**

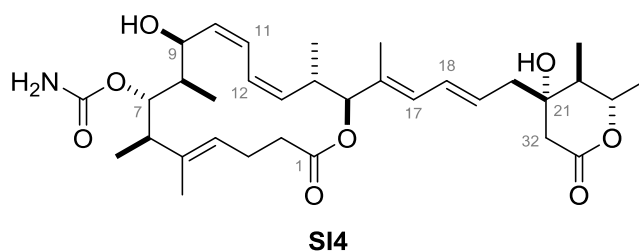

**R<sub>f</sub>** 0.29 (PE 40–60 / EtOAc / MeOH 60:40:5); **<sup>1</sup>H NMR** (500 MHz, CDCl<sub>3</sub>) δ<sub>H</sub> 6.47 (1H, dd, *J* = 11.3, 11.3 Hz, H12), 6.37 (1H, dd, *J* = 14.9, 10.9 Hz, H18), 6.33 (1H, dd, *J* = 11.2, 11.2 Hz, H11), 6.09 (1H, d, *J* = 10.9 Hz, H17), 5.73 (1H, ddd, *J* = 15.2, 7.6, 7.6 Hz, H19), 5.58 (1H, dd, *J* = 10.3, 10.3 Hz, H10), 5.34 (1H, dd, *J* = 10.6, 10.6 Hz, H13), 5.17 (1H, dd, *J* = 10.6, 3.7 Hz, H4), 5.10 (1H, d, *J* = 10.1 Hz, H15), 5.08 (1H, m, H9), 4.85 (1H, d, *J* = 10.3 Hz, H7), 4.66 (2H, br s, NH<sub>2</sub>), 3.95 (1H, ddd, *J* = 10.1, 7.3, 3.0 Hz, H23), 2.98 (1H, ddq, *J* = 10.2, 10.2, 6.6 Hz, H14), 2.80 (1H, d, *J* = 16.7 Hz, H32a), 2.62 (1H, m, H6), 2.44–2.34 (3H, m, H3a, H20a, H32b), 2.30 (1H, br t, *J* = 13.1 Hz, H2a), 2.26–2.17 (2H, m, H3b, H20b), 2.03–1.91 (2H, m, H2b, H22), 1.88 (1H, ddq, *J* = 14.6, 7.3, 3.1 Hz, H24a), 1.80 (3H, d, *J* = 0.9 Hz, Me16), 1.76 (1H, br q, *J* = 7.5 Hz, H8), 1.65 (1H, ddq, *J* = 14.6, 7.3, 7.3 Hz, H24b), 1.50 (3H, s, Me5), 1.07–1.02 (12H, m, Me6, Me8, Me22, H25), 0.88 (3H, d, *J* = 6.7 Hz, Me14); **<sup>13</sup>C NMR** (125 MHz, CDCl<sub>3</sub>) δ<sub>C</sub> 172.2, 170.0, 156.5, 136.6, 135.9, 133.9, 131.7, 131.1, 129.3, 127.3, 126.5, 124.8, 123.9, 83.6, 82.4, 81.7, 71.2, 64.4, 46.1, 42.8, 42.6, 38.5, 37.9, 26.8, 21.9, 16.6, 15.6, 12.0, 11.31, 11.25, 11.24, 8.9; [**α**]<sub>D</sub><sup>20</sup> –62.5 (*c* 0.80, MeOH); **IR** (thin film / cm<sup>-1</sup>) 3378, 2928, 1730, 1375, 1332, 1212, 1149, 1057, 750; **HRMS** (ESI) calc. for C<sub>34</sub>H<sub>55</sub>N<sub>2</sub>O<sub>8</sub> [M+NH<sub>4</sub>]<sup>+</sup> 619.3953, found 619.3950.

### III. Comparison of NMR data for natural and synthetic leiodermatolide

| atom            | $\delta_C$ (125.75 MHz, CD <sub>2</sub> Cl <sub>2</sub> ) |           | $\delta_H$ (500.05 MHz, CD <sub>2</sub> Cl <sub>2</sub> ) |      |                 |           |      |                 |
|-----------------|-----------------------------------------------------------|-----------|-----------------------------------------------------------|------|-----------------|-----------|------|-----------------|
|                 | natural                                                   | synthetic | natural                                                   | mult | $J$ (Hz)        | synthetic | mult | $J$ (Hz)        |
| 1               | 172.2                                                     | 172.2     |                                                           |      |                 |           |      |                 |
| 2a              | 33.8                                                      | 33.8      | 2.31                                                      | ddd  | 16.5, 6.4, 2.4  | 2.31      | ddd  | 16.7, 6.3, 2.5  |
| 2b              |                                                           |           | 2.00                                                      | ddd  | 16.5, 11.0, 3.1 | 2.00      | m    | n.d.            |
| 3a              | 22.3                                                      | 22.3      | 2.21                                                      | m    | n.d.            | 2.21      | m    | n.d.            |
| 3b              |                                                           |           | 2.21                                                      | m    | n.d.            | 2.21      | m    | n.d.            |
| 4               | 125.7                                                     | 125.7     | 5.10                                                      | dd   | 8.5, 5.5        | 5.10      | m    | n.d.            |
| 5               | 137.3                                                     | 137.5     |                                                           |      |                 |           |      |                 |
| 6               | 48.6                                                      | 48.6      | 2.46                                                      | dq   | 10.5, 6.6       | 2.47      | dq   | 10.1, 6.6       |
| 7               | 78.2                                                      | 78.2      | 3.26                                                      | br d | 9.7             | 3.27      | br d | 10.4            |
| 8               | 39.4                                                      | 39.4      | 1.74                                                      | br q | 7.2             | 1.74      | br q | 7.6             |
| 9               | 67.7                                                      | 67.8      | 5.90                                                      | d    | 10.2            | 5.90      | d    | 10.2            |
| 10              | 128.6                                                     | 128.6     | 5.53                                                      | dd   | 10.3, 10.3      | 5.53      | dd   | 10.5, 10.5      |
| 11              | 126.2                                                     | 126.2     | 6.38                                                      | dd   | 11.5, 11.5      | 6.38      | dd   | 11.2, 11.2      |
| 12              | 124.5                                                     | 124.5     | 6.54                                                      | dd   | 11.4, 11.4      | 6.54      | dd   | 11.4, 11.4      |
| 13              | 137.7                                                     | 137.7     | 5.36                                                      | dd   | 10.4, 10.4      | 5.35      | dd   | 9.9, 9.9        |
| 14              | 35.1                                                      | 35.1      | 2.98                                                      | ddq  | 10.2, 10.2, 6.6 | 2.98      | ddq  | 10.1, 10.1, 6.7 |
| 15              | 82.6                                                      | 82.6      | 5.07                                                      | d    | 10.4            | 5.07      | d    | 10.4            |
| 16              | 134.0                                                     | 134.1     |                                                           |      |                 |           |      |                 |
| 17              | 129.7                                                     | 129.7     | 6.10                                                      | d    | 10.9            | 6.10      | d    | 10.7            |
| 18              | 131.7                                                     | 131.7     | 6.40                                                      | dd   | 14.8, 10.9      | 6.40      | dd   | 15.1, 10.7      |
| 19              | 128.2                                                     | 128.2     | 5.76                                                      | ddd  | 15.1, 7.6, 7.6  | 5.76      | ddd  | 15.0, 7.5, 7.5  |
| 20a             | 38.7                                                      | 38.7      | 2.42                                                      | dd   | 14.0, 7.4       | 2.42      | dd   | 14.0, 7.4       |
| 20b             |                                                           |           | 2.23                                                      | m    | n.d.            | 2.23      | m    | n.d.            |
| 21              | 72.2                                                      | 72.2      |                                                           |      |                 |           |      |                 |
| 22              | 43.2                                                      | 43.2      | 1.89                                                      | dq   | 9.9, 6.8        | 1.90      | dd   | 10.1, 7.0       |
| 23              | 83.9                                                      | 83.9      | 3.91                                                      | ddd  | 10.1, 7.4, 2.9  | 3.91      | ddd  | 10.0, 7.4, 2.9  |
| 24a             | 27.2                                                      | 27.2      | 1.84                                                      | ddq  | 14.8, 7.4, 3.2  | 1.86      | ddq  | 14.6, 7.4, 3.3  |
| 24b             |                                                           |           | 1.63                                                      | ddq  | 14.6, 7.3, 7.3  | 1.63      | ddq  | 14.6, 7.3, 7.3  |
| 25              | 9.2                                                       | 9.2       | 1.02                                                      | t    | 7.3             | 1.02      | t    | 7.3             |
| Me5             | 11.3                                                      | 11.3      | 1.43                                                      | s    |                 | 1.43      | s    |                 |
| Me6             | 16.5                                                      | 16.5      | 1.13                                                      | d    | 6.7             | 1.13      | d    | 6.7             |
| Me8             | 12.5                                                      | 12.5      | 1.09                                                      | d    | 7.4             | 1.09      | d    | 7.3             |
| Me14            | 16.6                                                      | 16.6      | 0.87                                                      | d    | 6.7             | 0.87      | d    | 6.7             |
| Me16            | 12.1                                                      | 12.1      | 1.80                                                      | d    | 0.8             | 1.80      | d    | 0.9             |
| Me22            | 11.6                                                      | 11.7      | 1.02                                                      | d    | 6.9             | 1.02      | d    | 6.9             |
| 32a             | 42.9                                                      | 43.0      | 2.73                                                      | d    | 16.5            | 2.73      | d    | 16.8            |
| 32b             |                                                           |           | 2.35                                                      | d    | 16.3            | 2.35      | d    | 16.5            |
| 33              | 170.1                                                     | 170.1     |                                                           |      |                 |           |      |                 |
| 34              | 157.3                                                     | 157.3     |                                                           |      |                 |           |      |                 |
| NH <sub>2</sub> |                                                           |           | 4.65                                                      | br s |                 | 4.66      | br s |                 |

The published data for leiodermatolide was recorded at 600 MHz (<sup>1</sup>H) and 150 MHz (<sup>13</sup>C). We are in possession of an authentic sample of leiodermatolide and so were able to do a direct comparison at 500 / 125 MHz. We thank Dr Amy Wright for the kind donation of an authentic sample.



#### IV. $^1\text{H}$ and $^{13}\text{C}$ NMR spectra

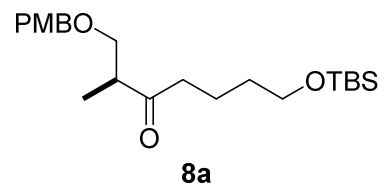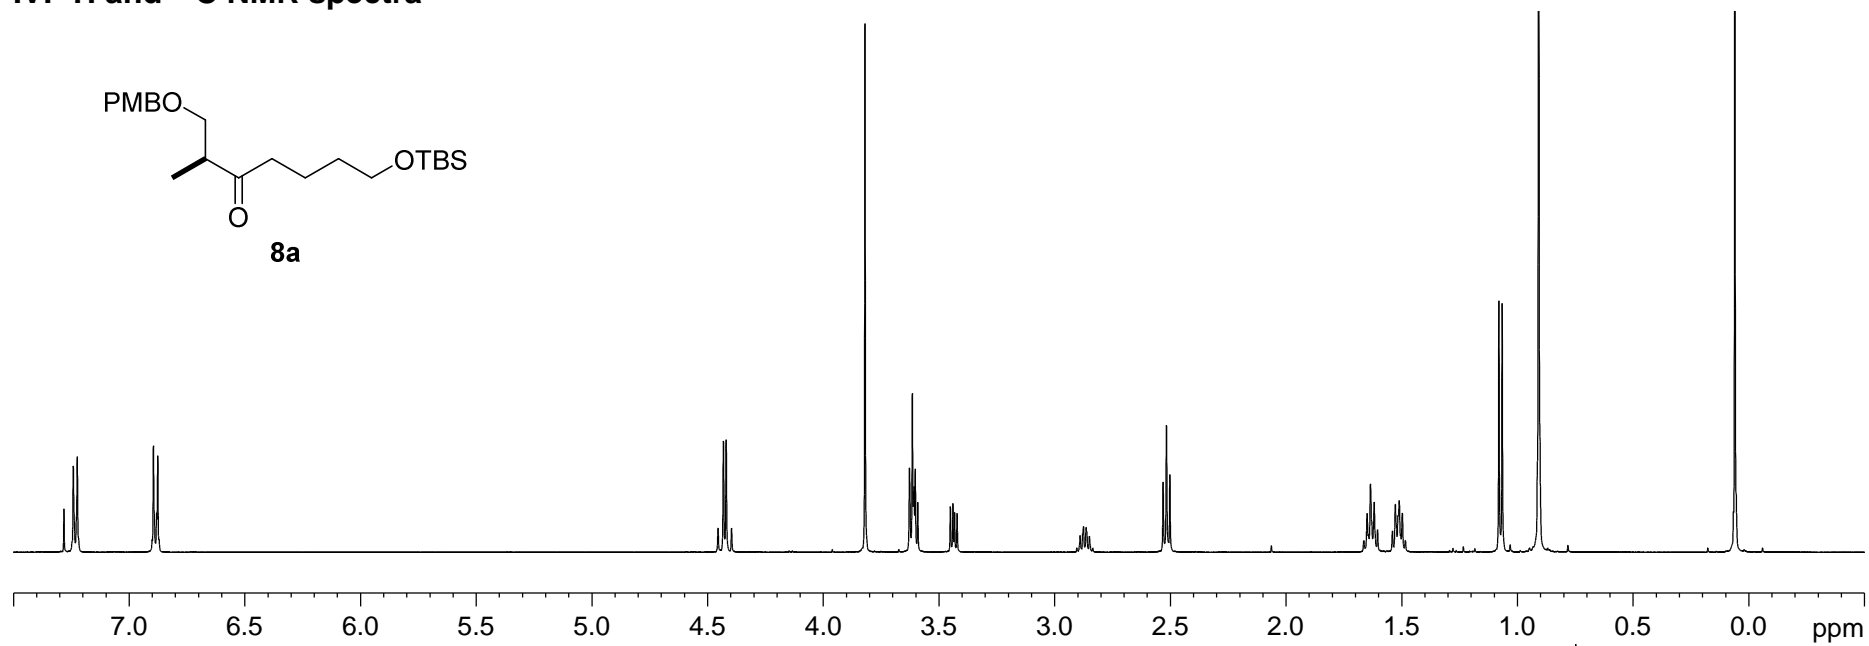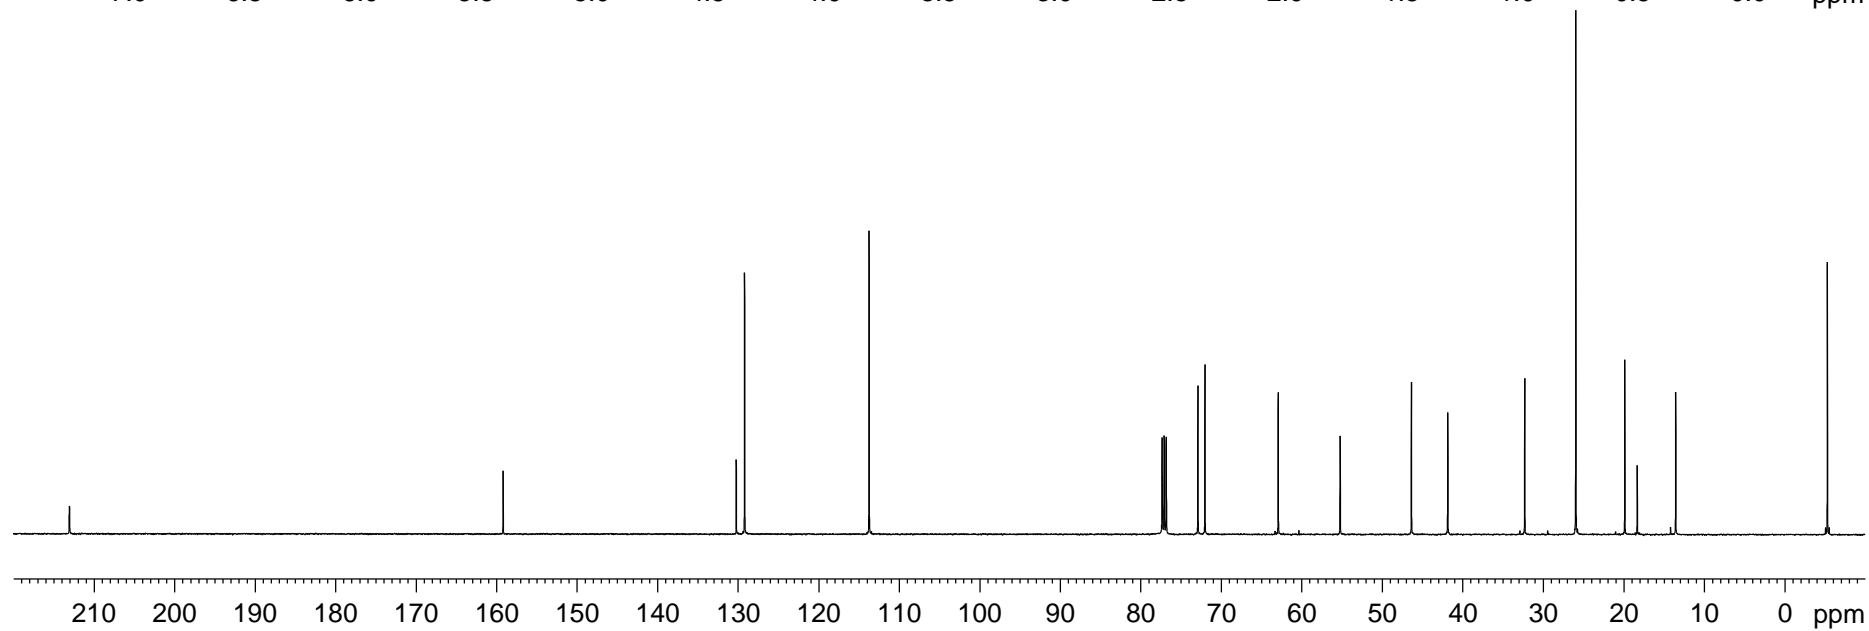

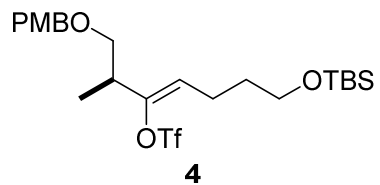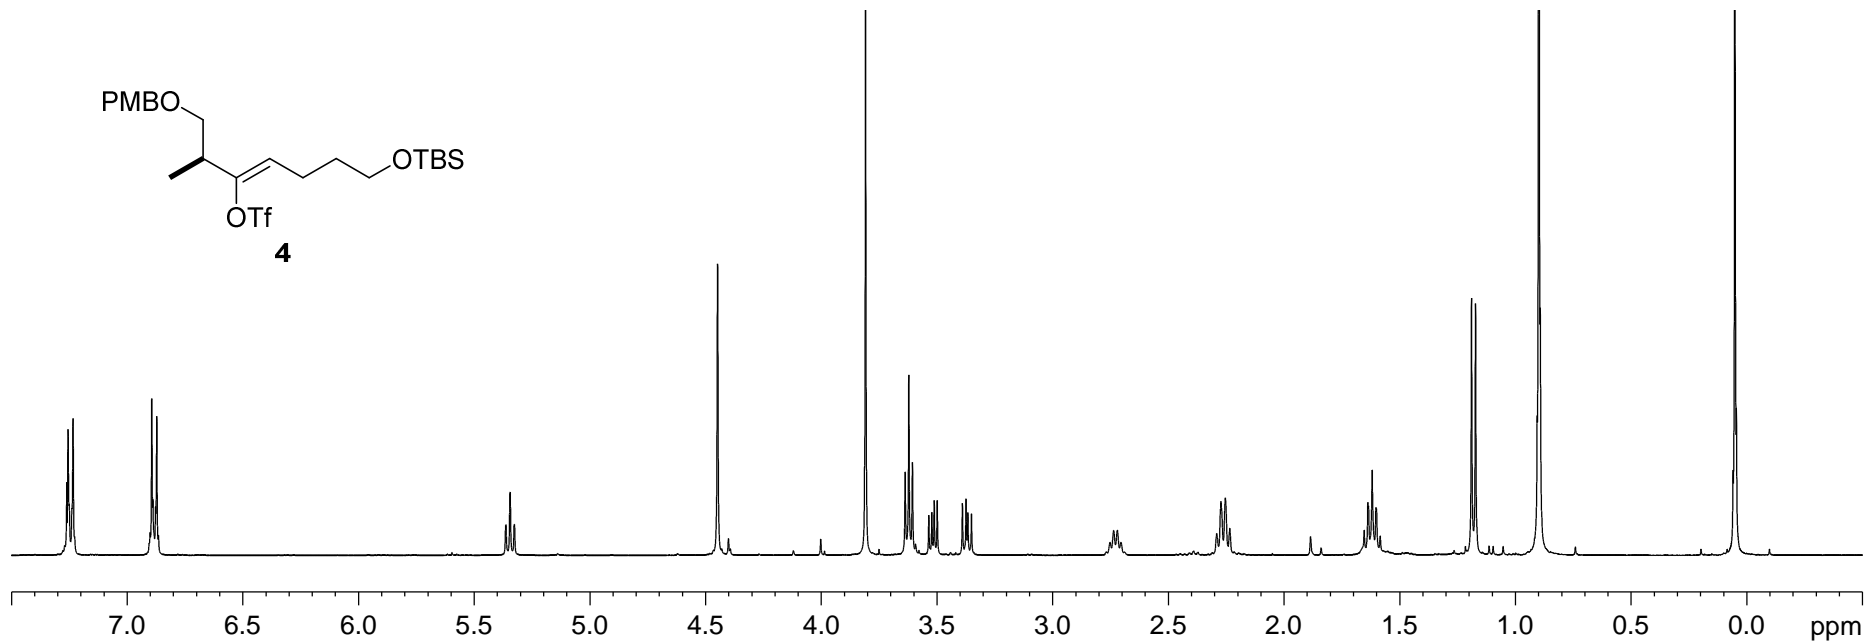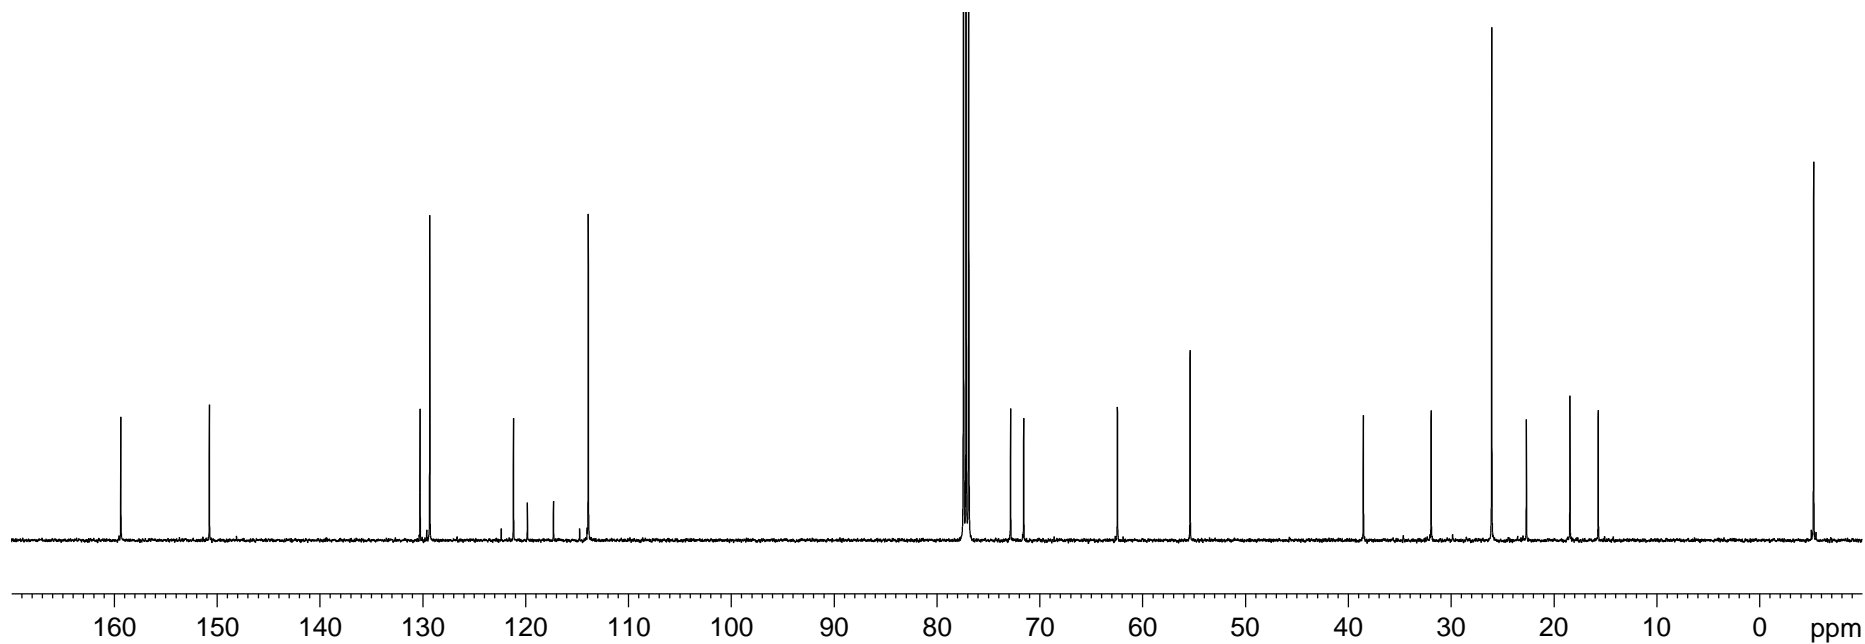

SI-41

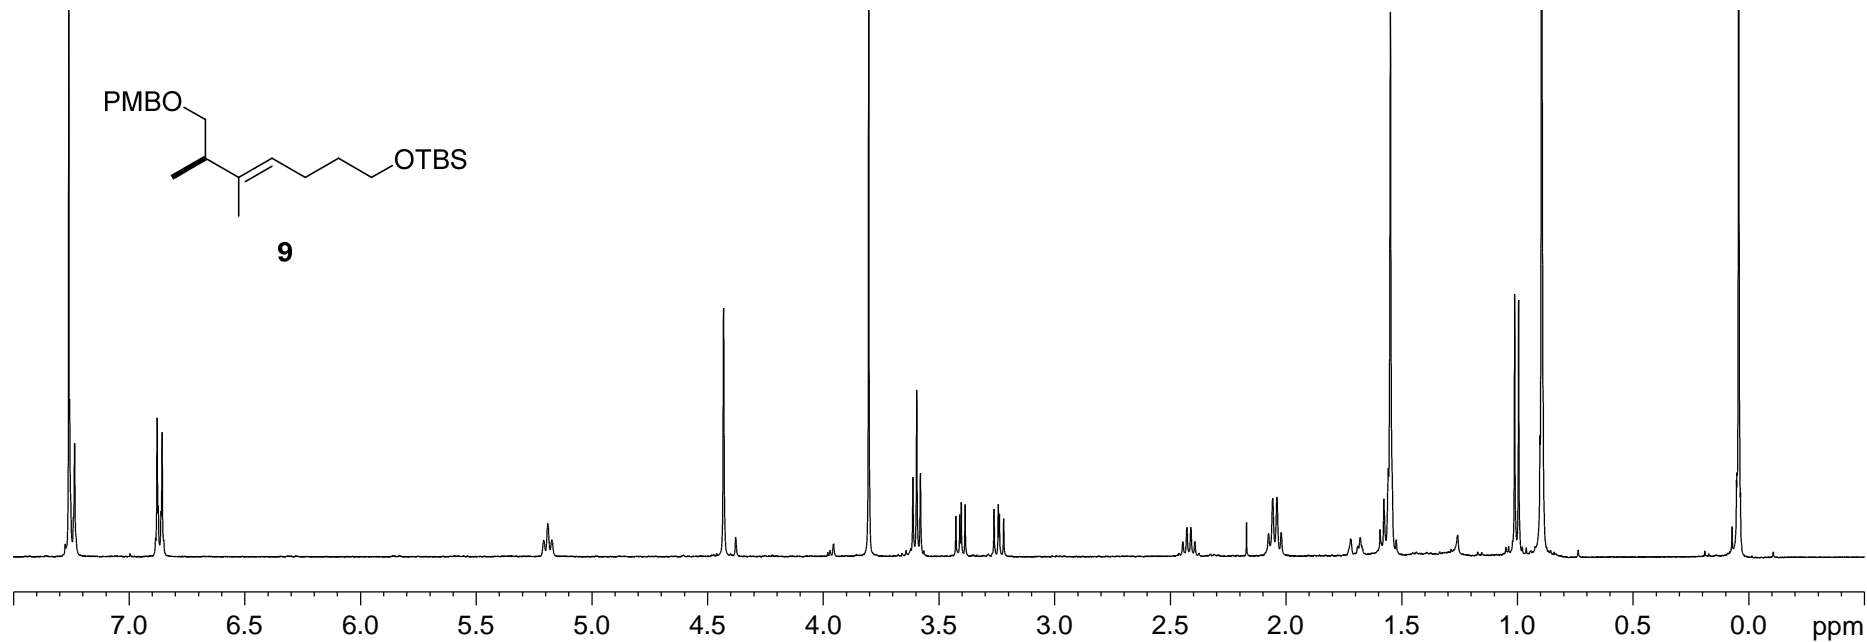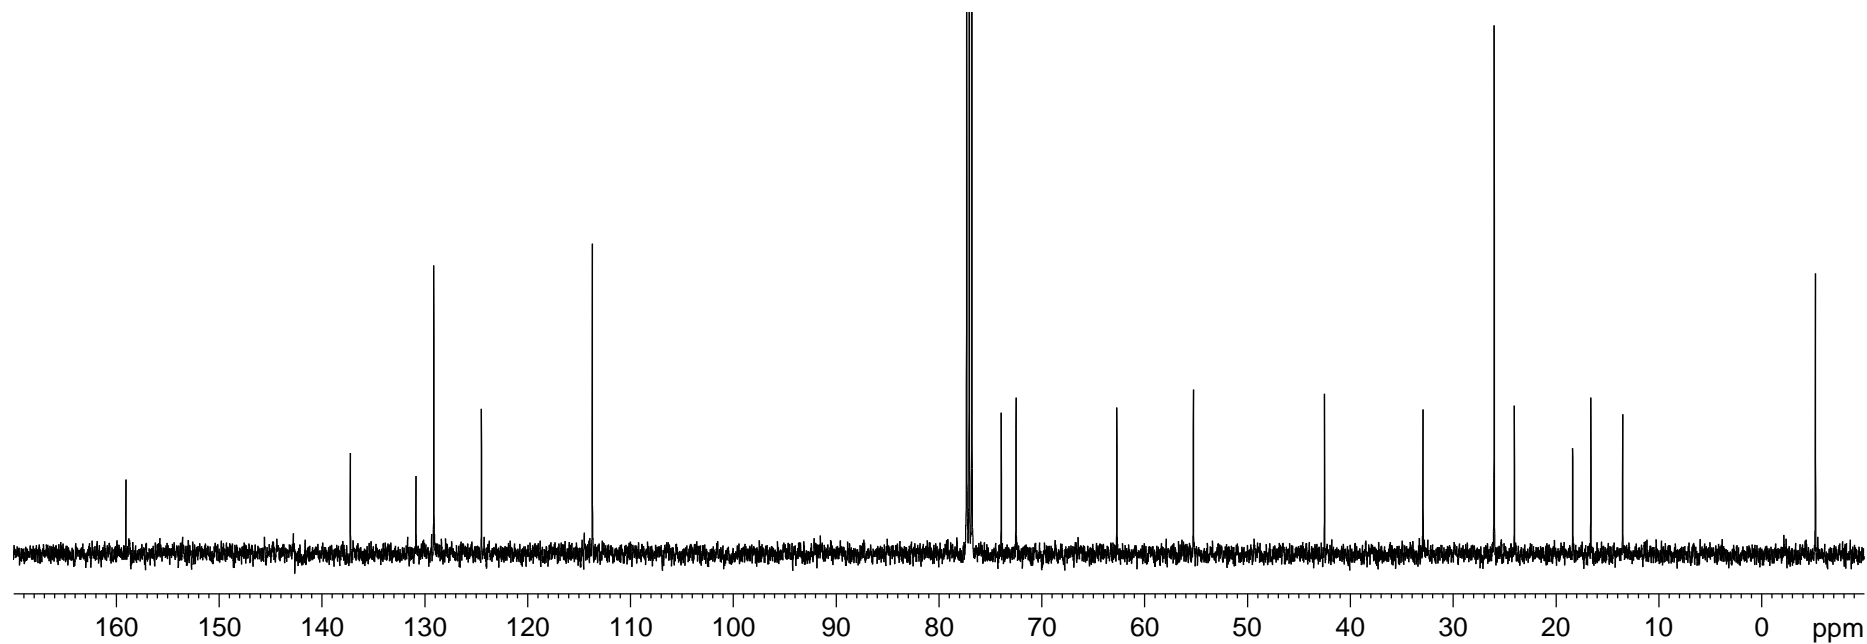

SI-42

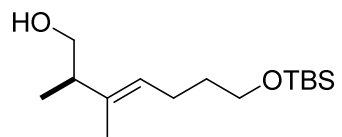

9d

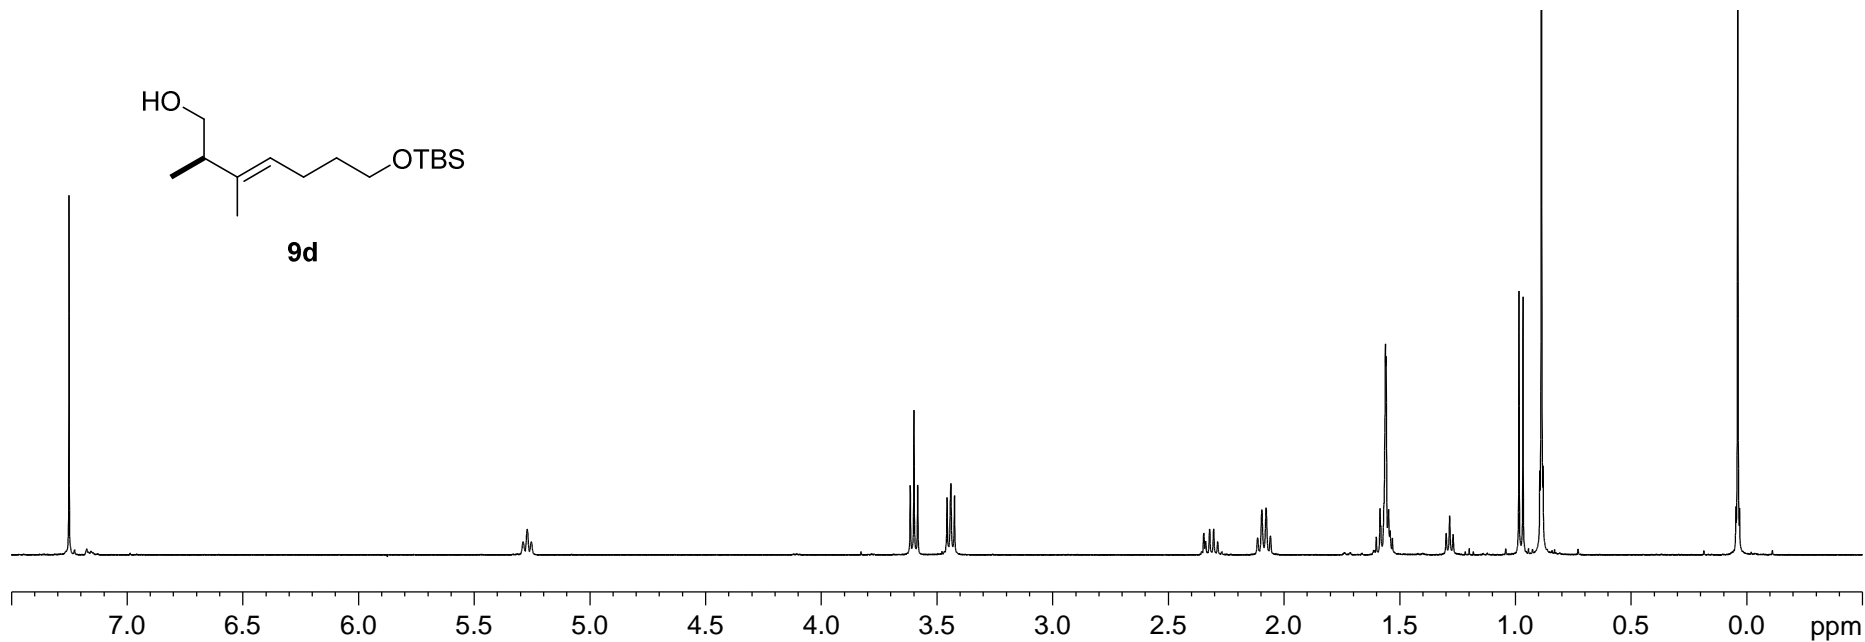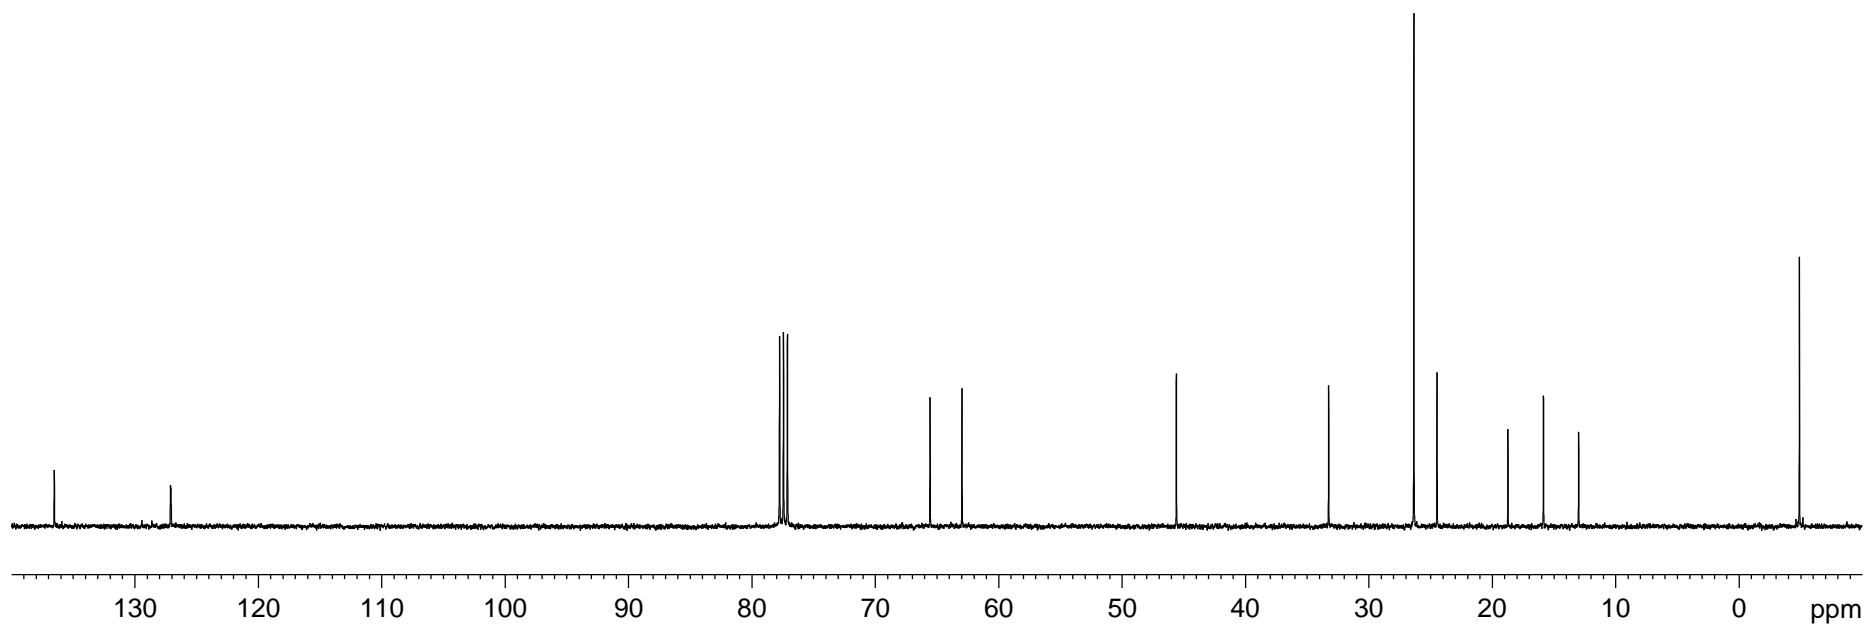

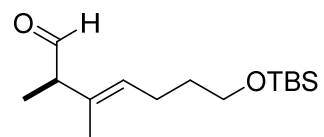

10

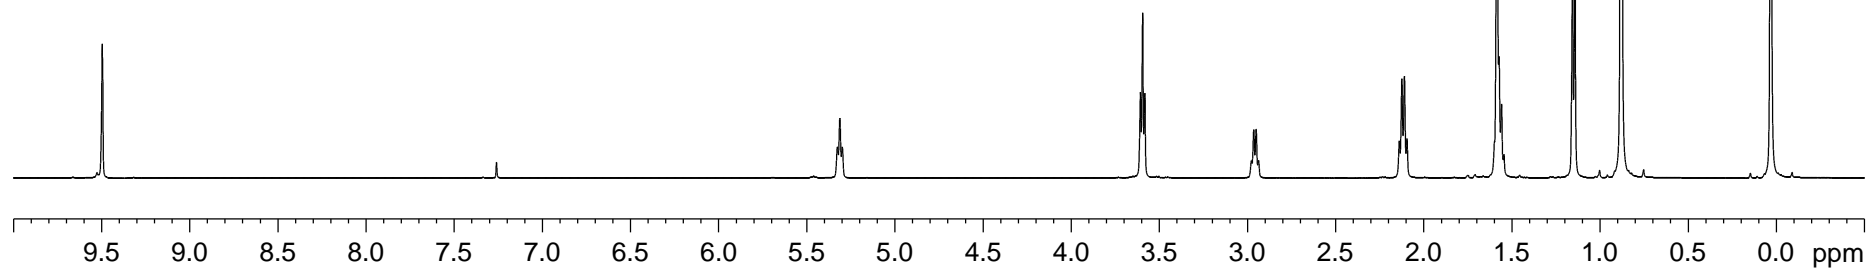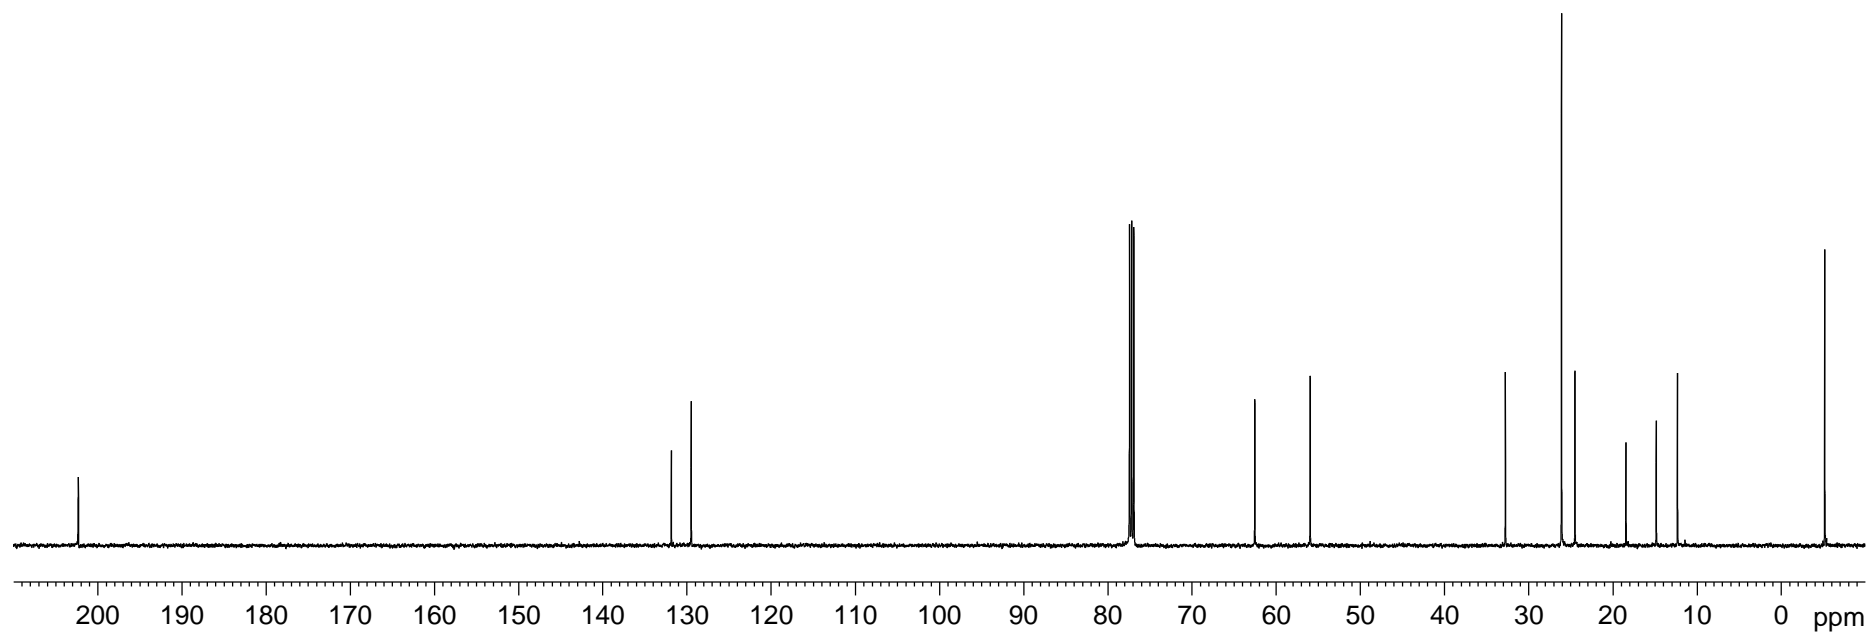

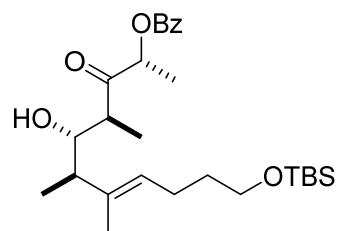

11

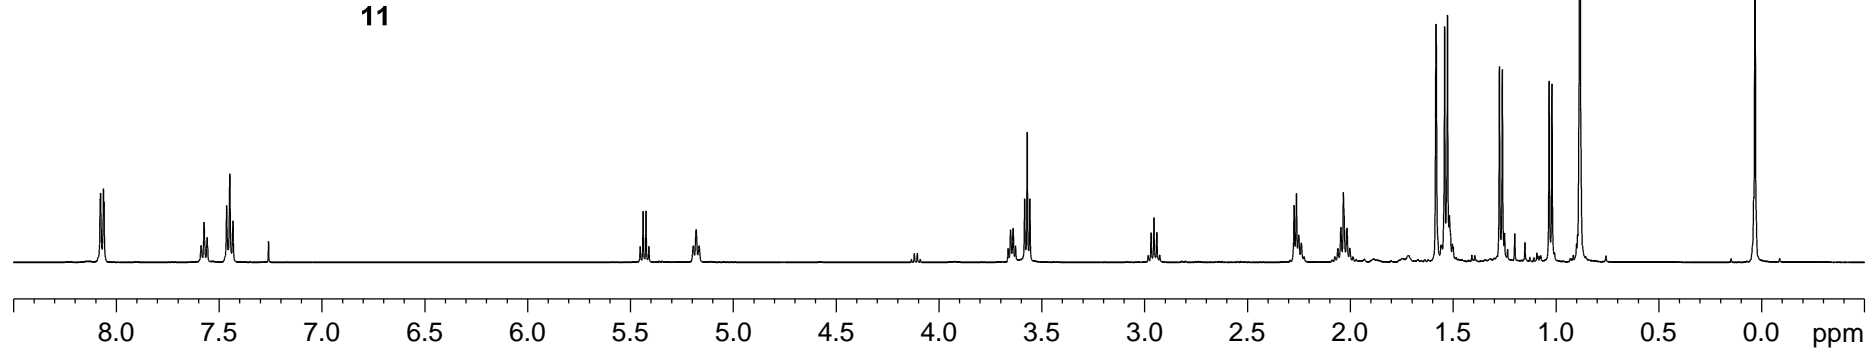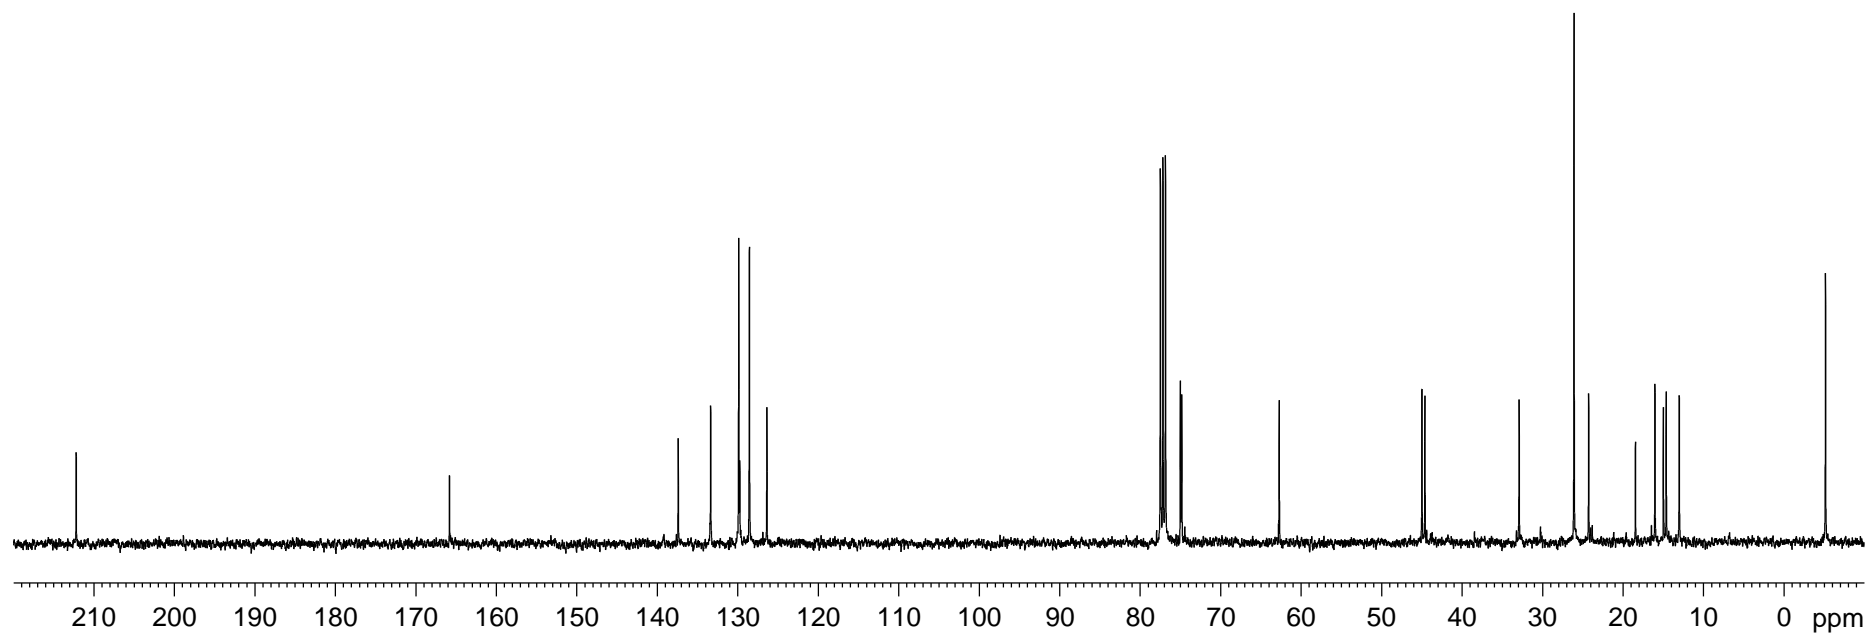

SI-45

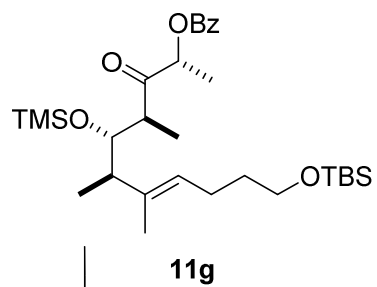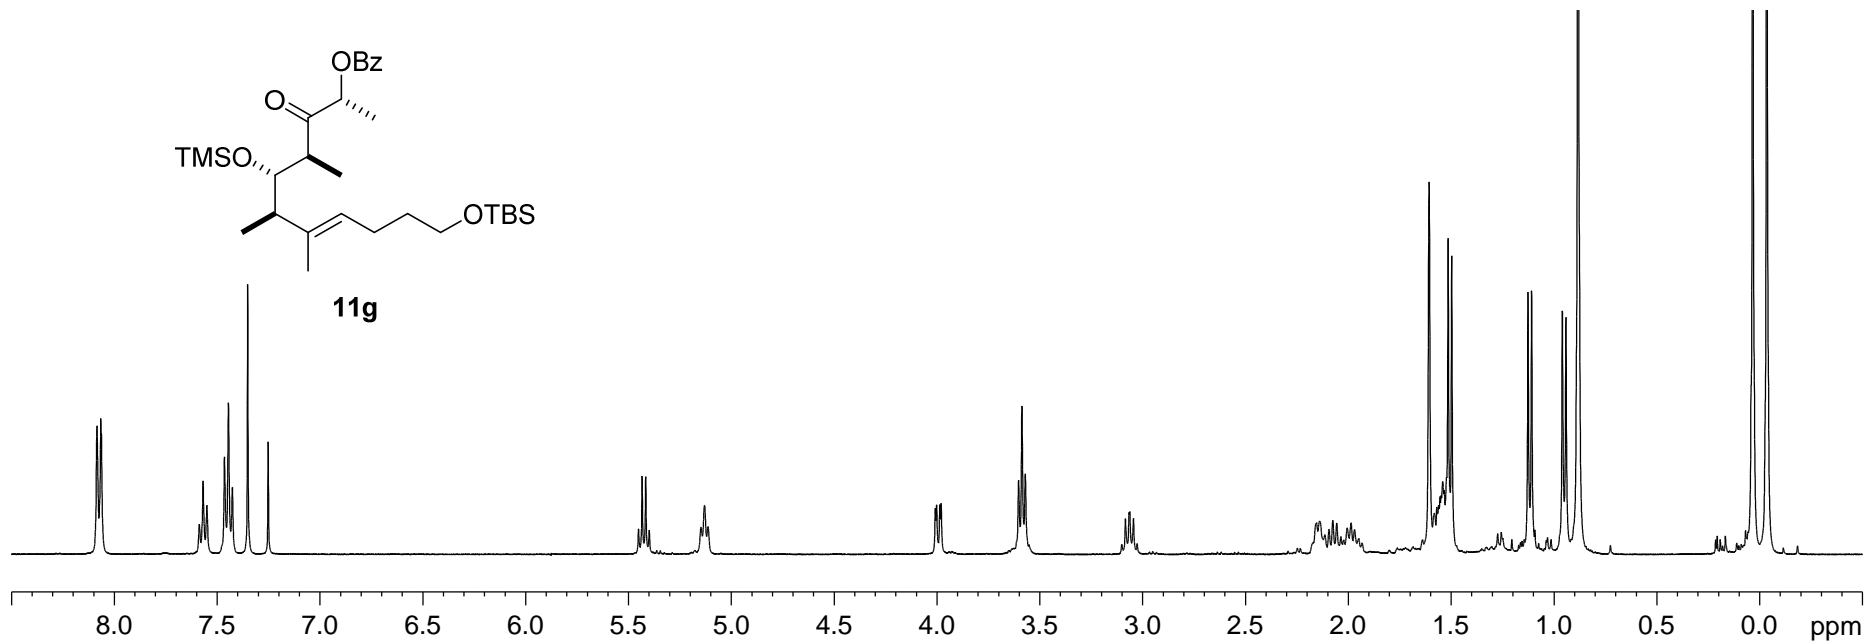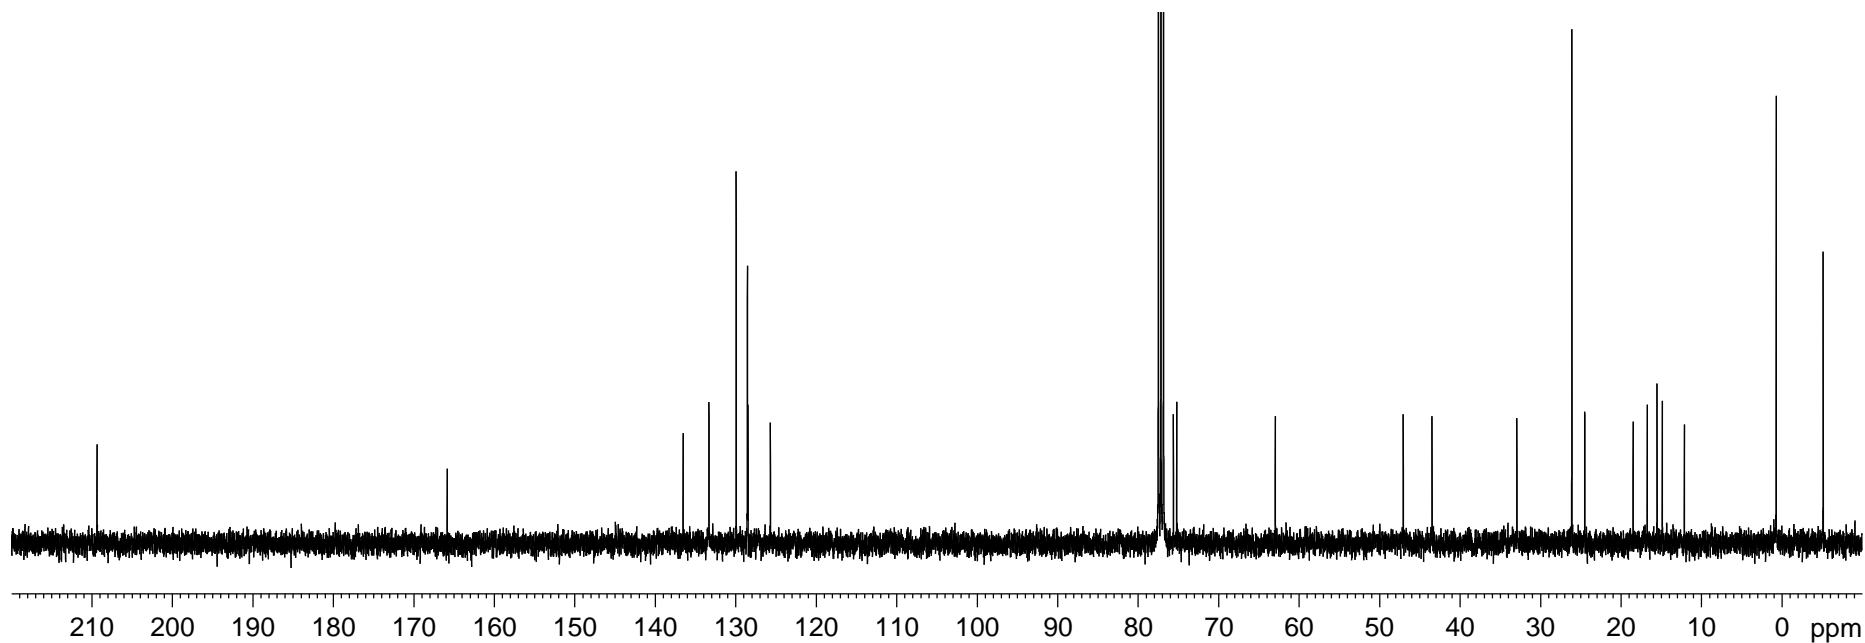





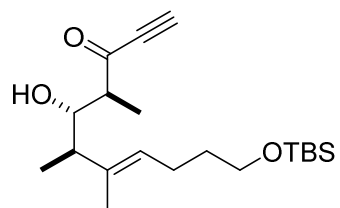

12

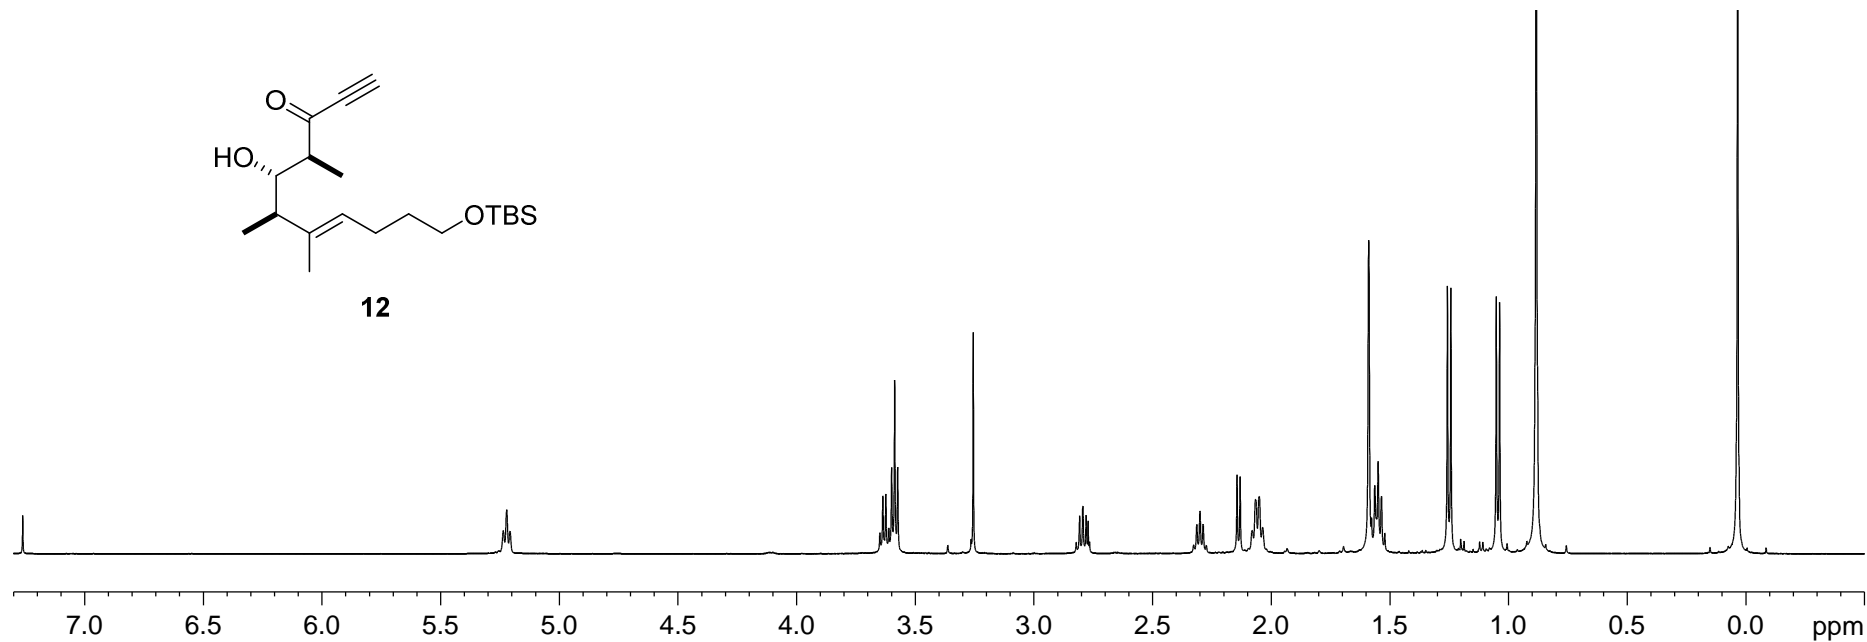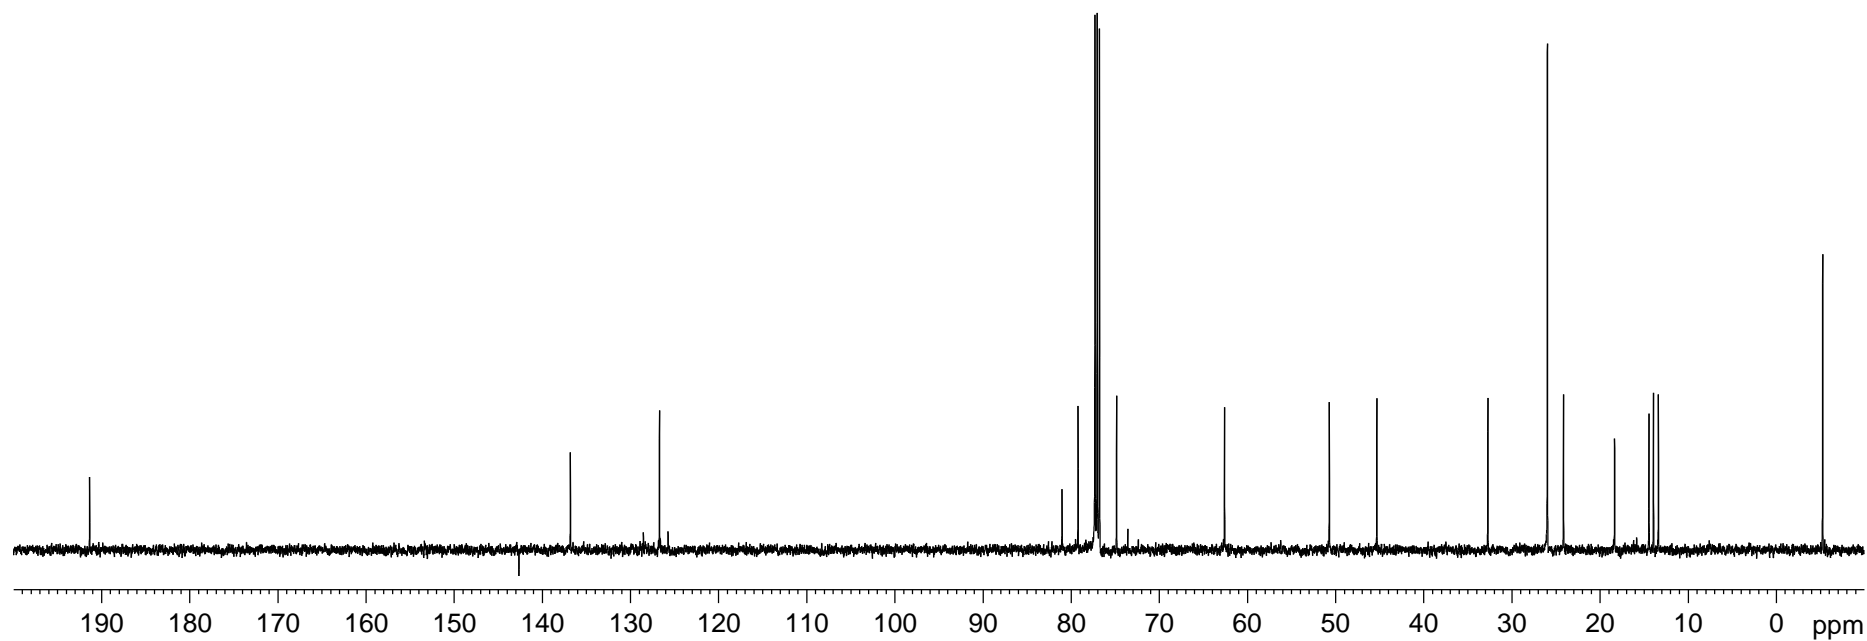

SI-48

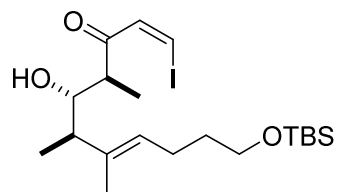

13

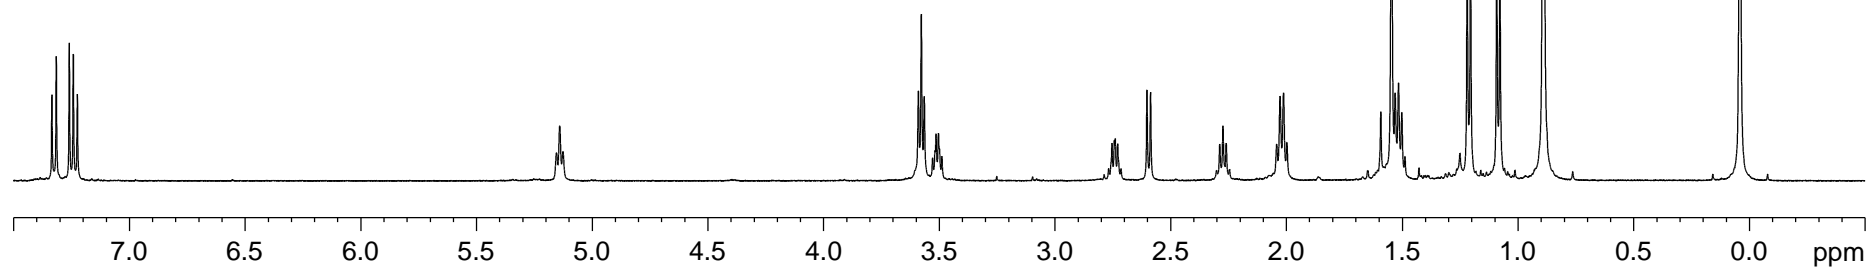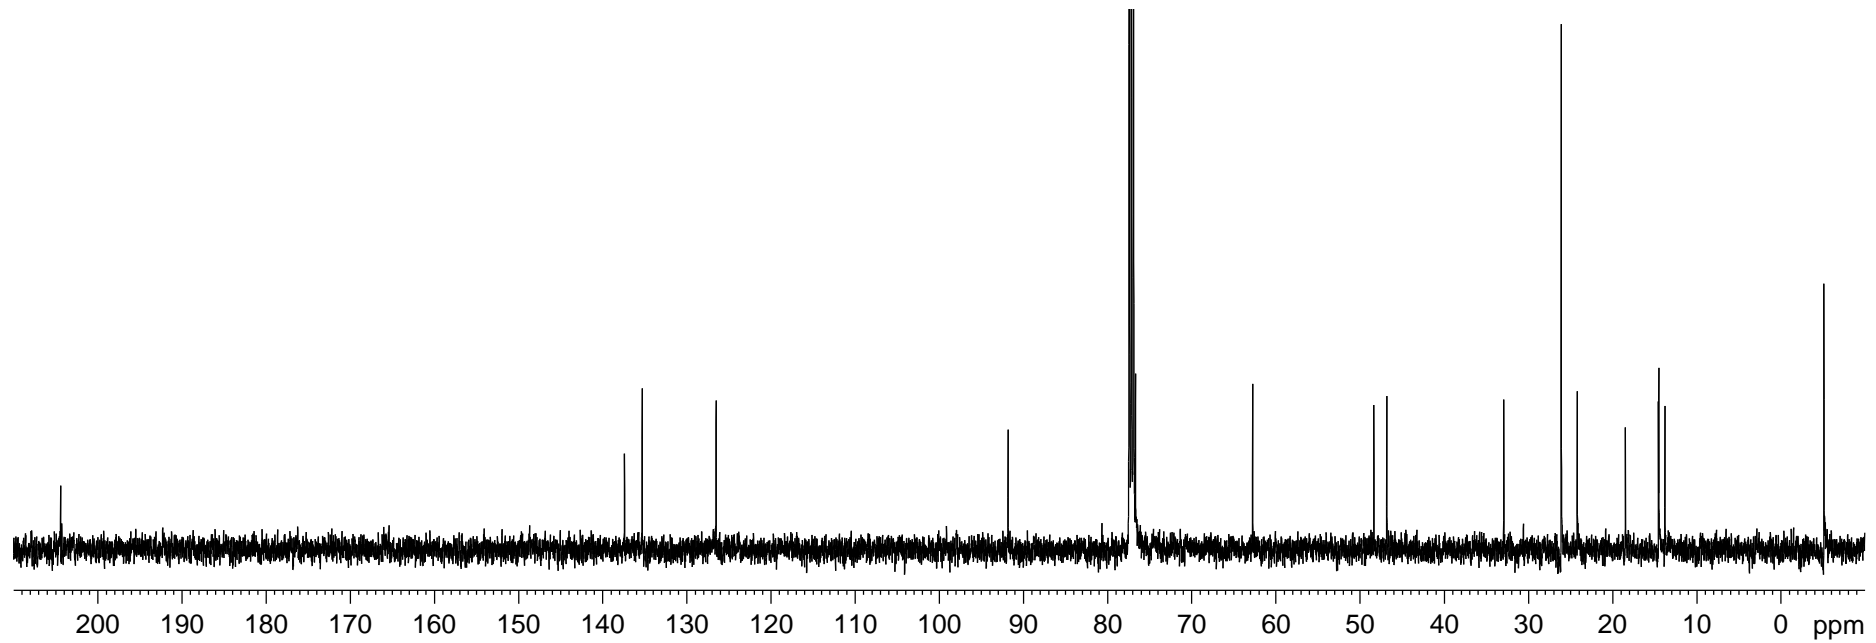

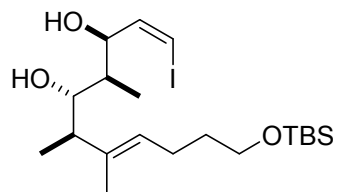

14

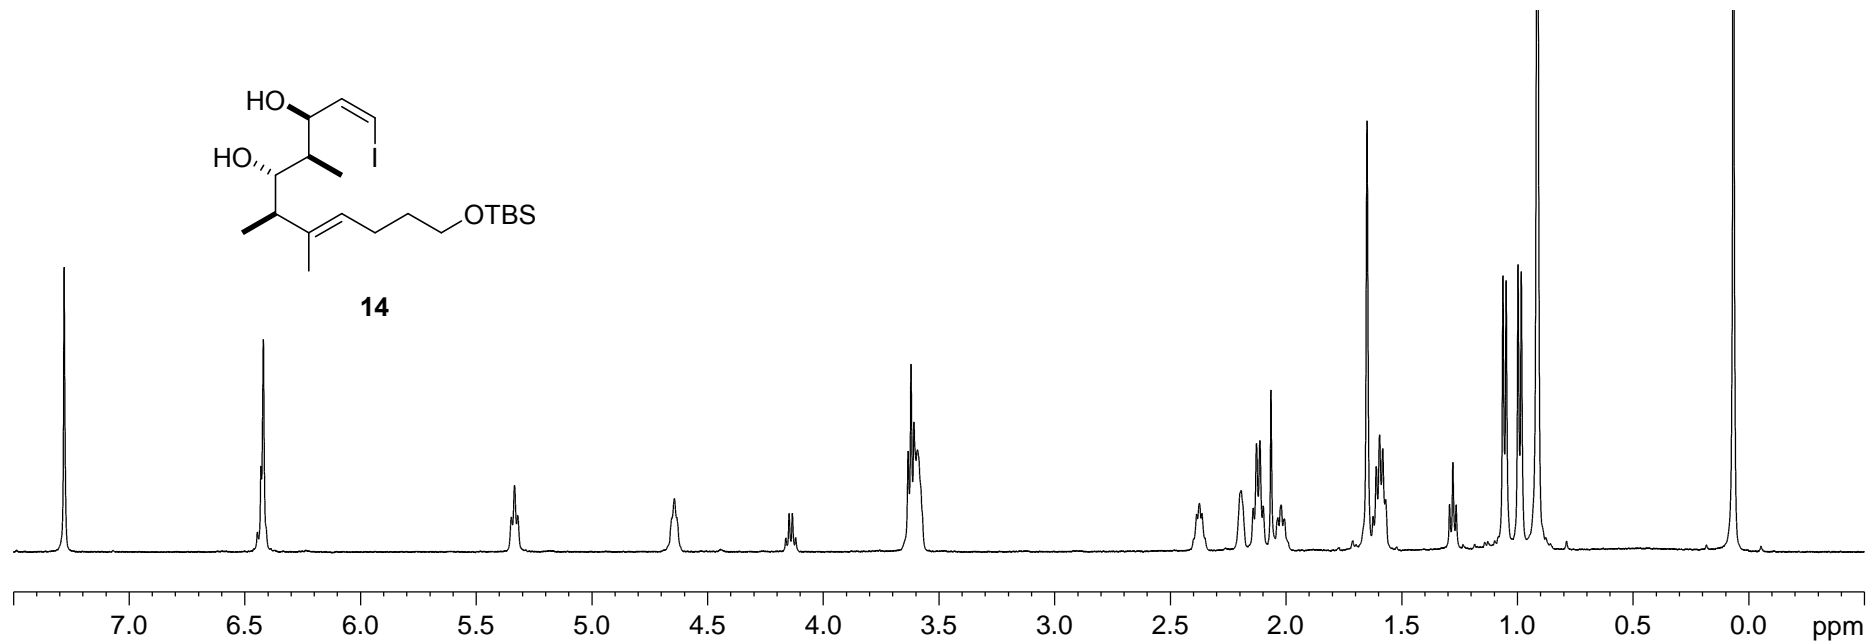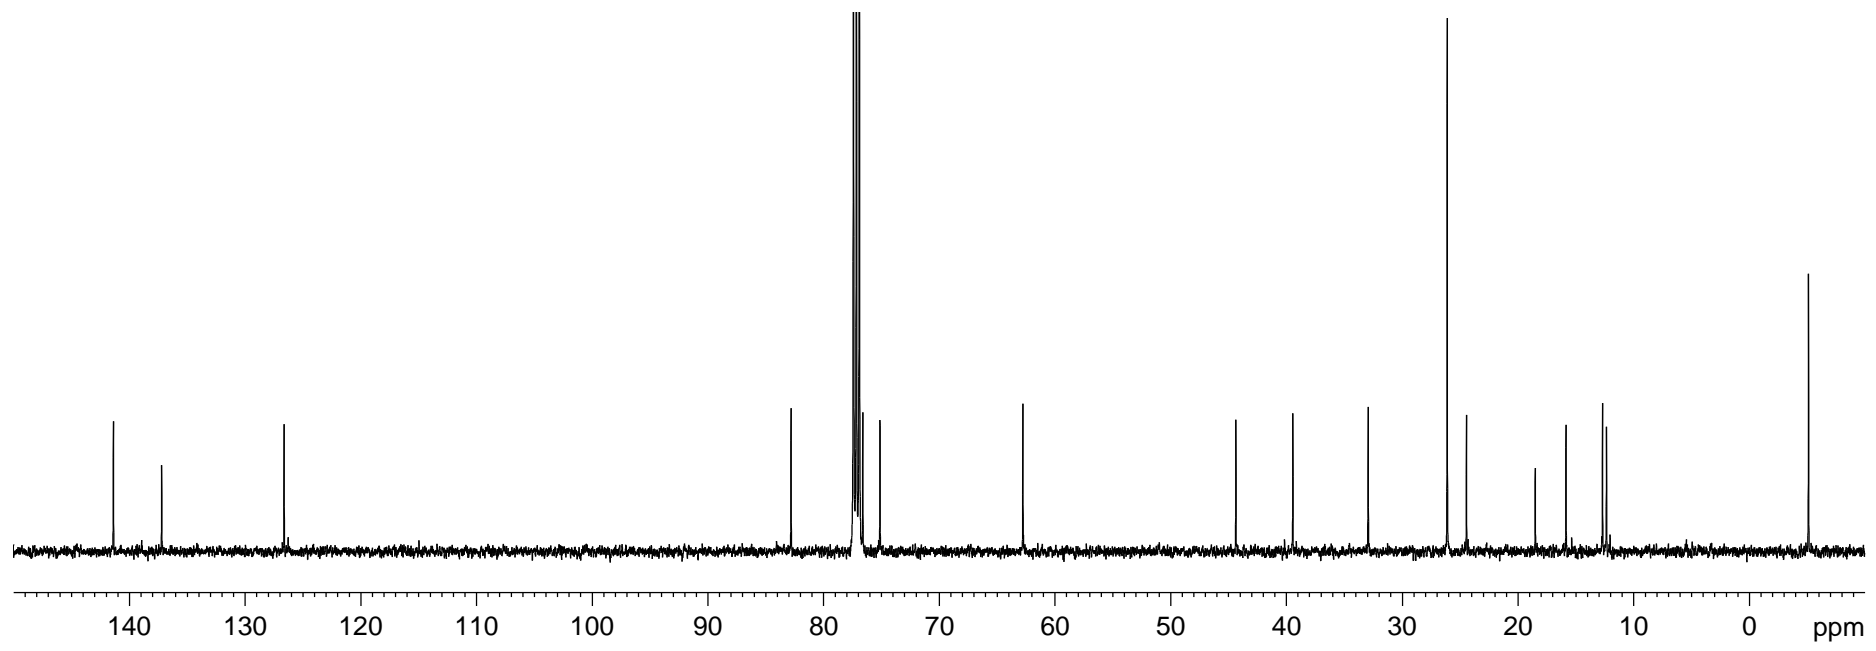

SI-50

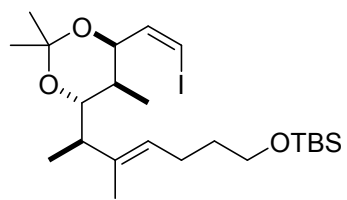

14m

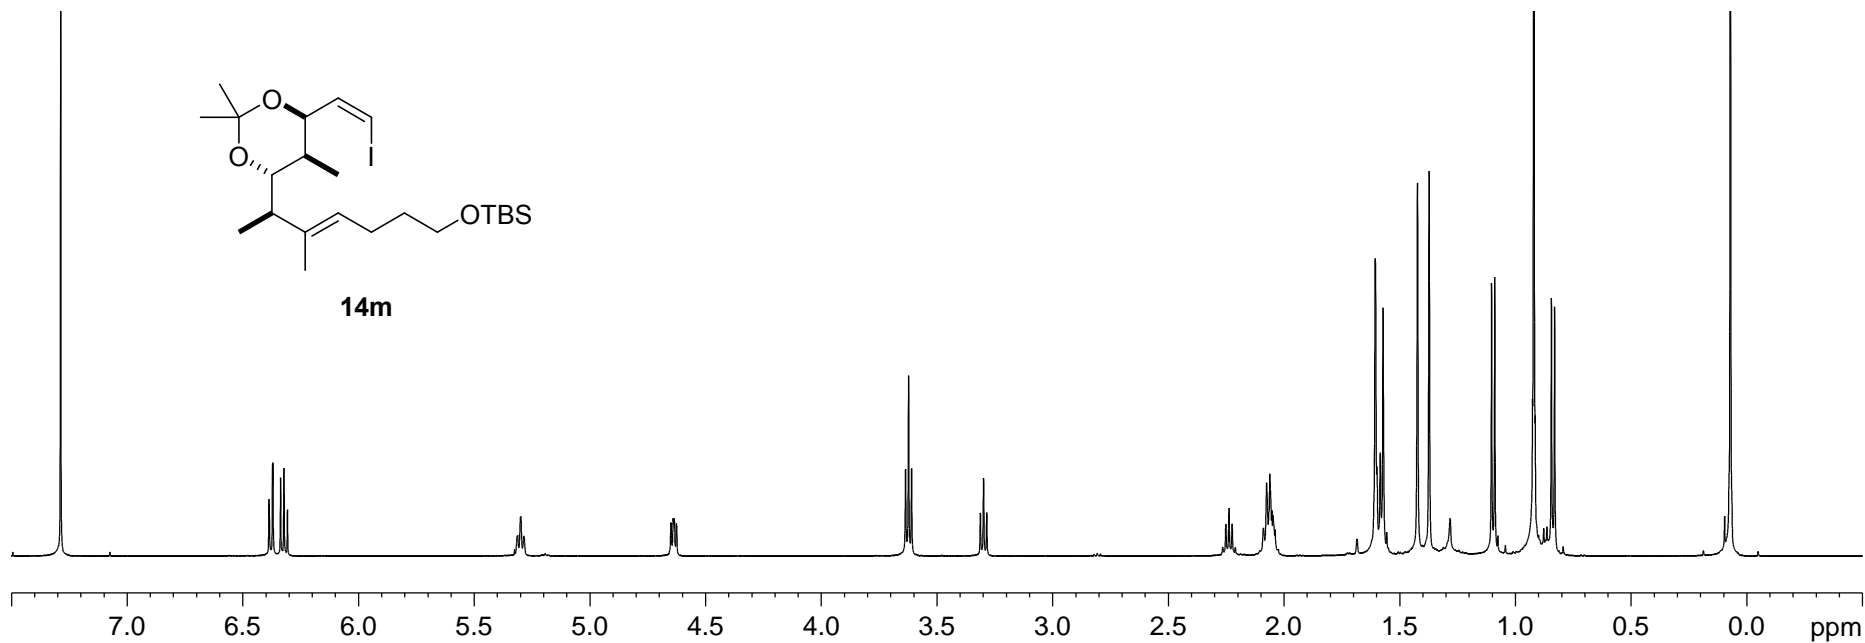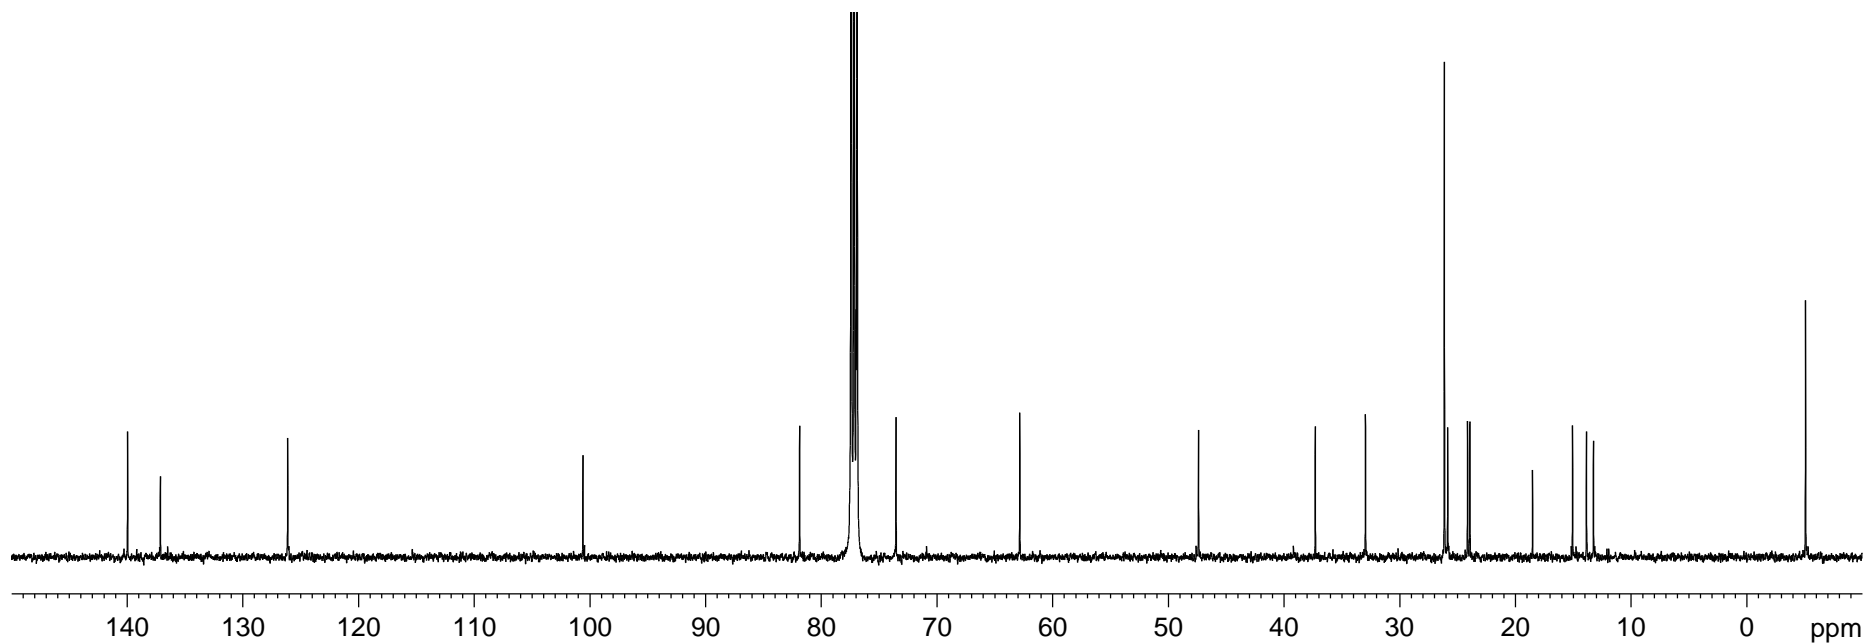



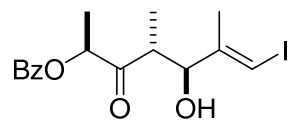

16

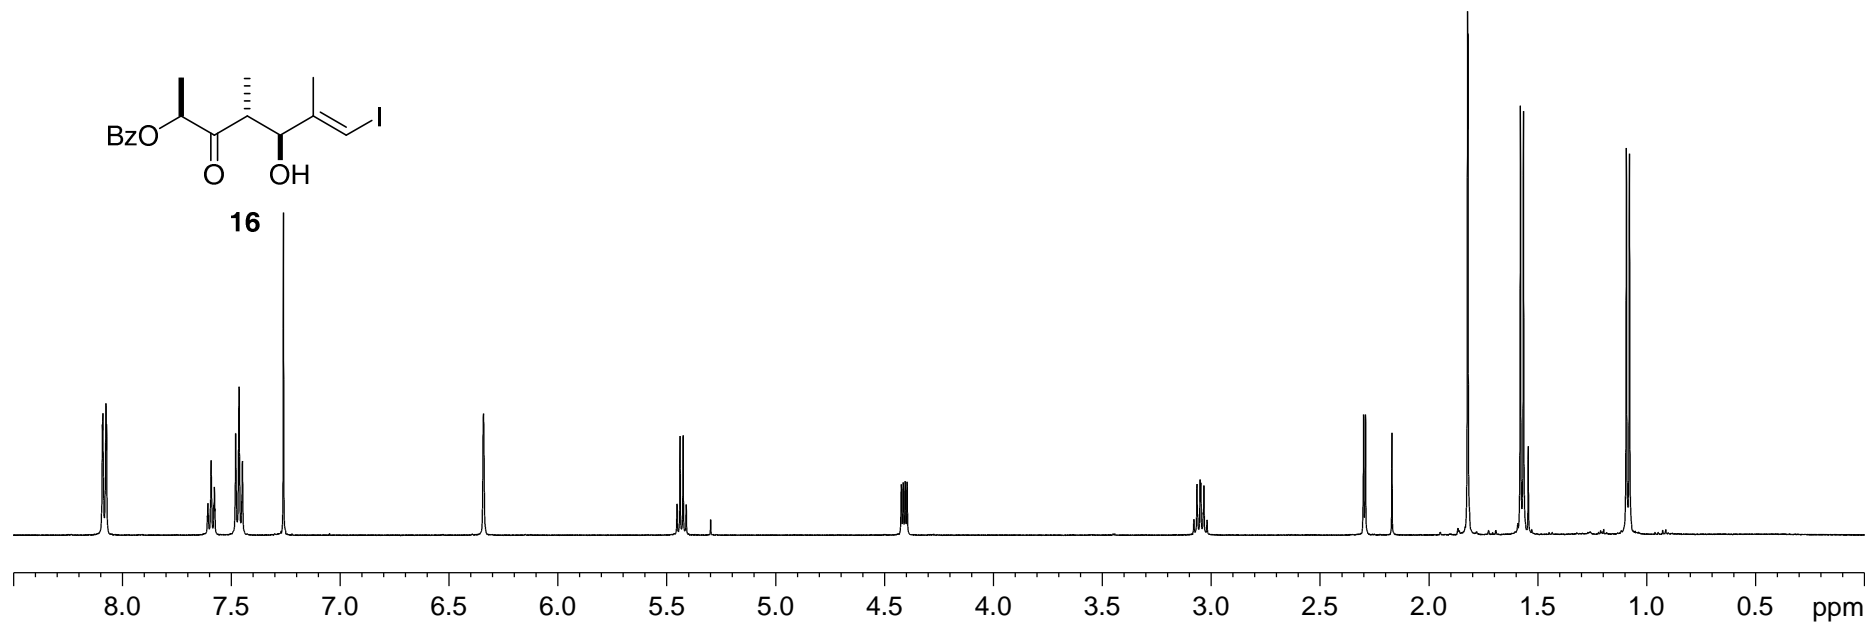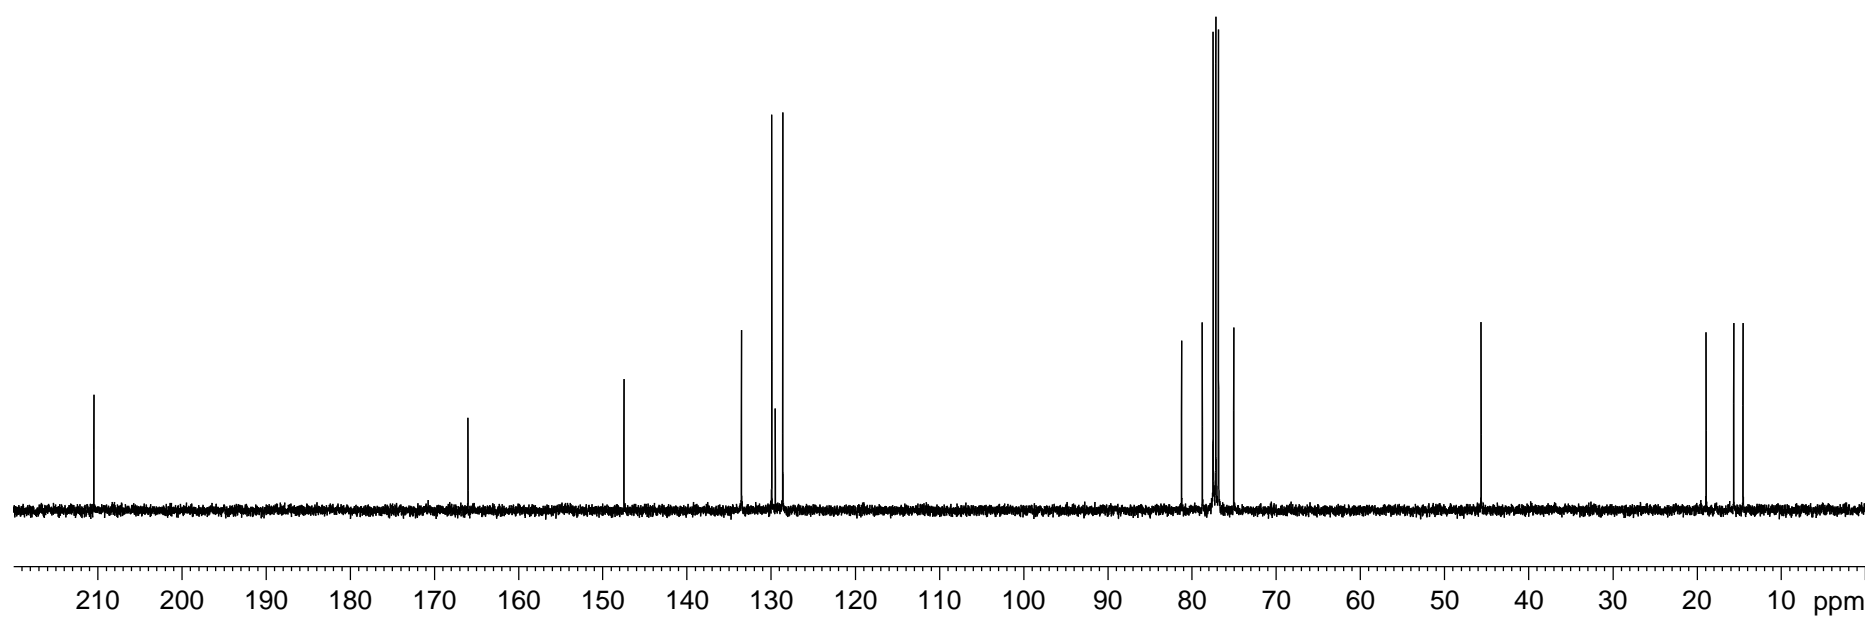

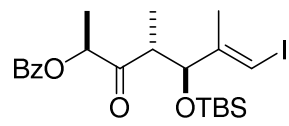

16b

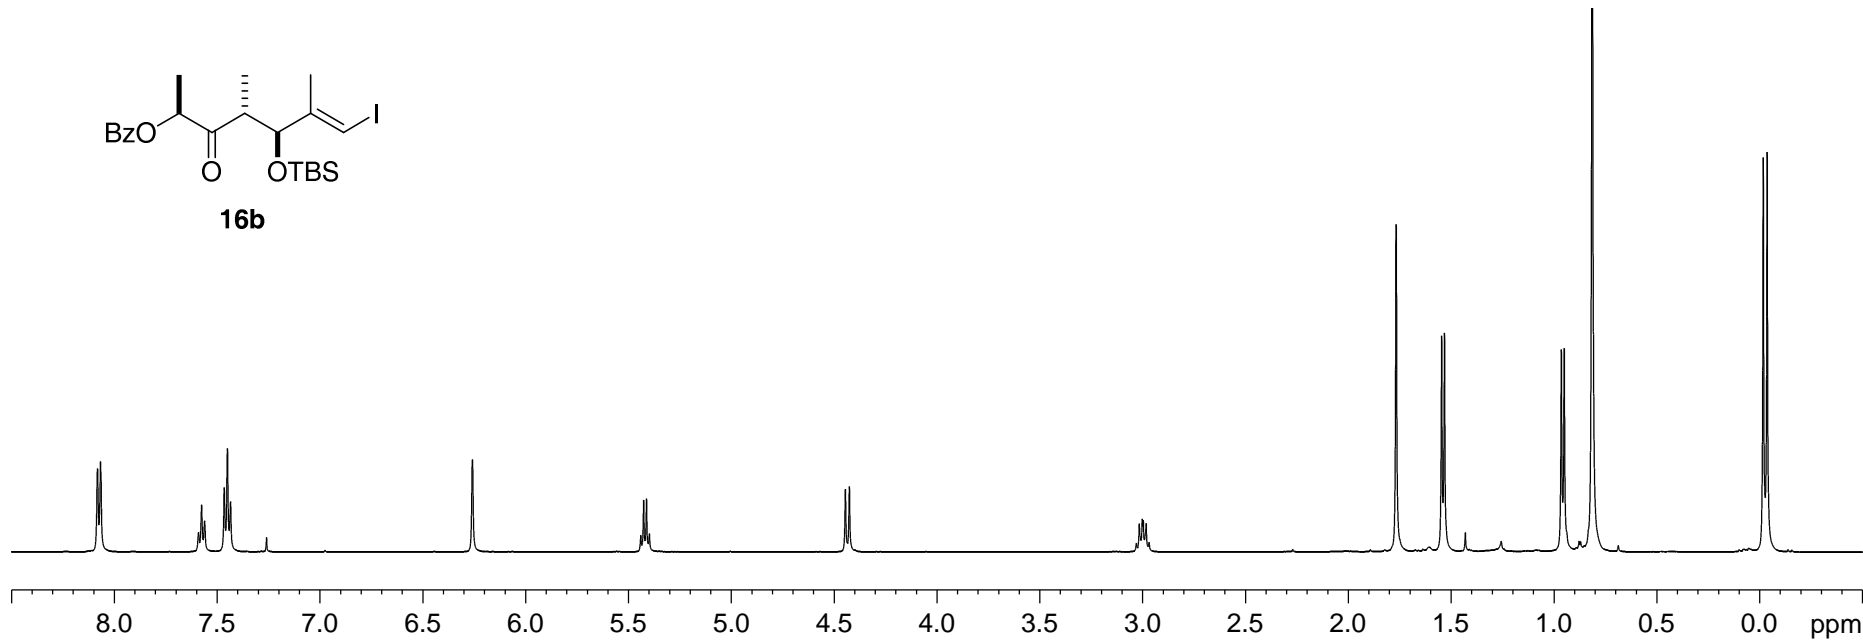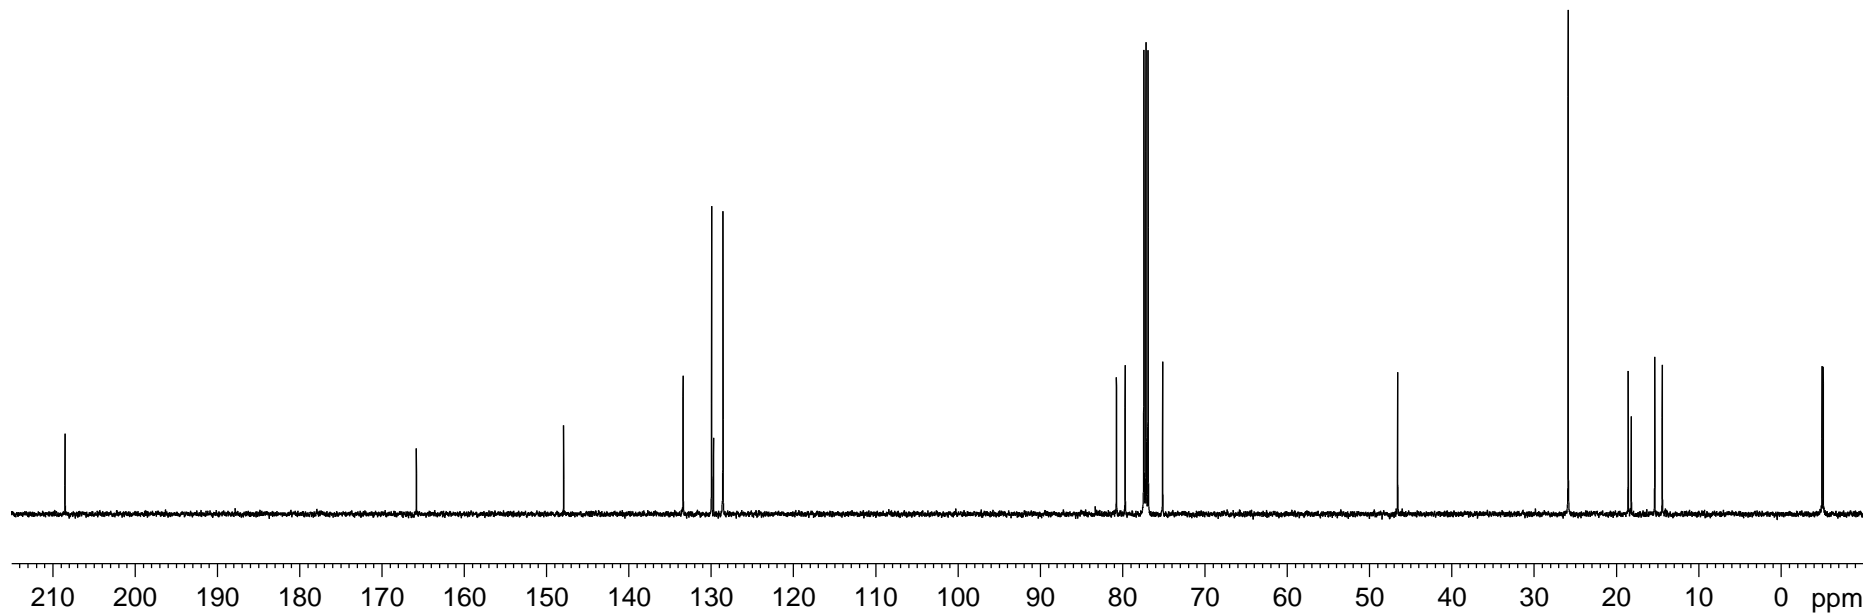

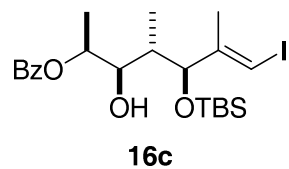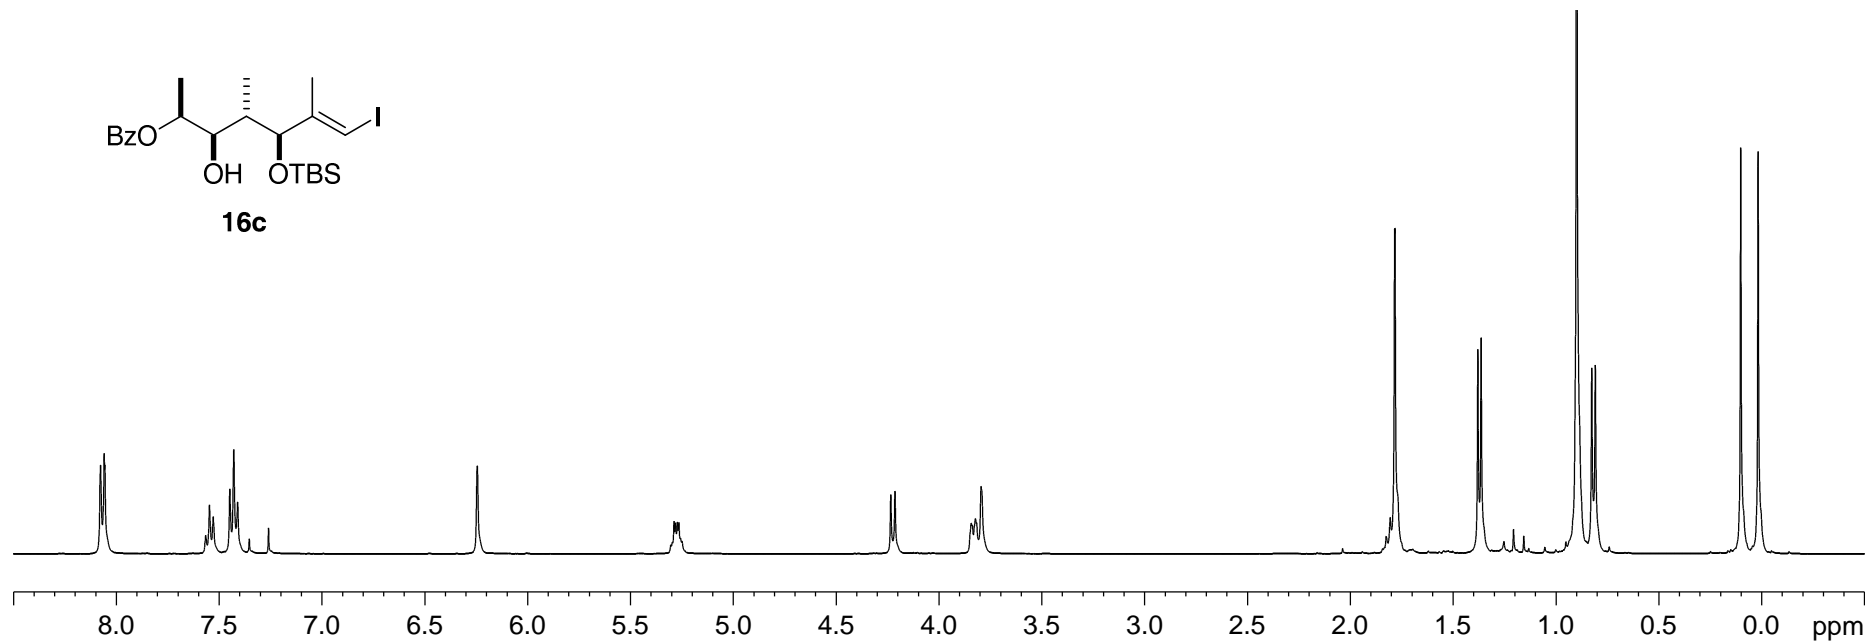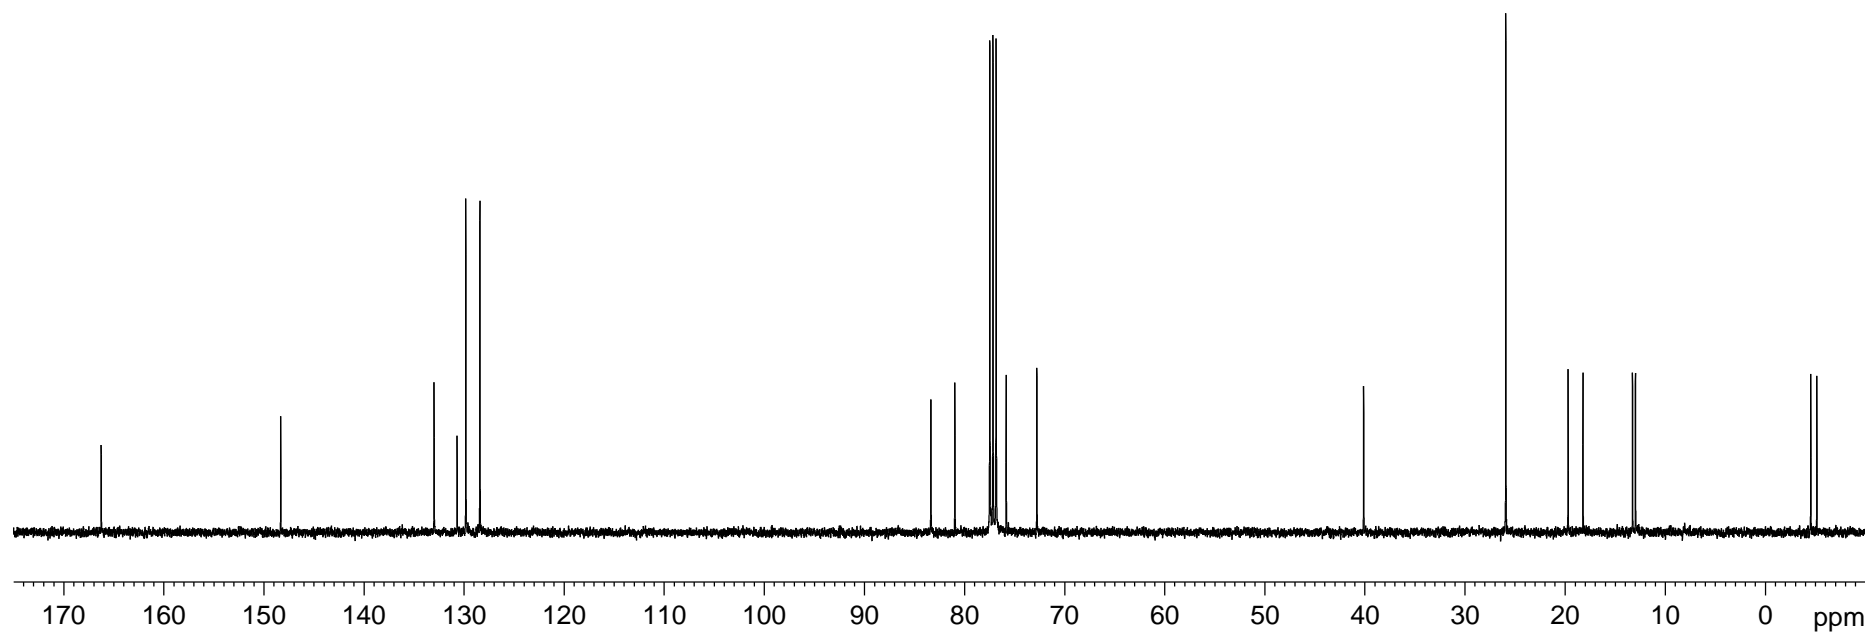

SI-55





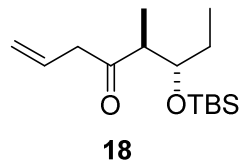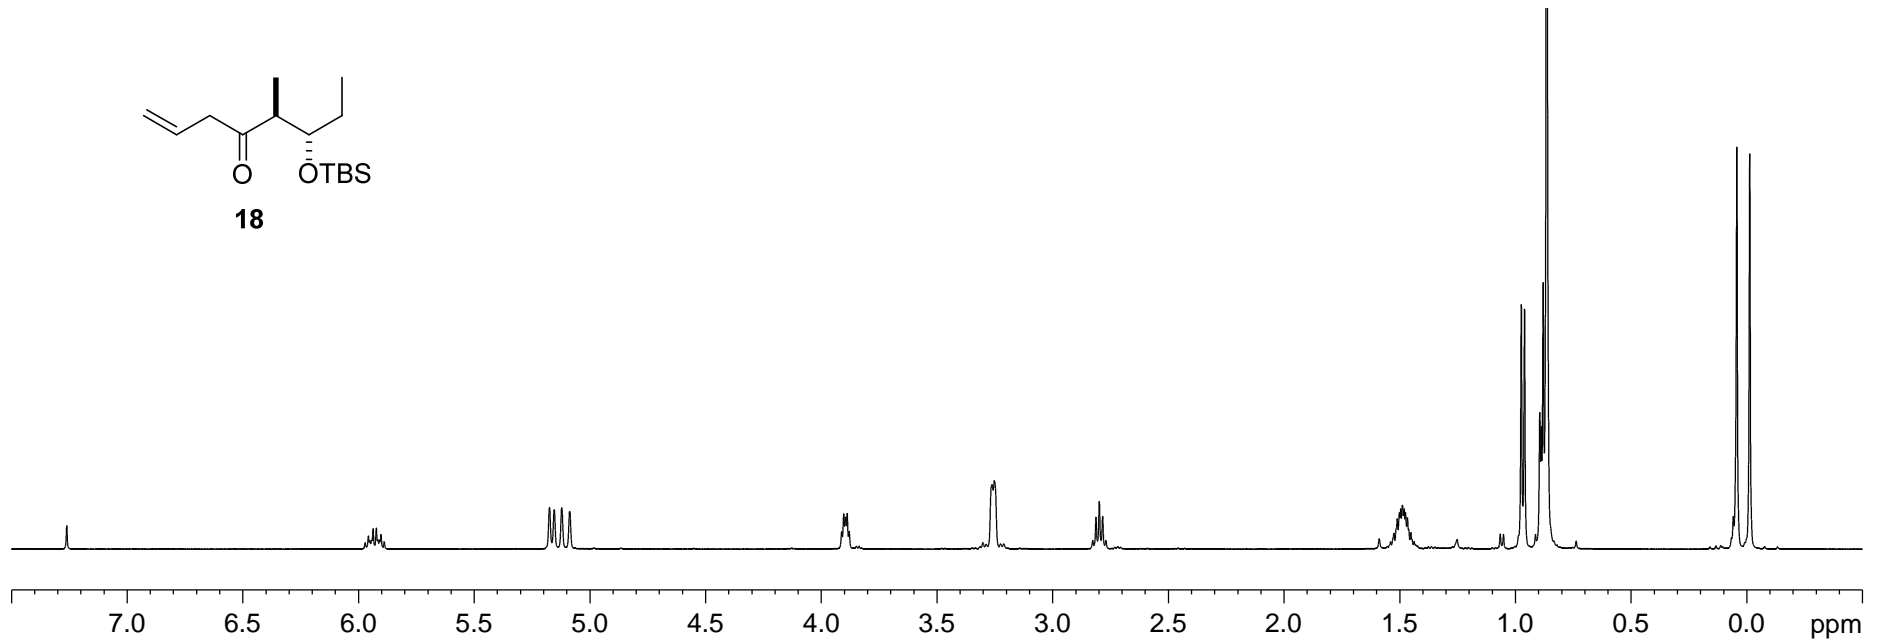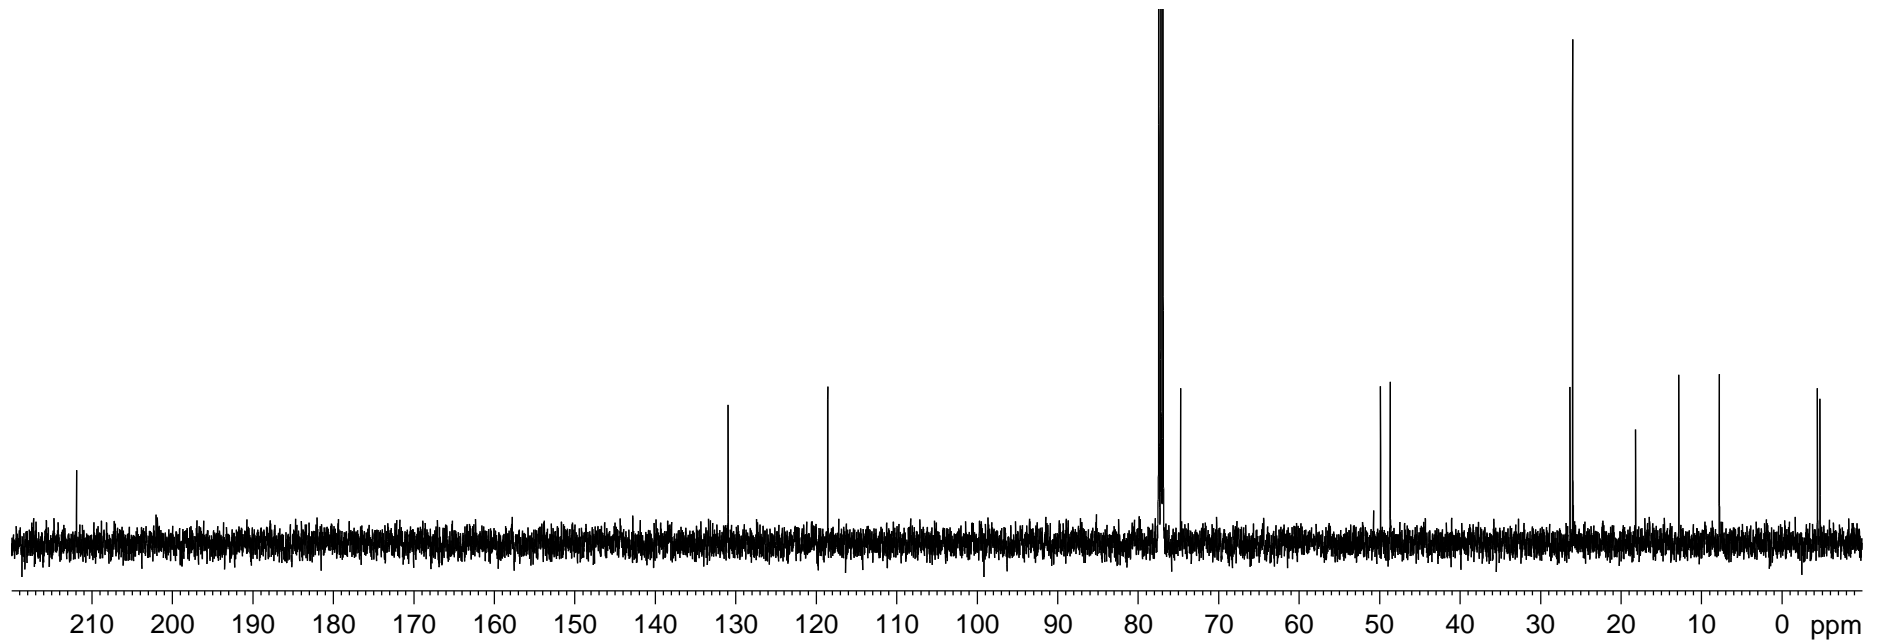

SI-57

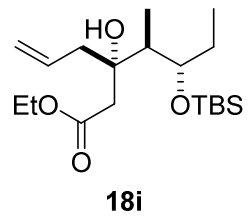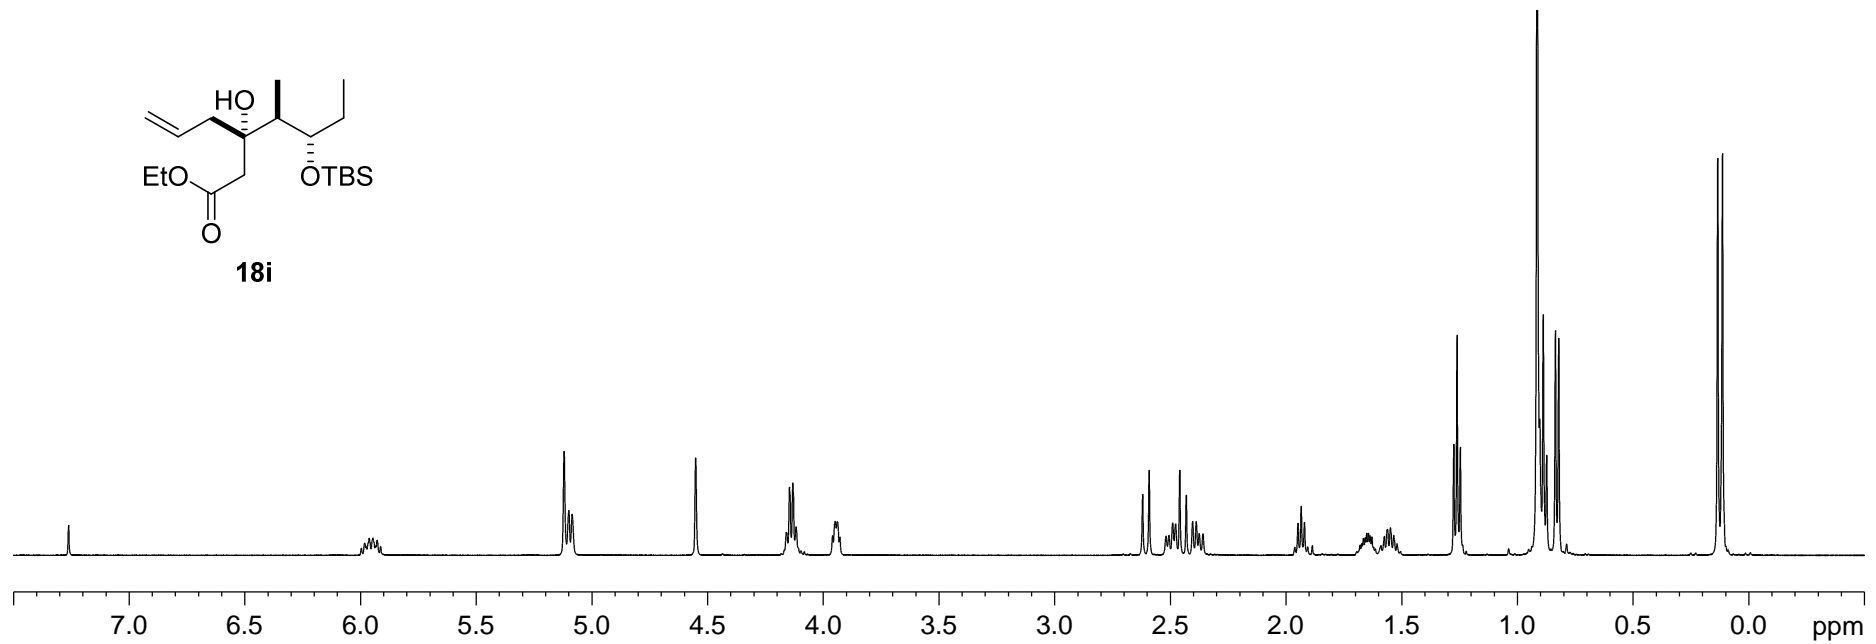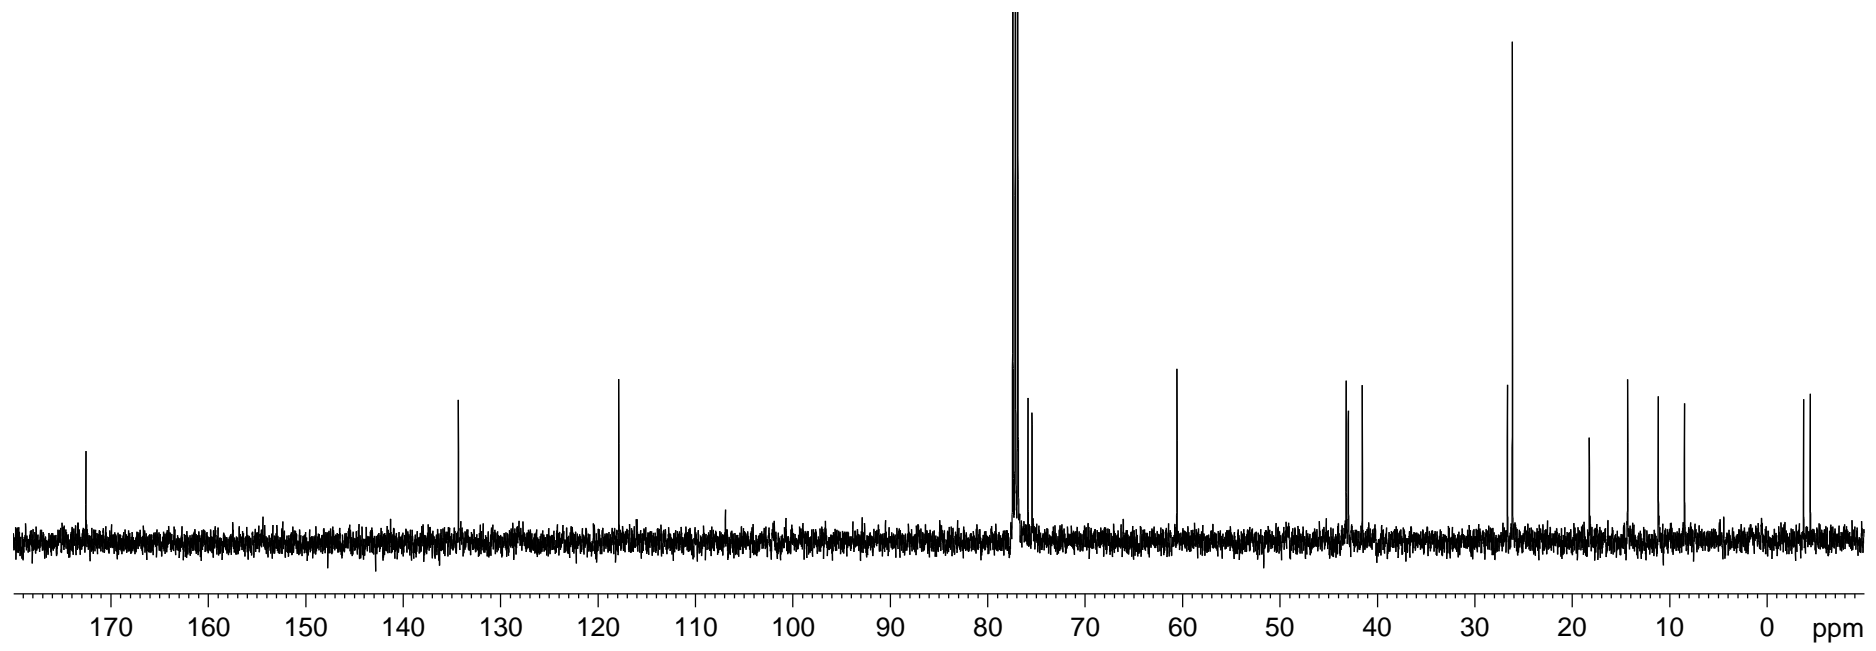

SI-58

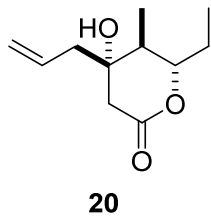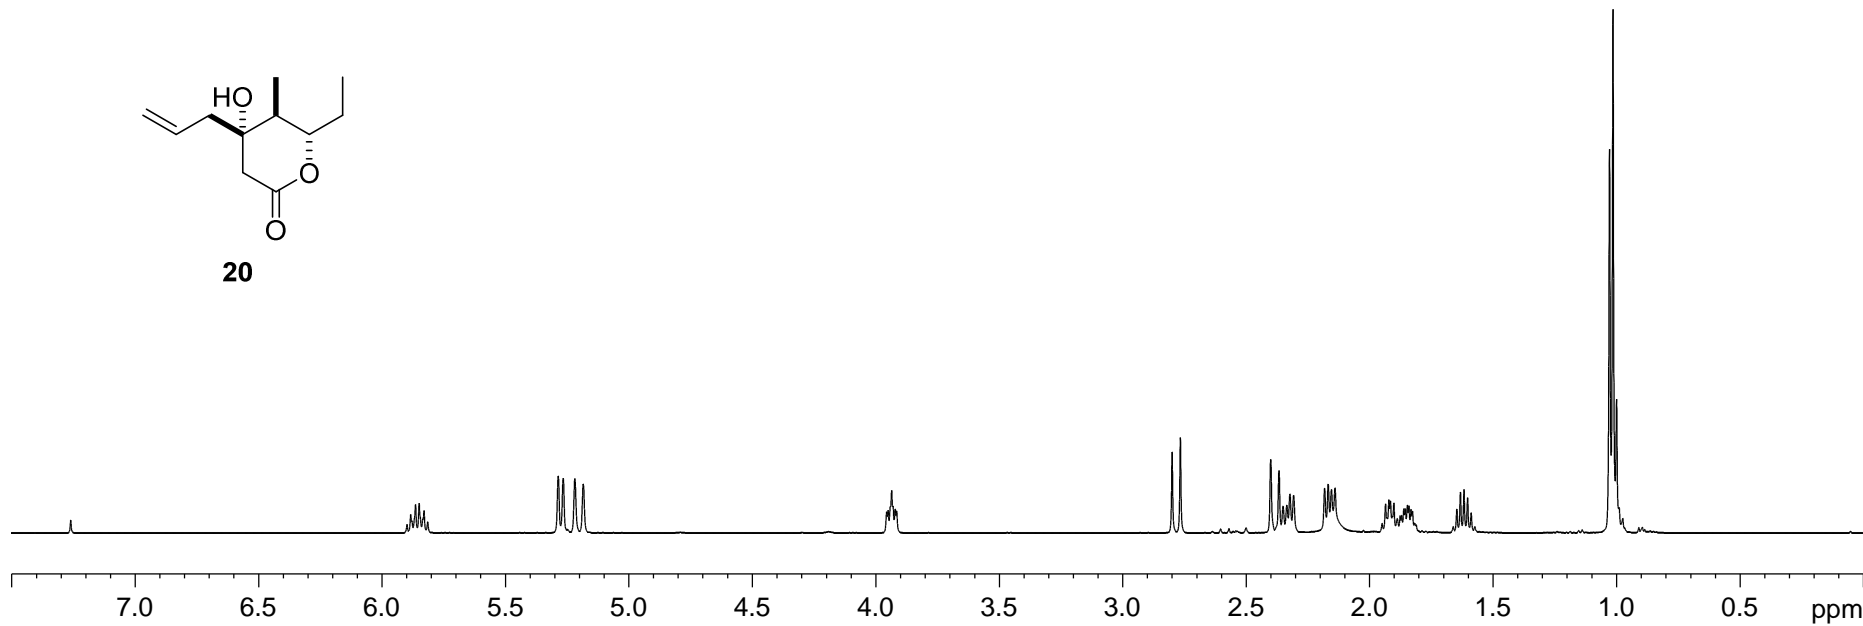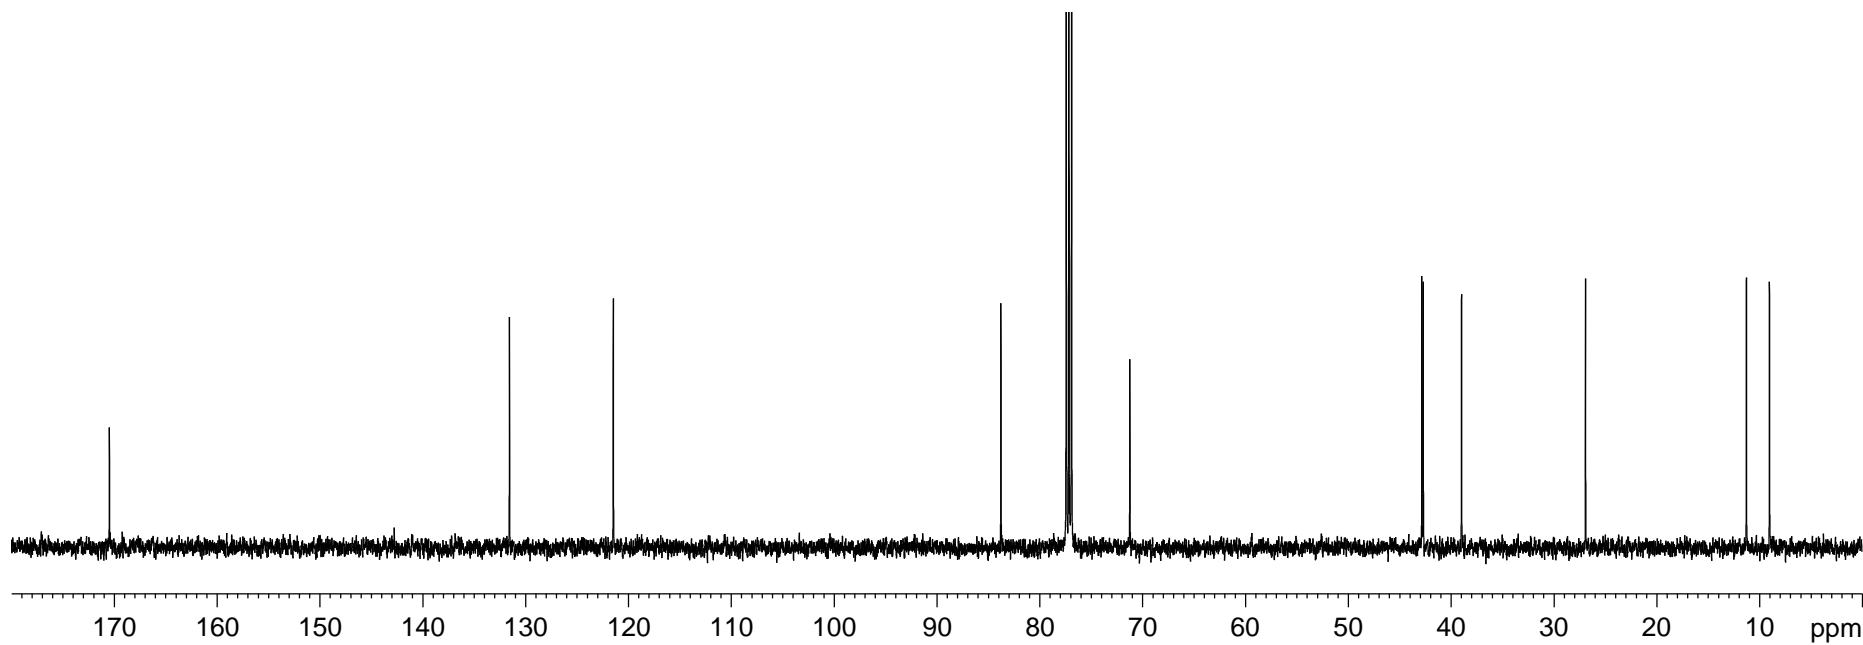

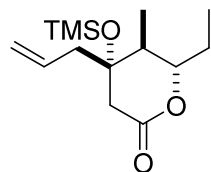

6

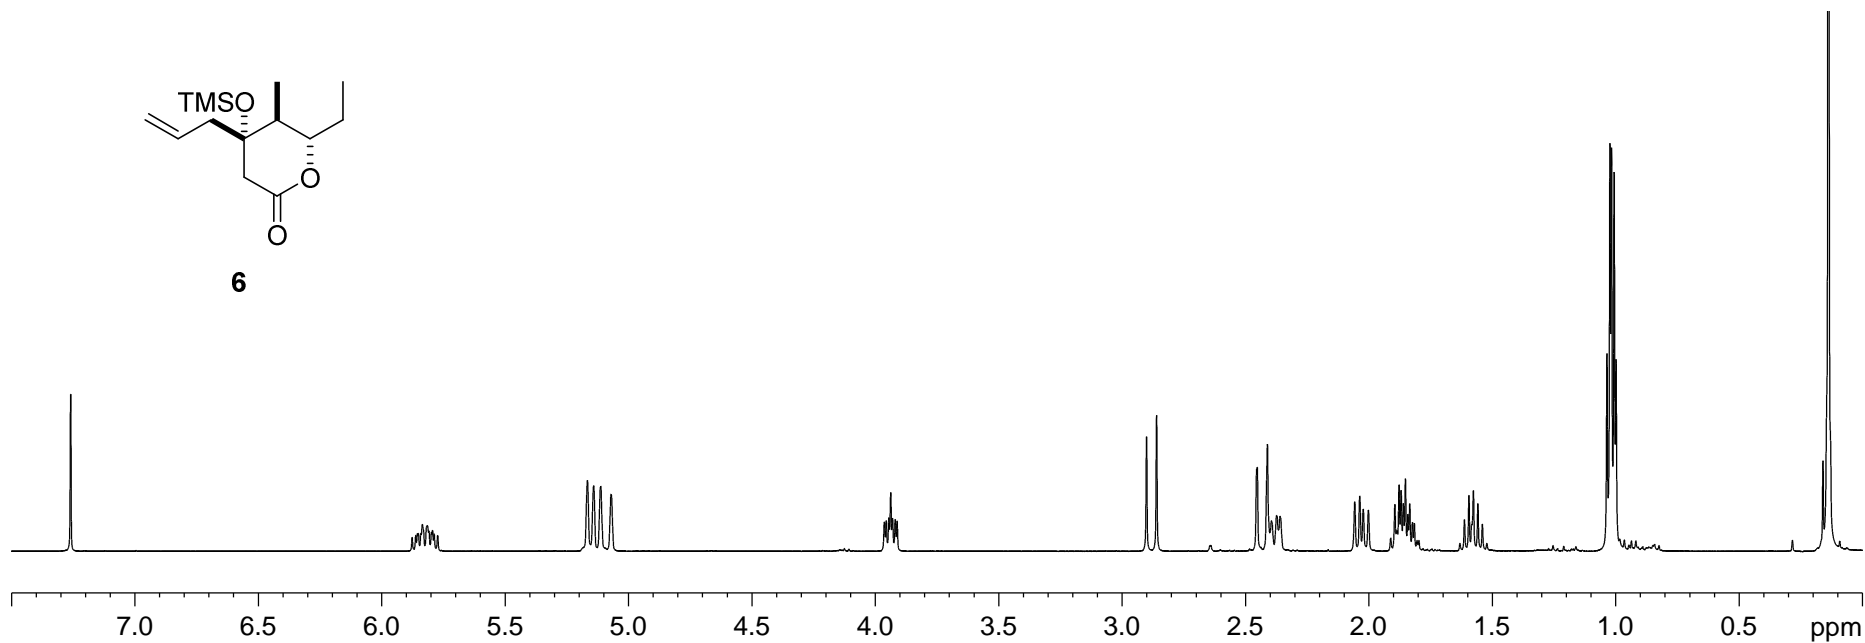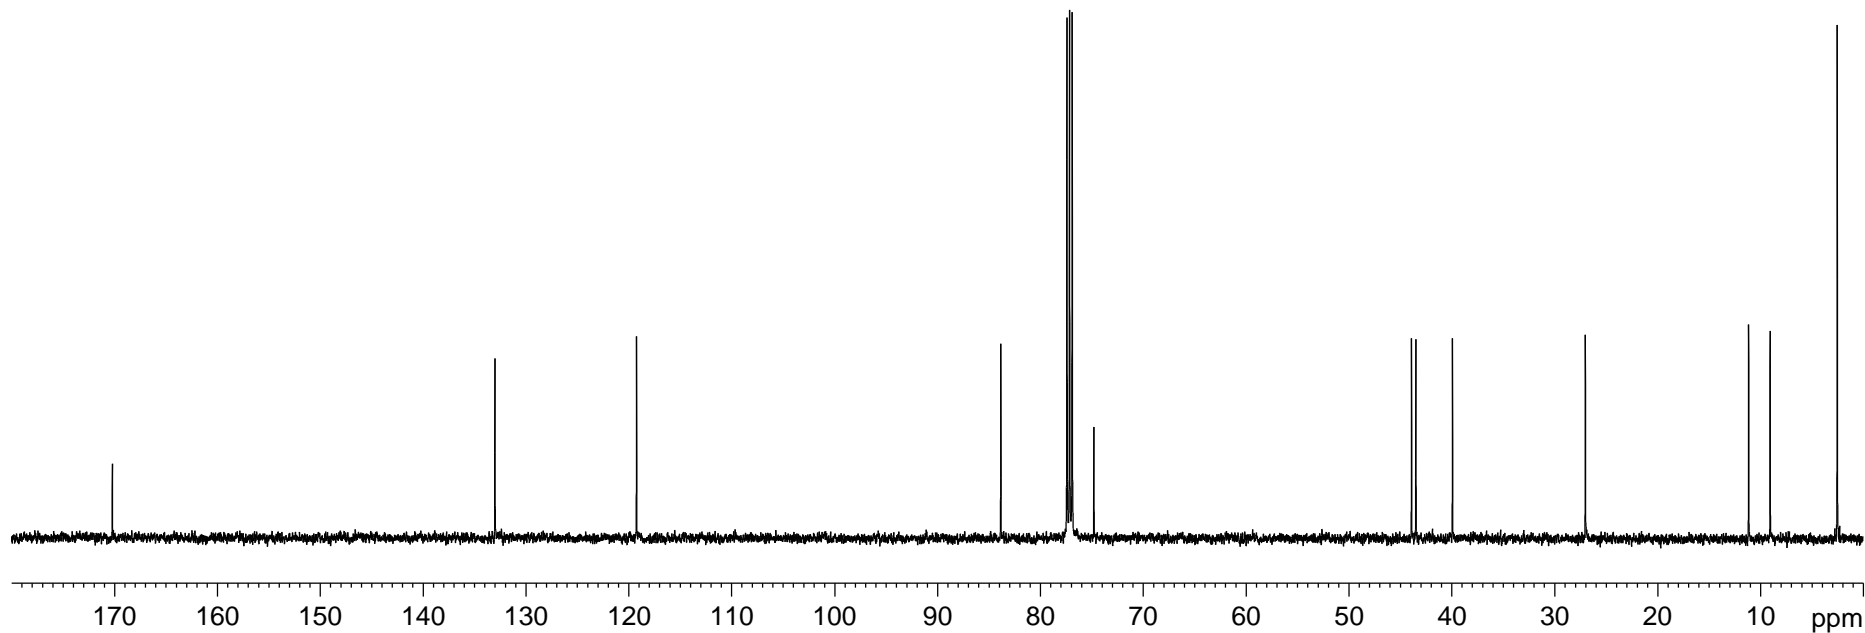

SI-60

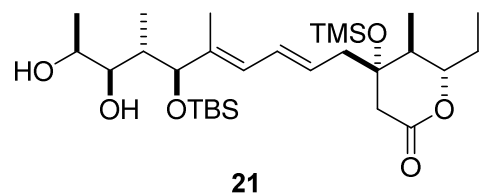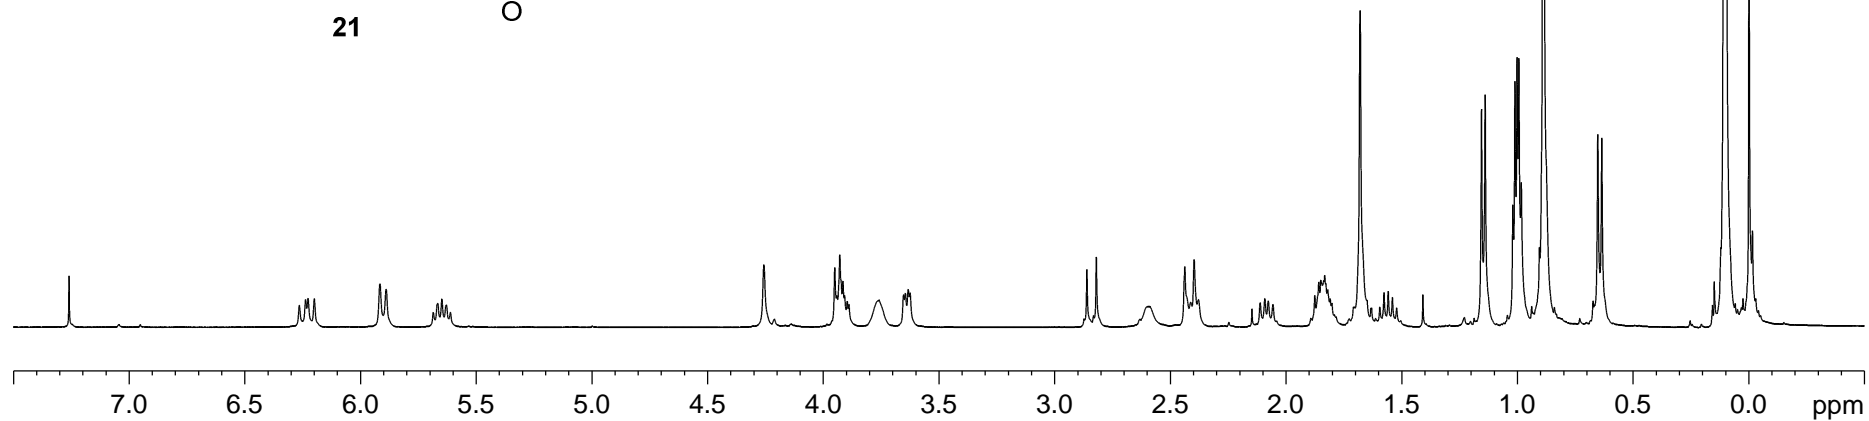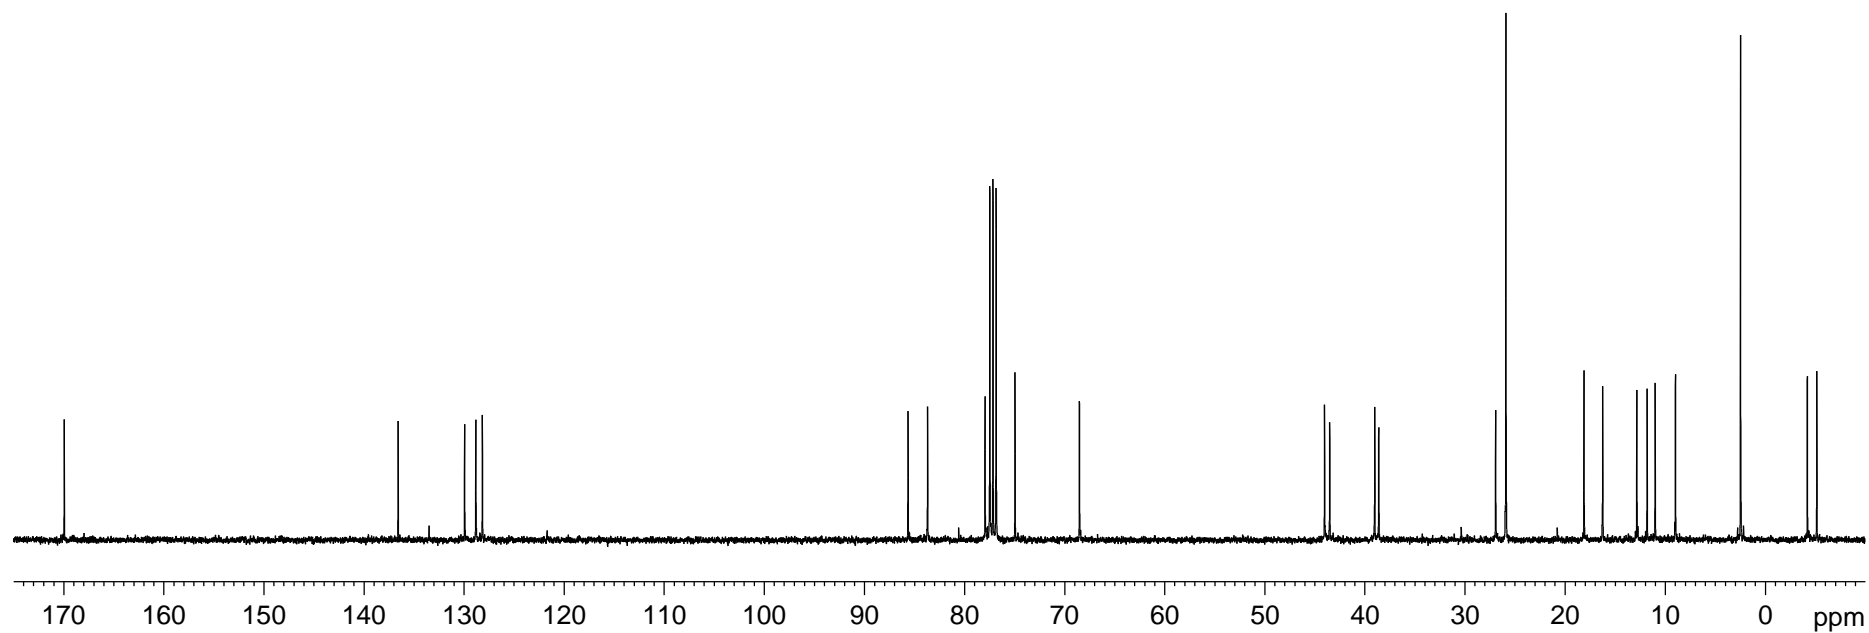

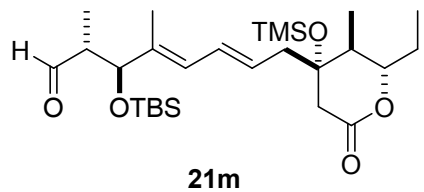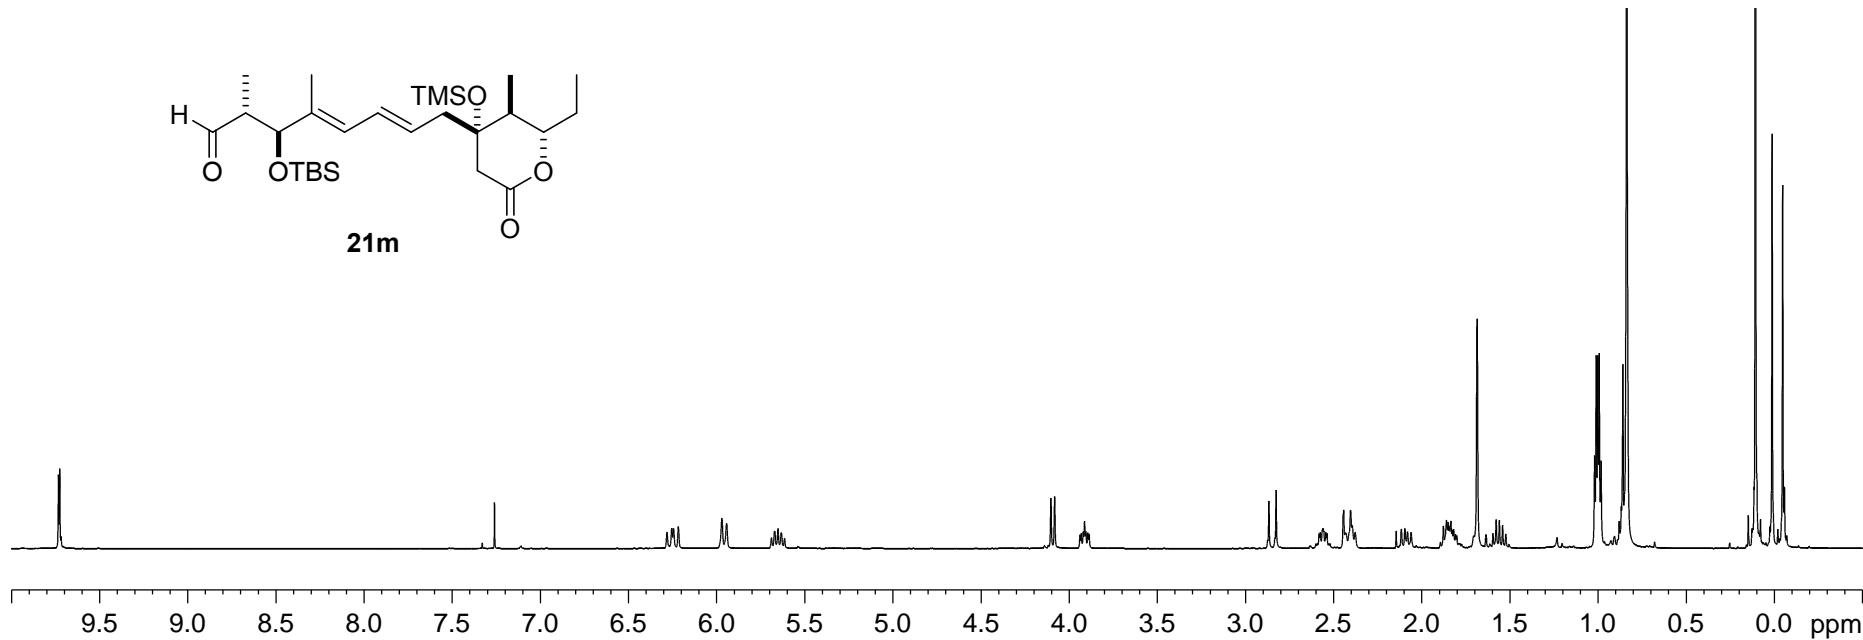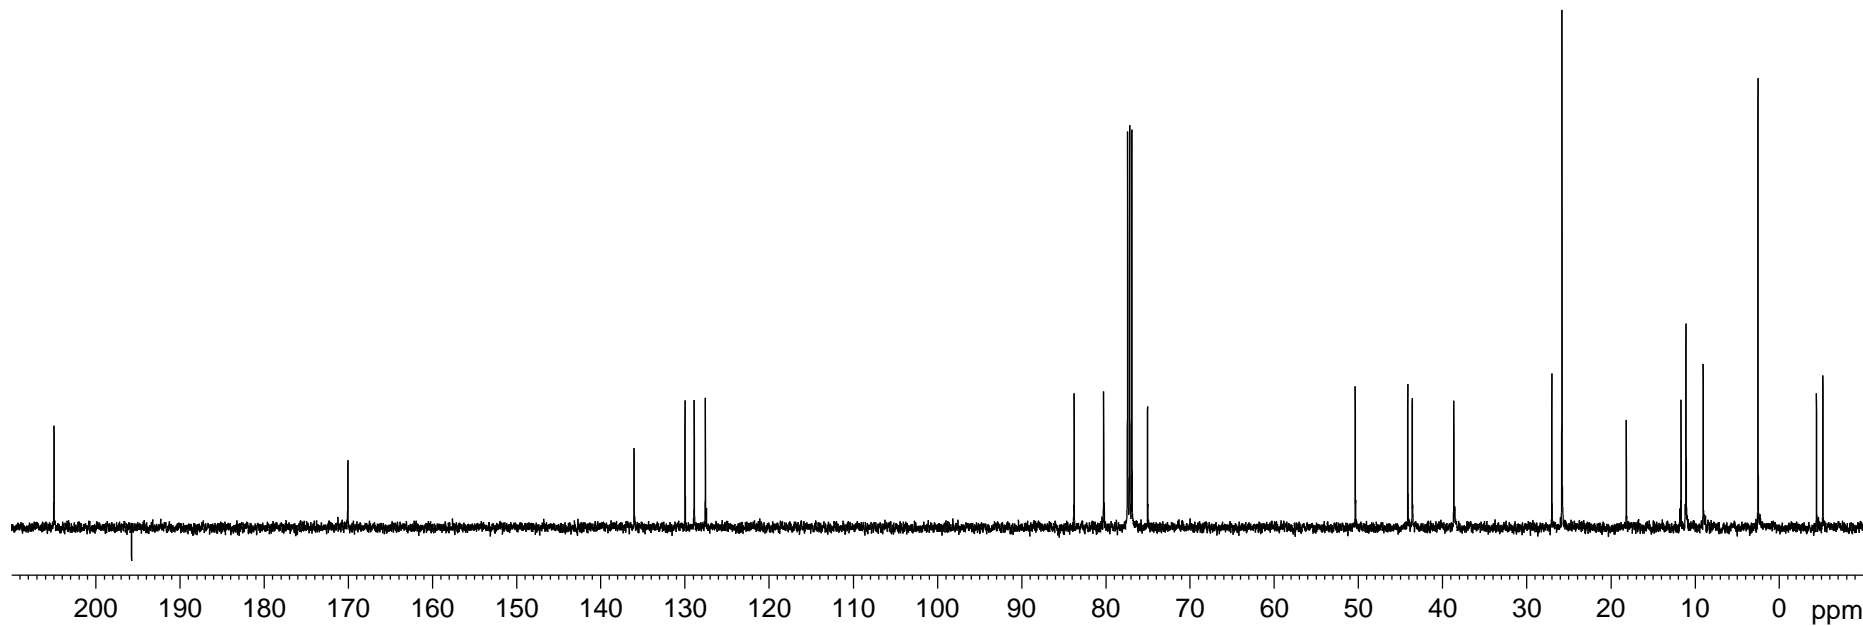

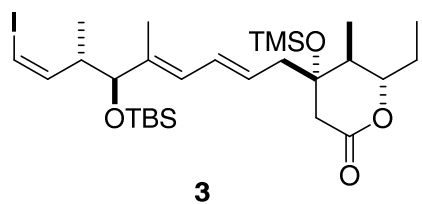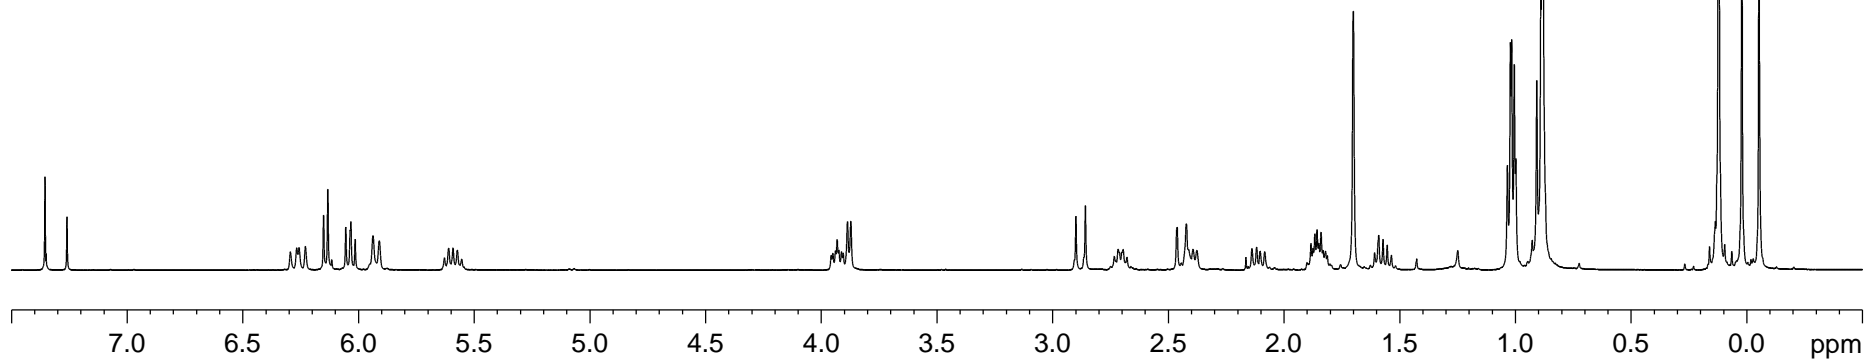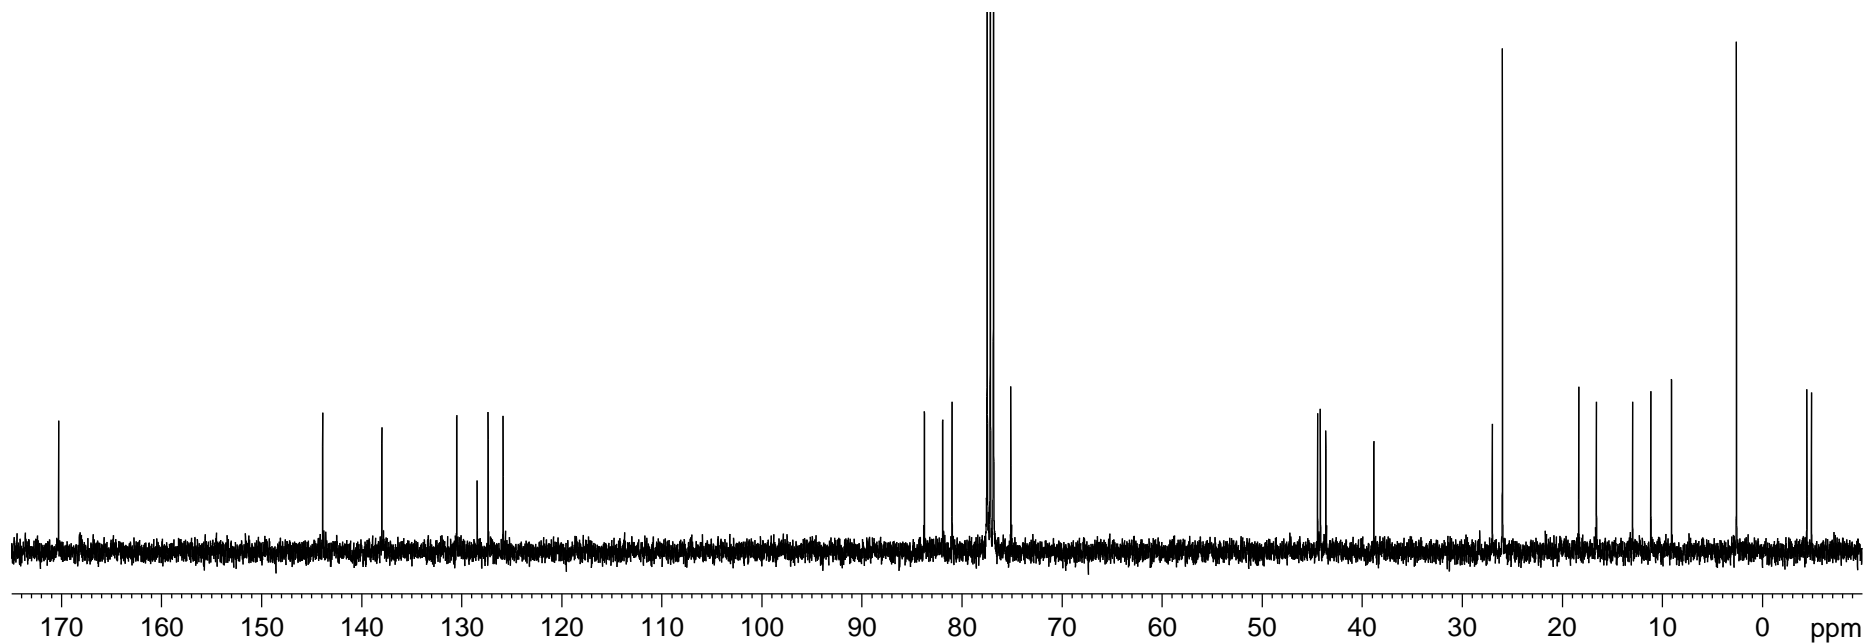





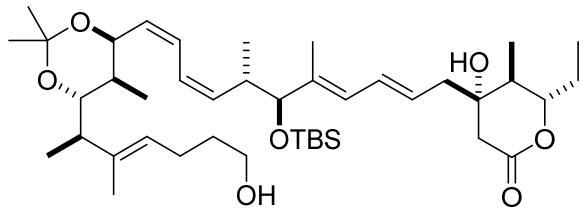

22b

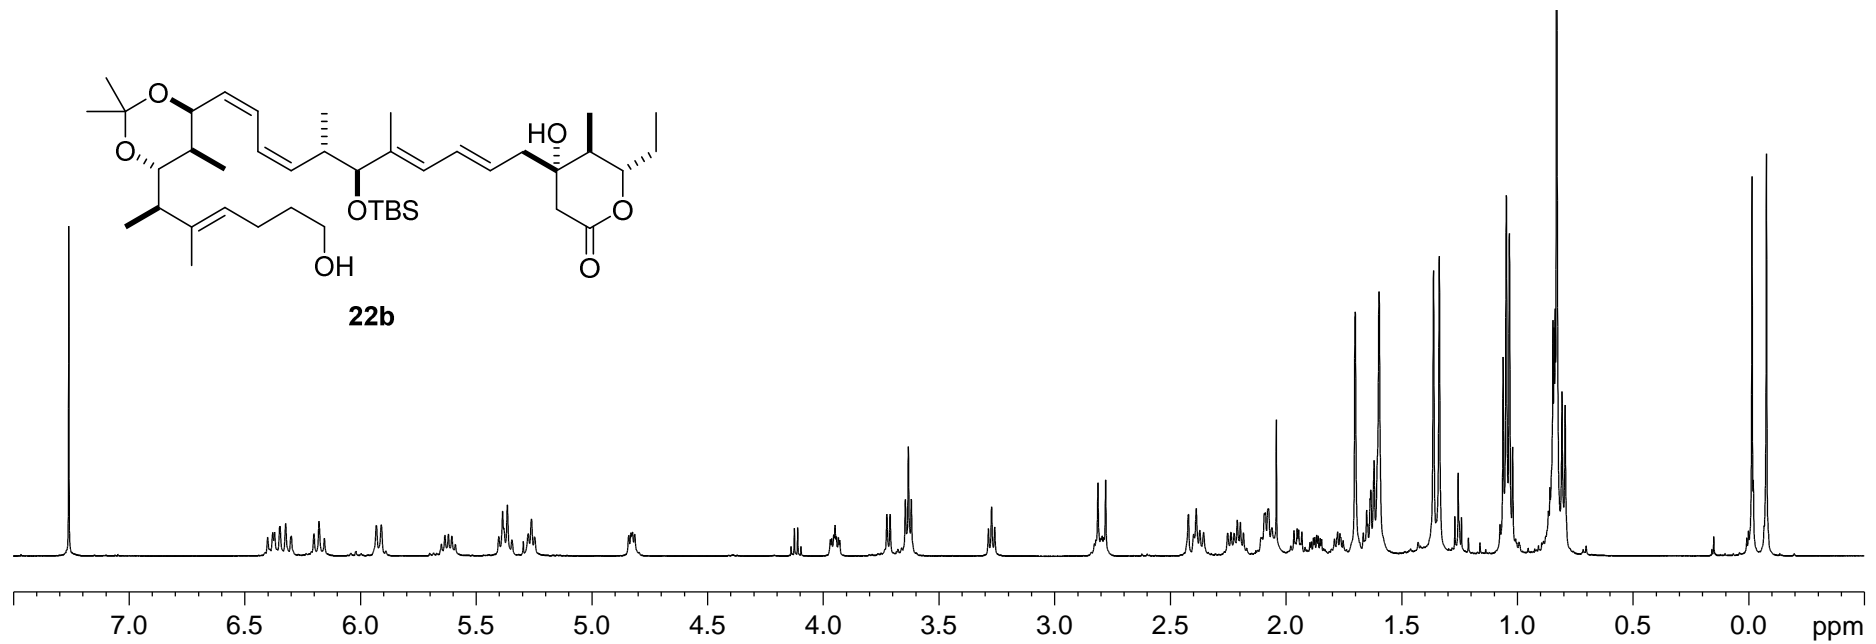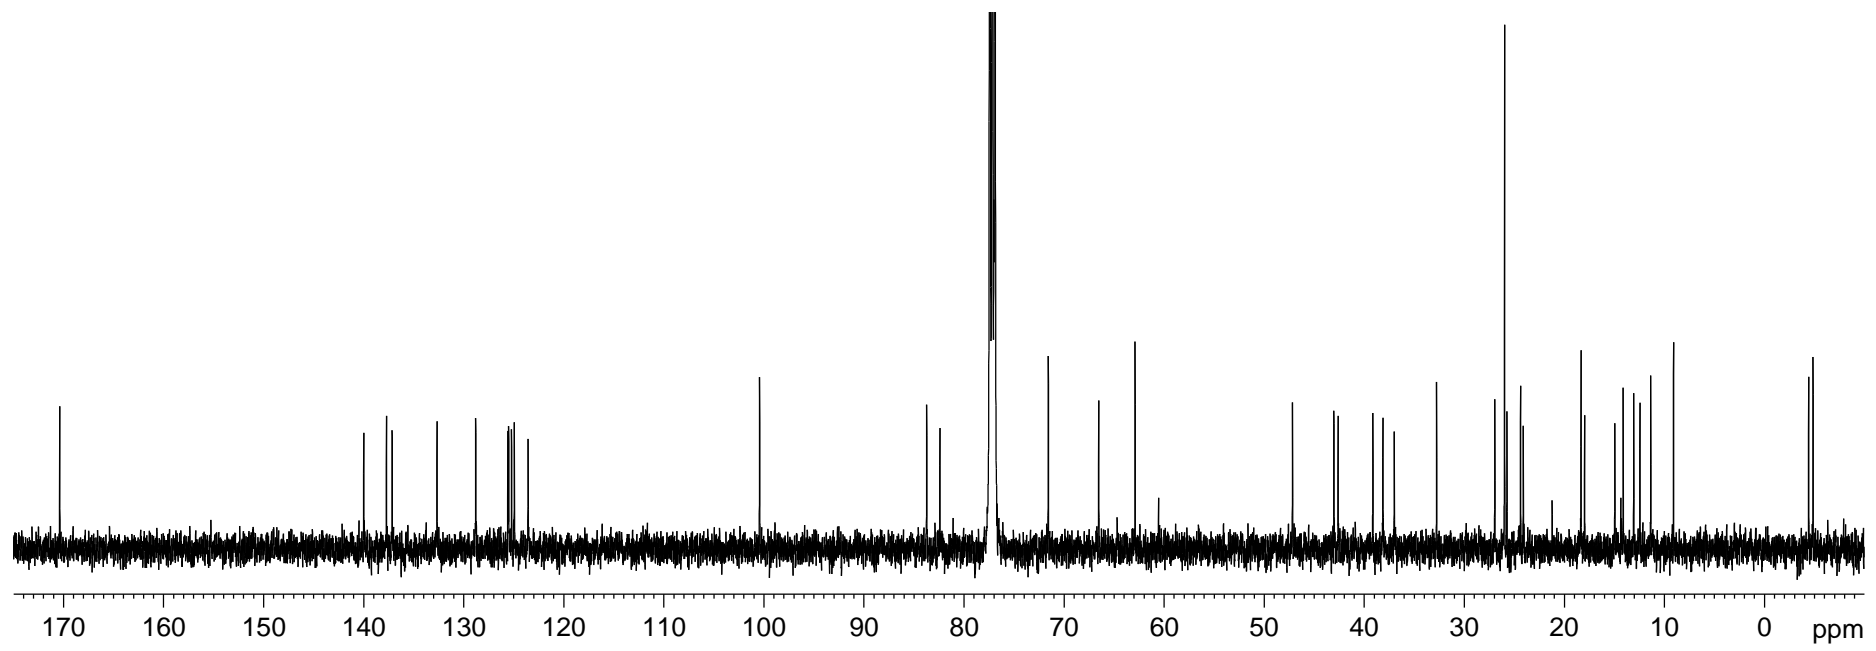

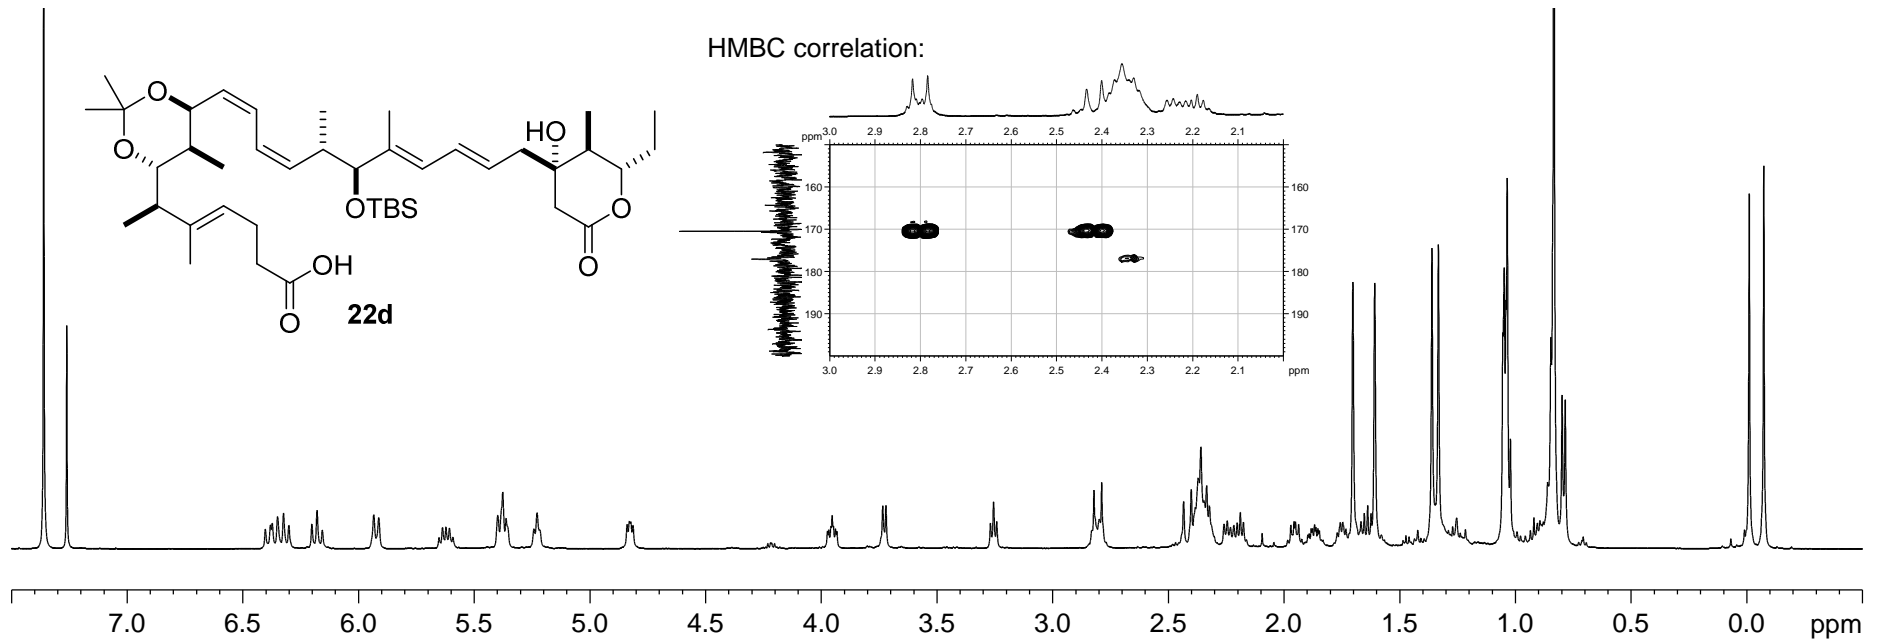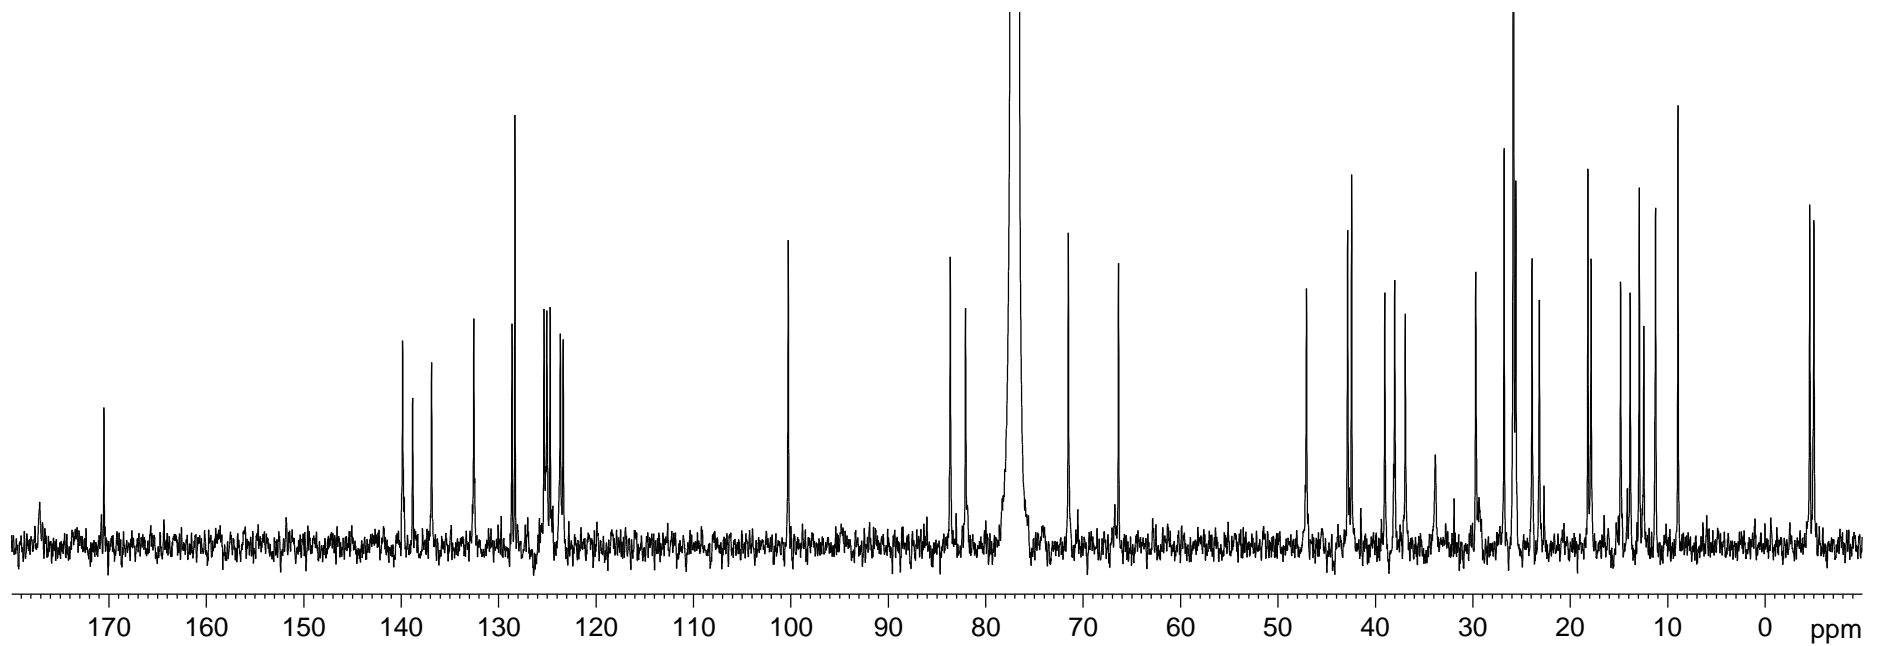

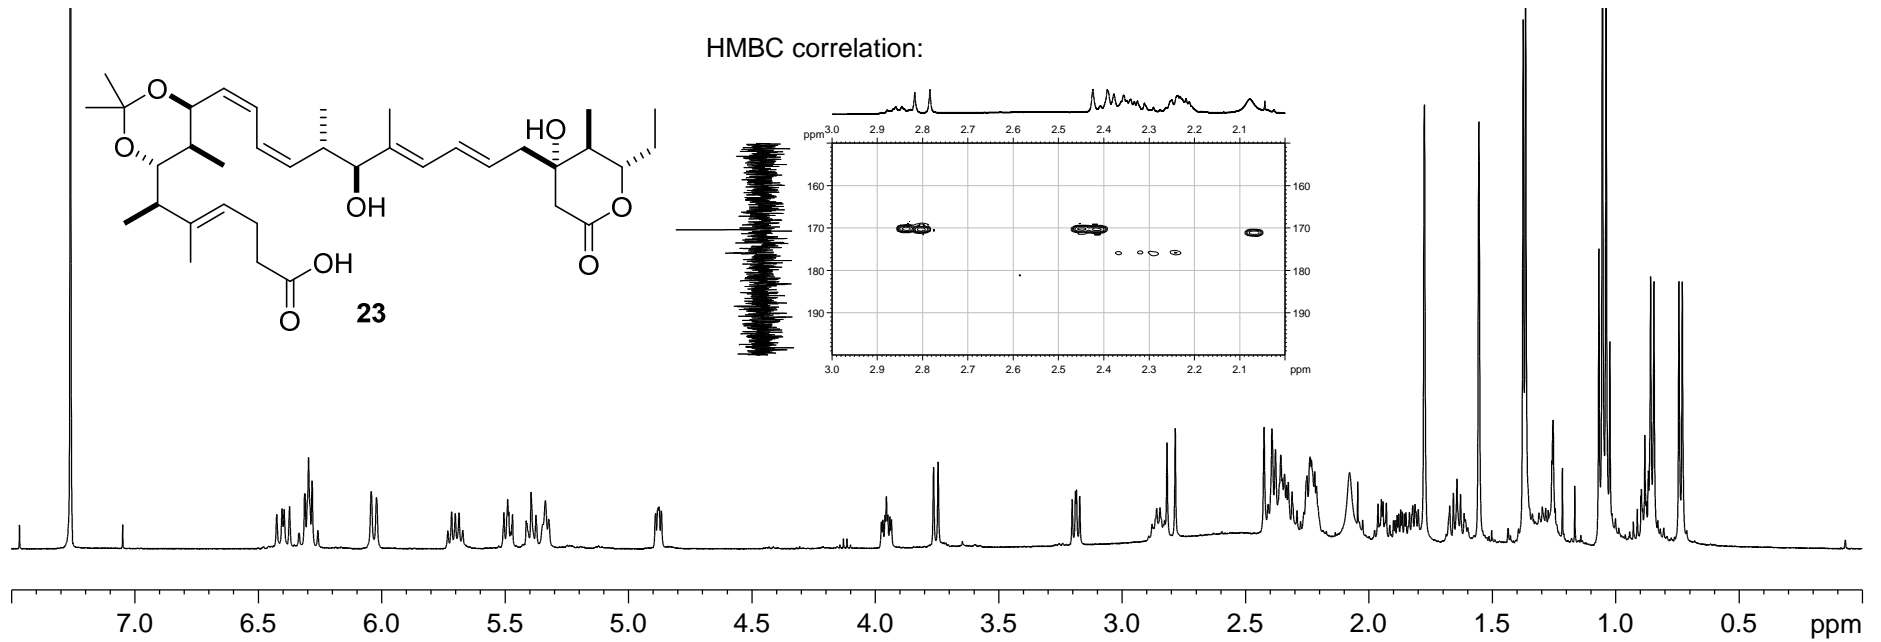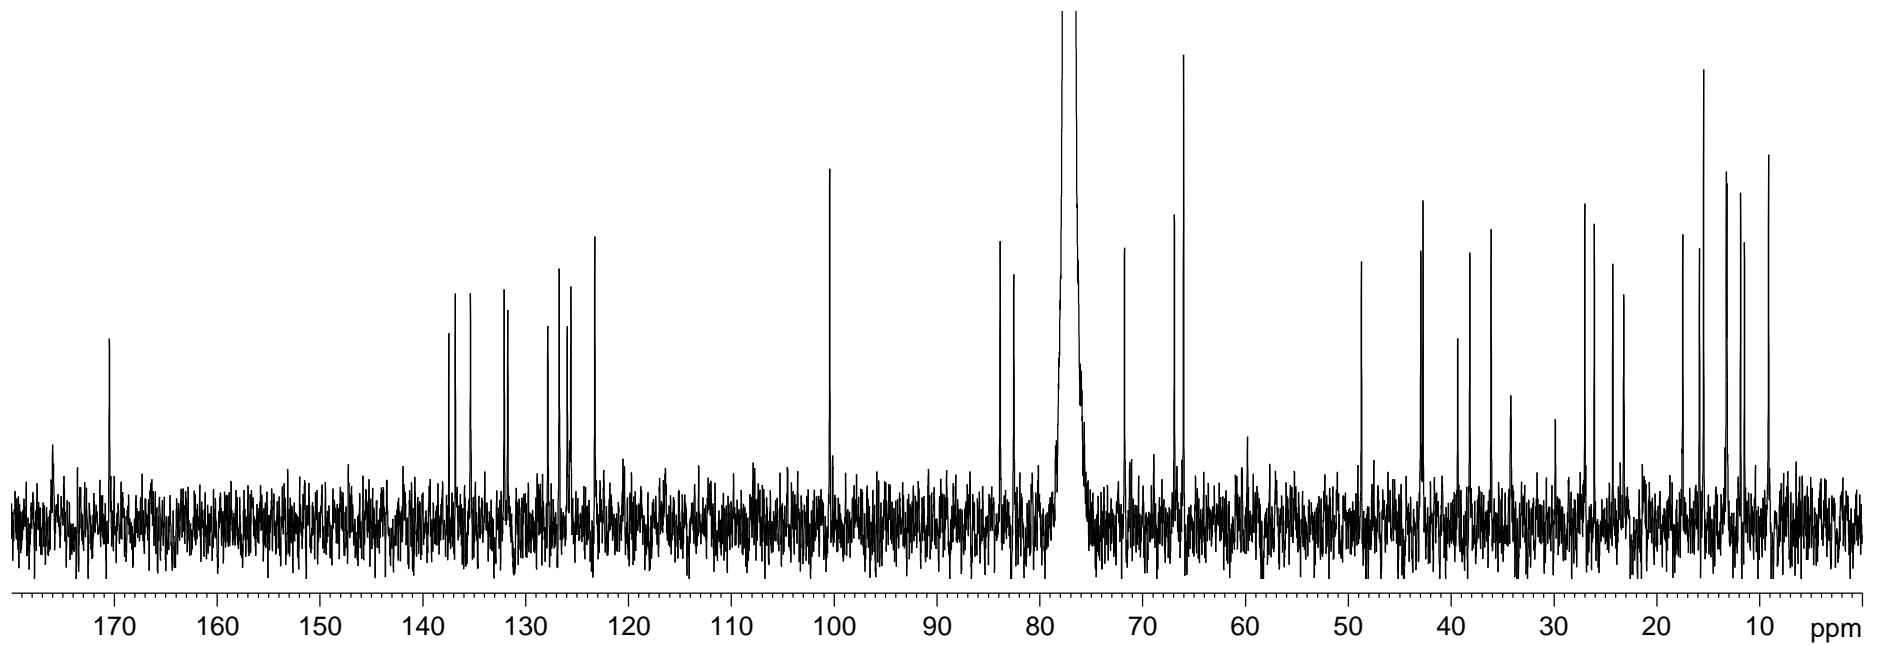







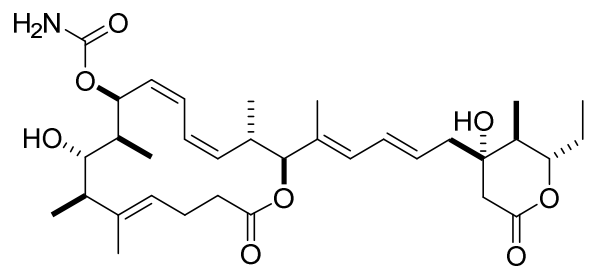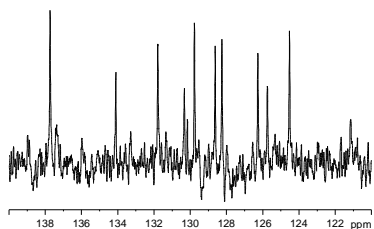

synthetic 1

1

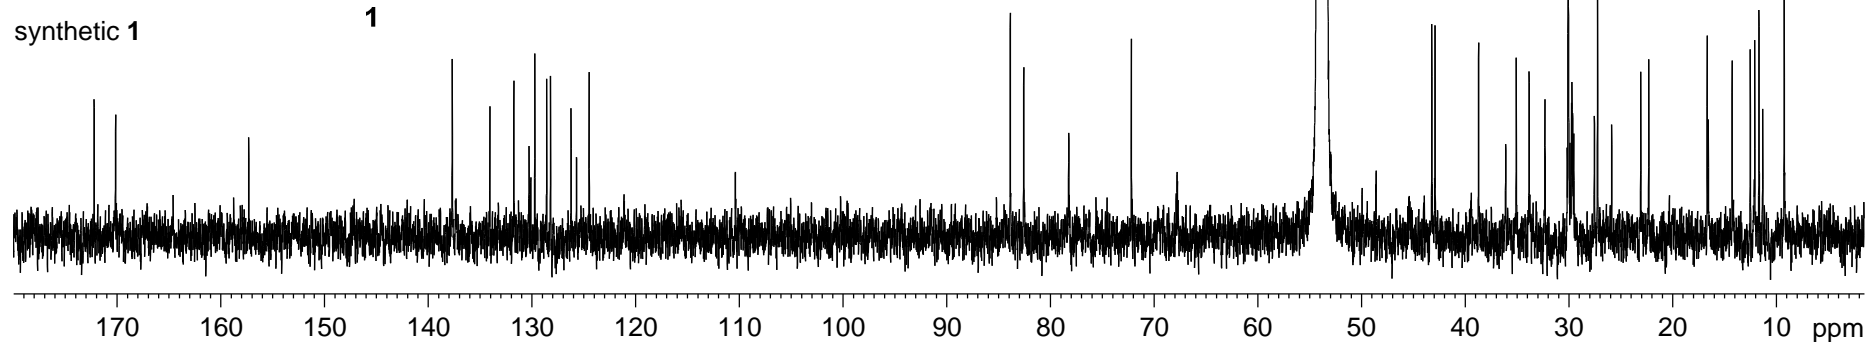

authentic 1

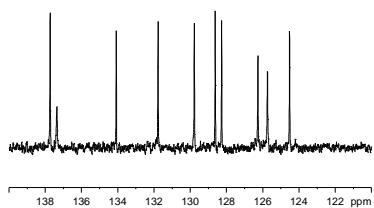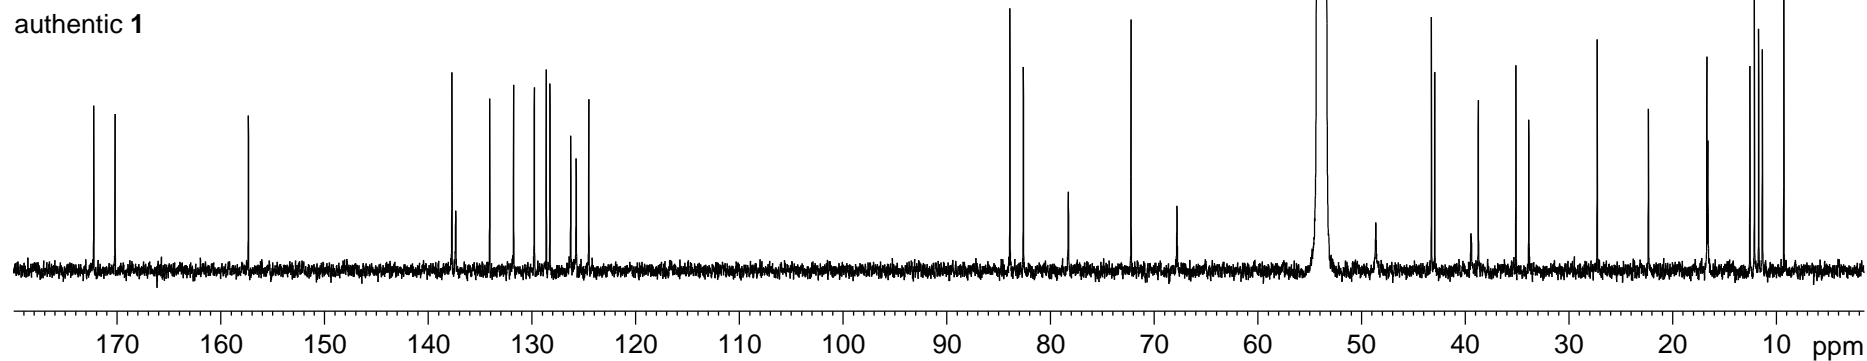





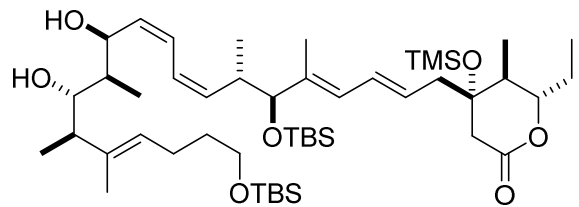

SI2

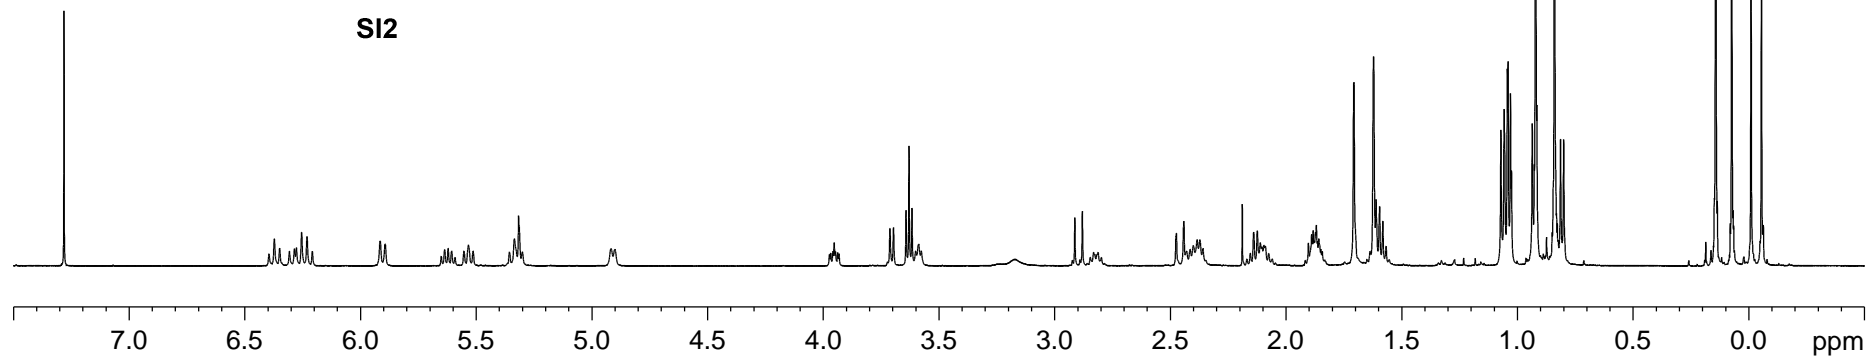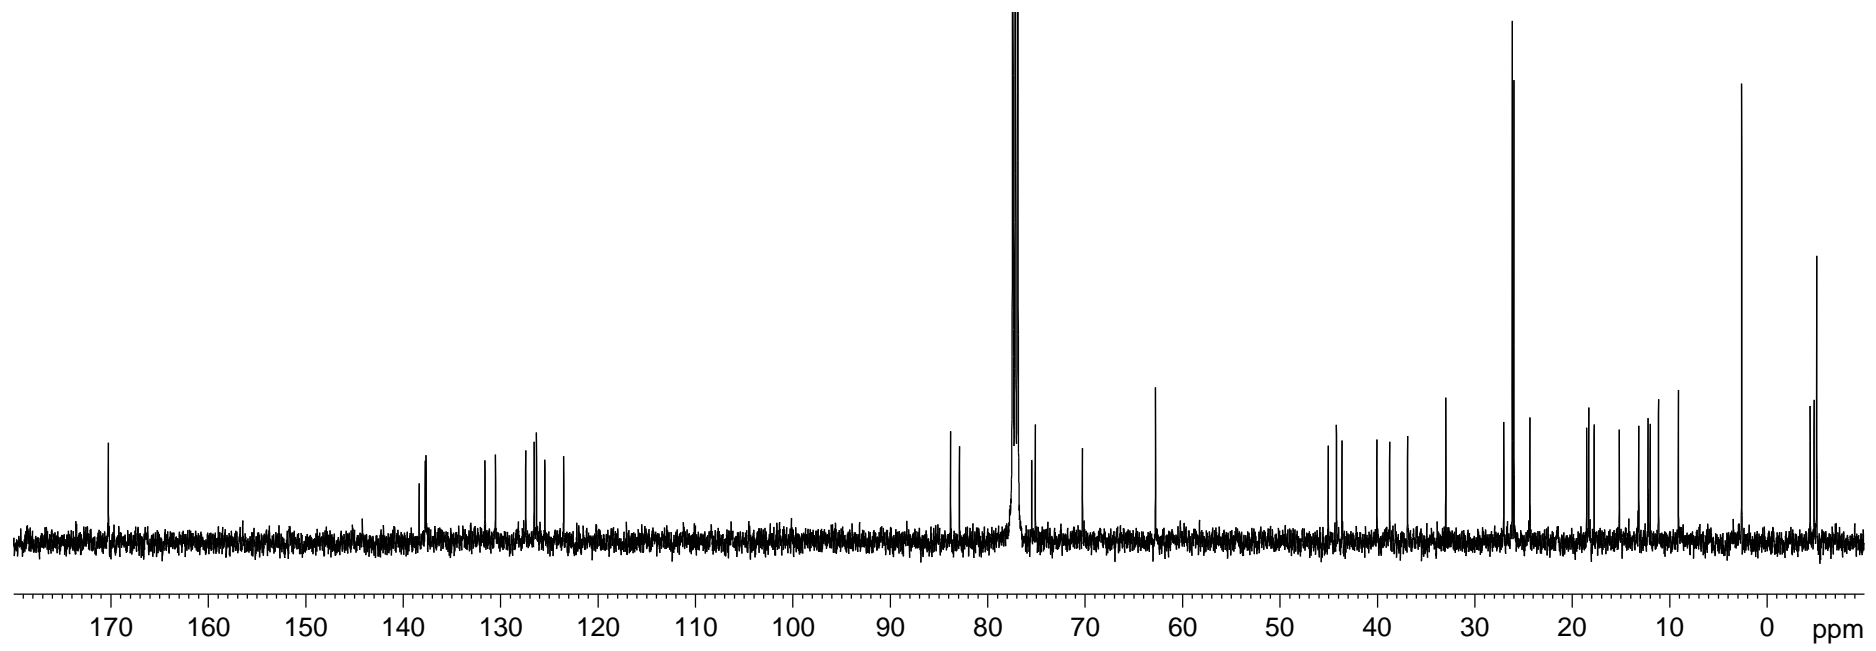

SI-73

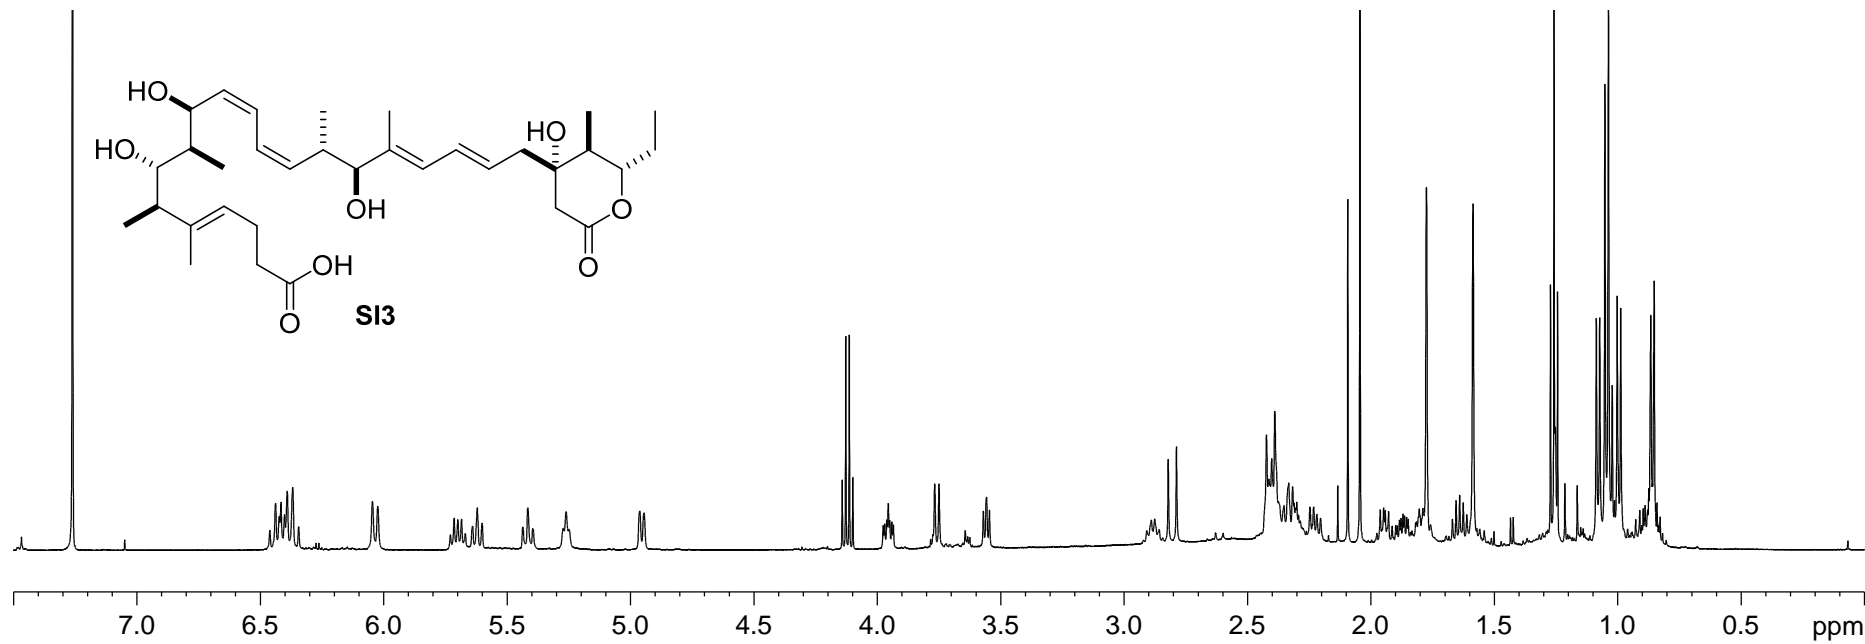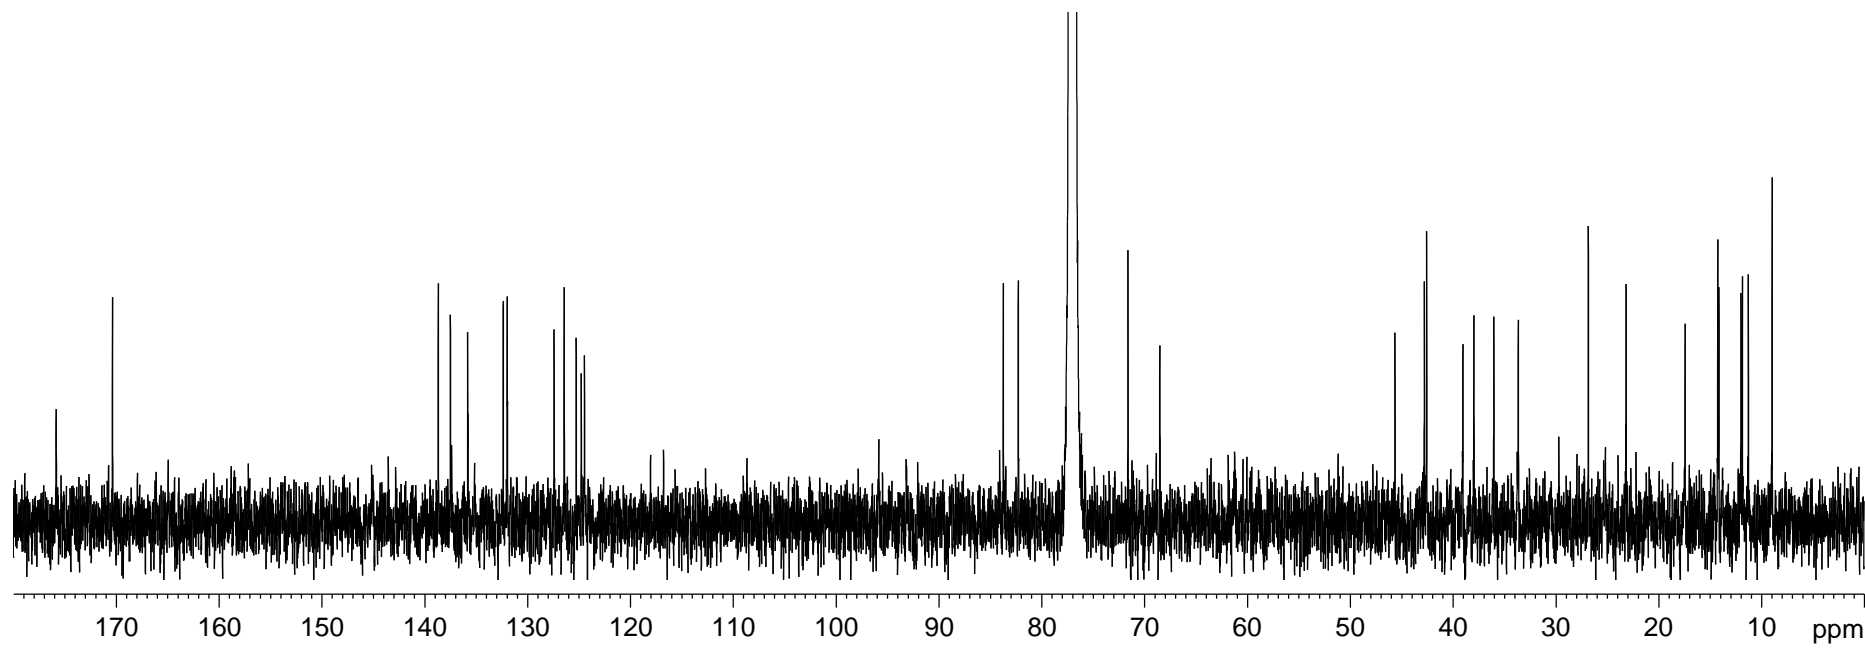

SI-74
